# Supplementary material for: Sustainability assessment of Cerrado and Caatinga biomes in Brazil: A proposal for collaborative index construction in the context of the 2030 Agenda and the Water-Energy-Food Nexus
Source: Frontiers journal article supplement (doi:10.3389/fphy.2022.1060182), 2023-01-09

**Figures - part 1**

**Study area**

**
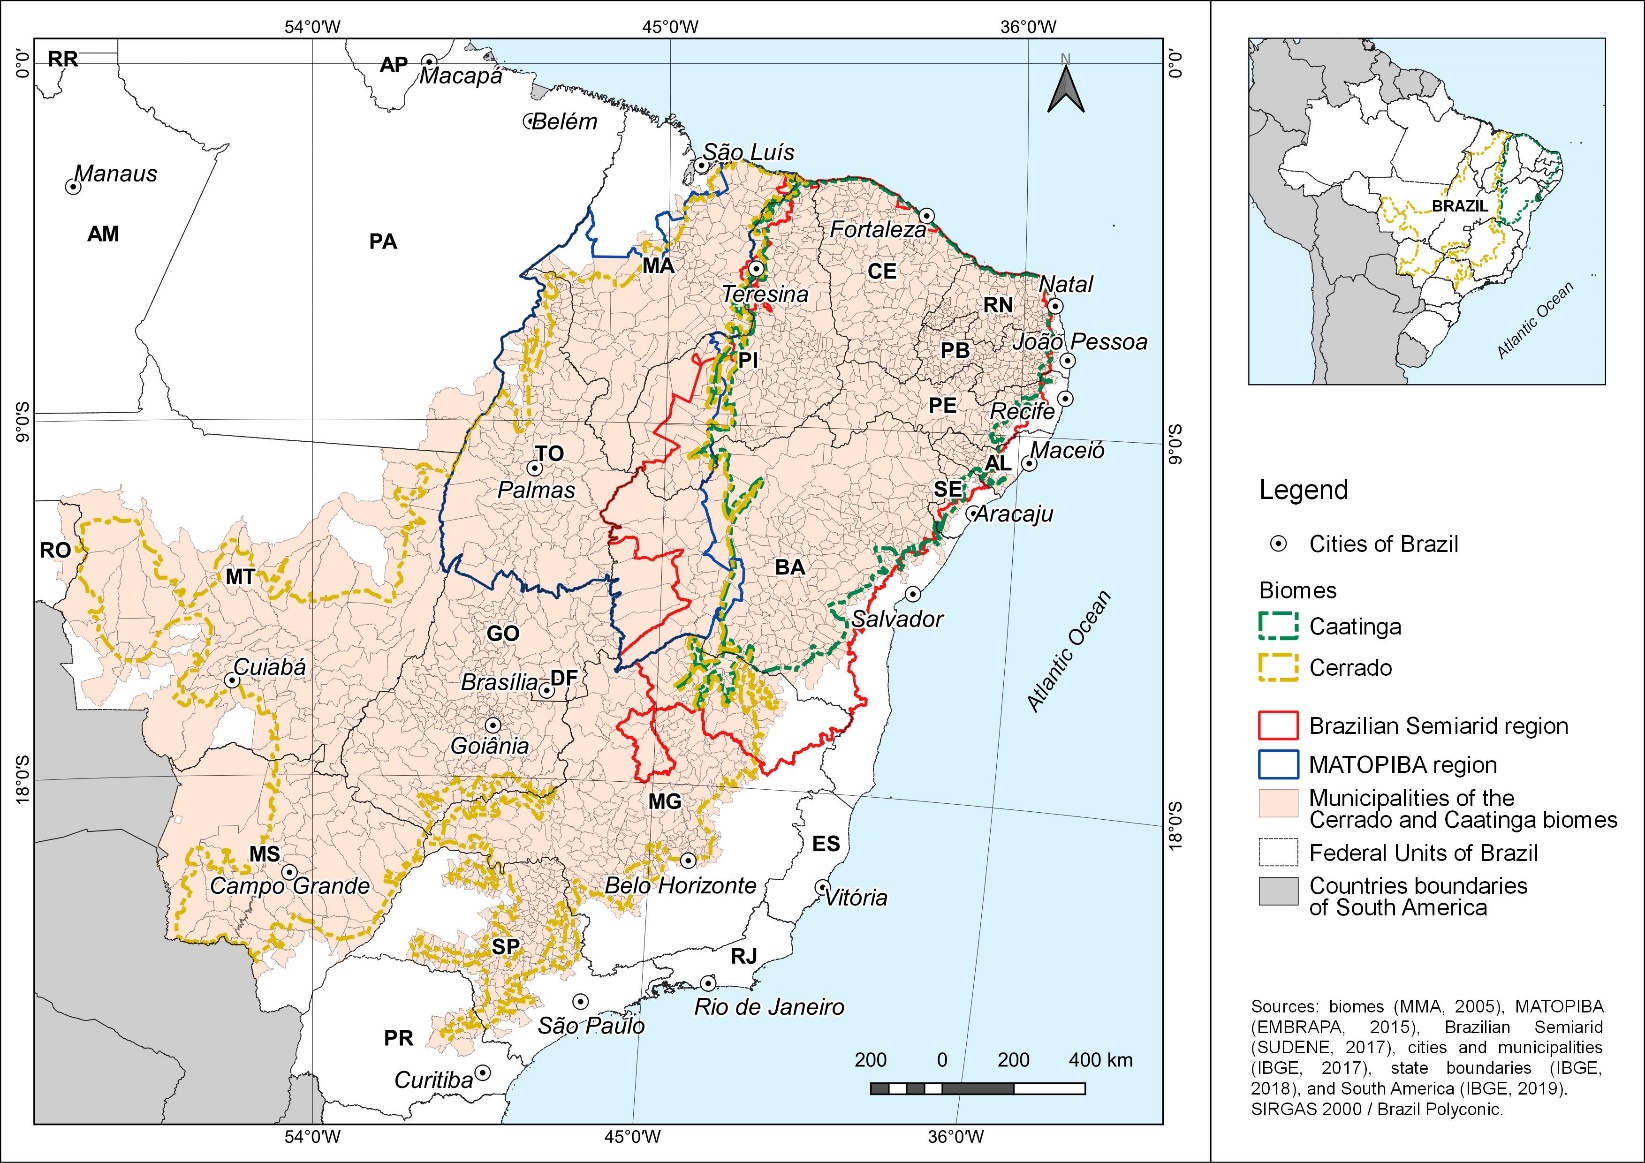
**

**Sustainable Development Goal Index Maps**

SDG 01 and 02 Index


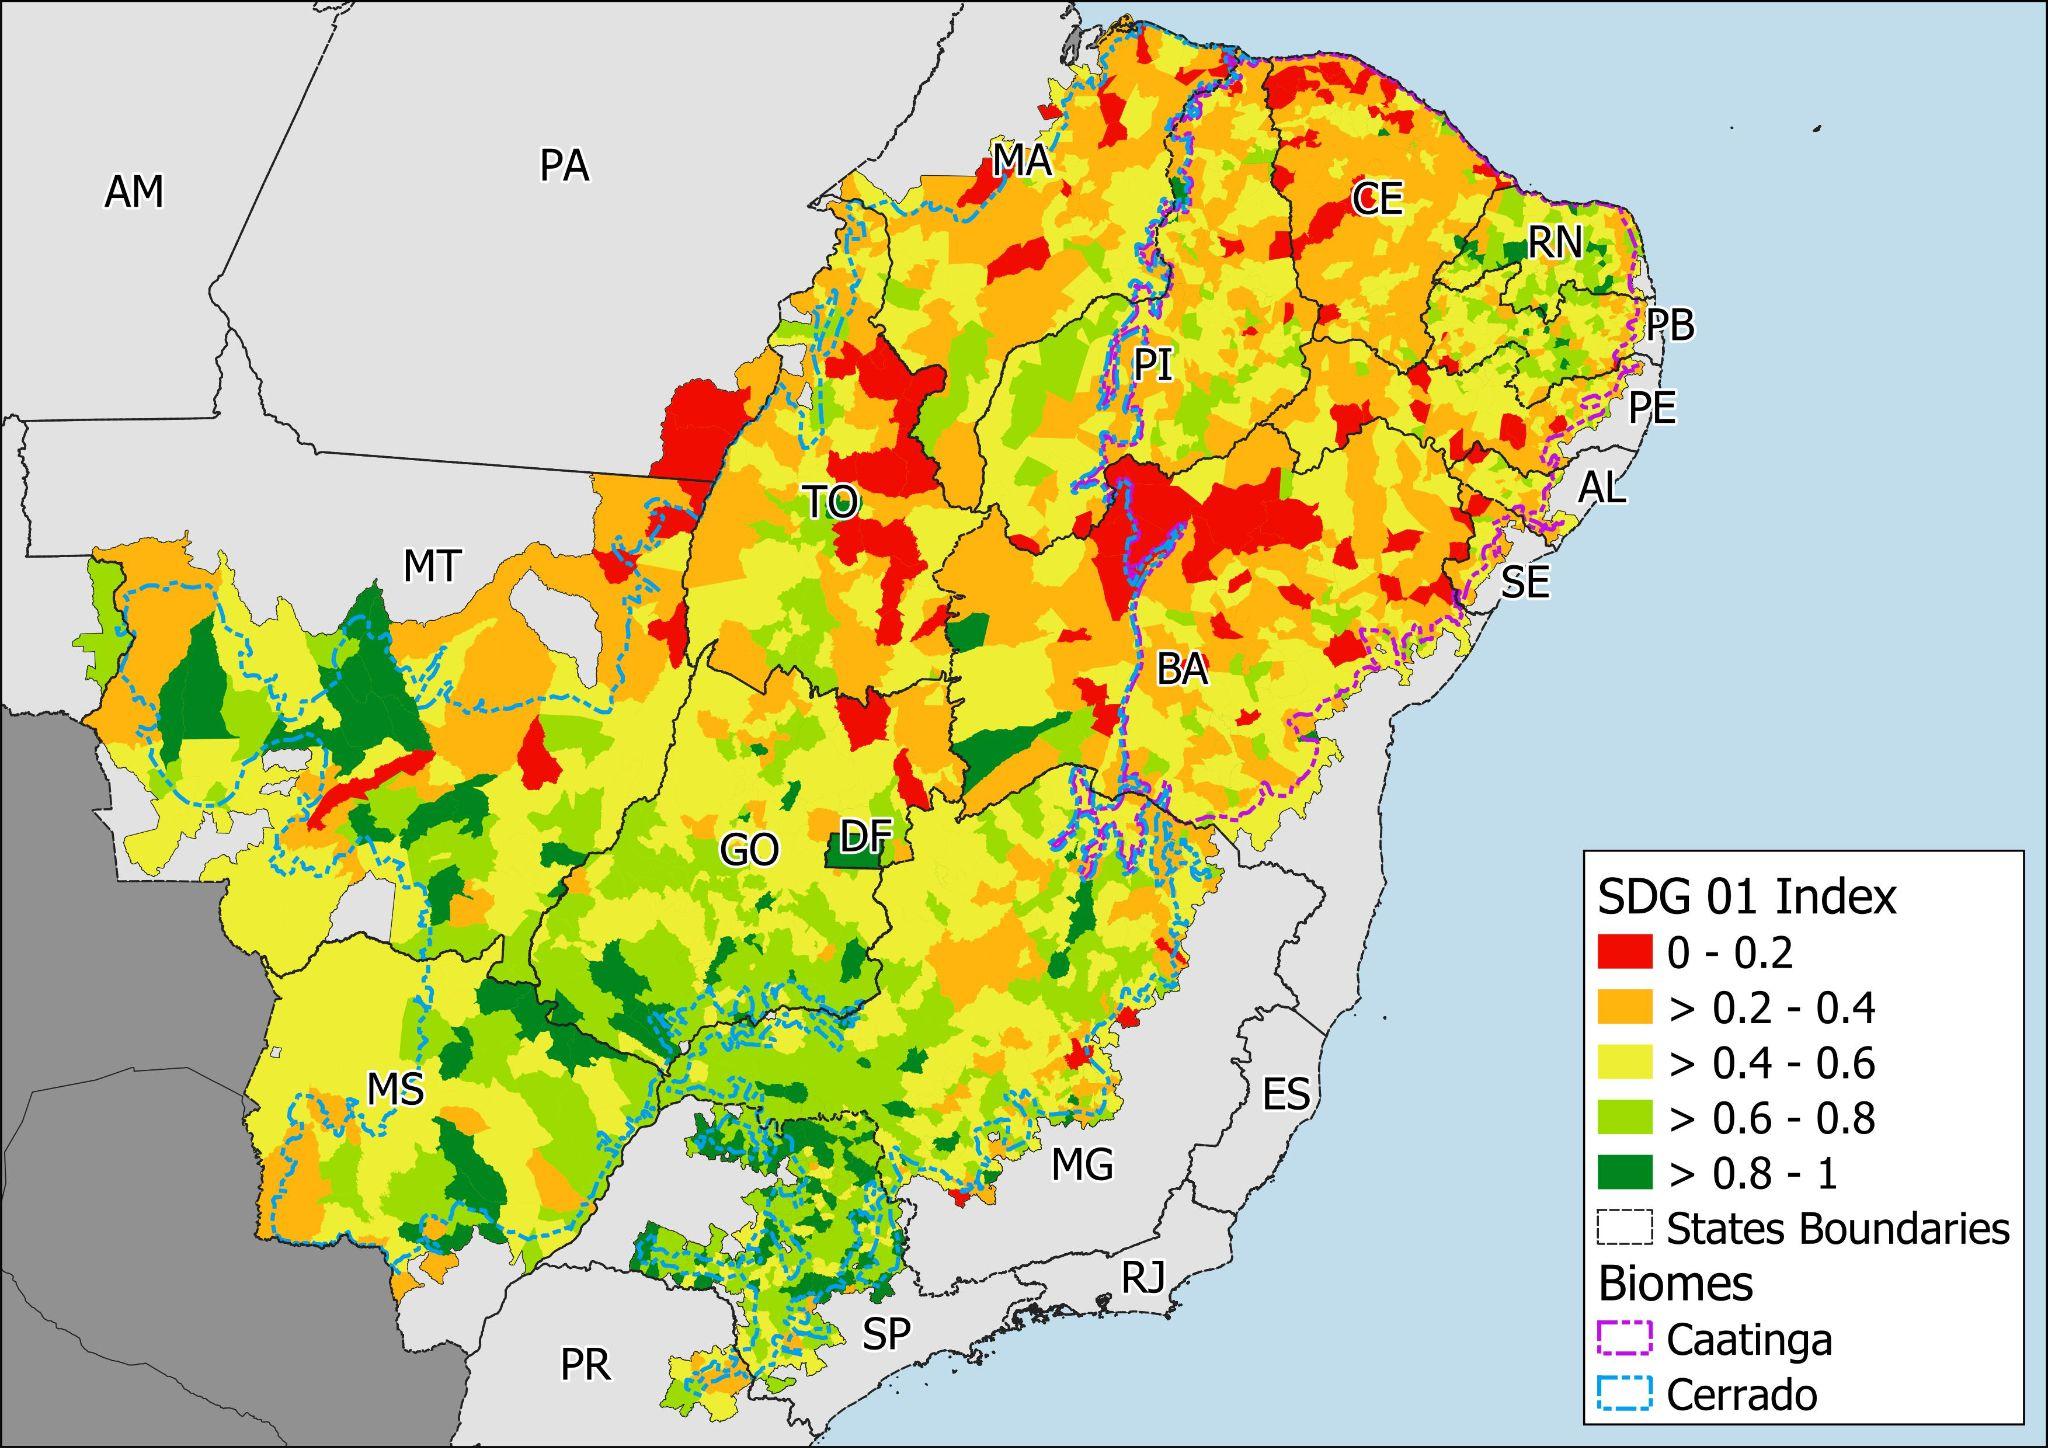

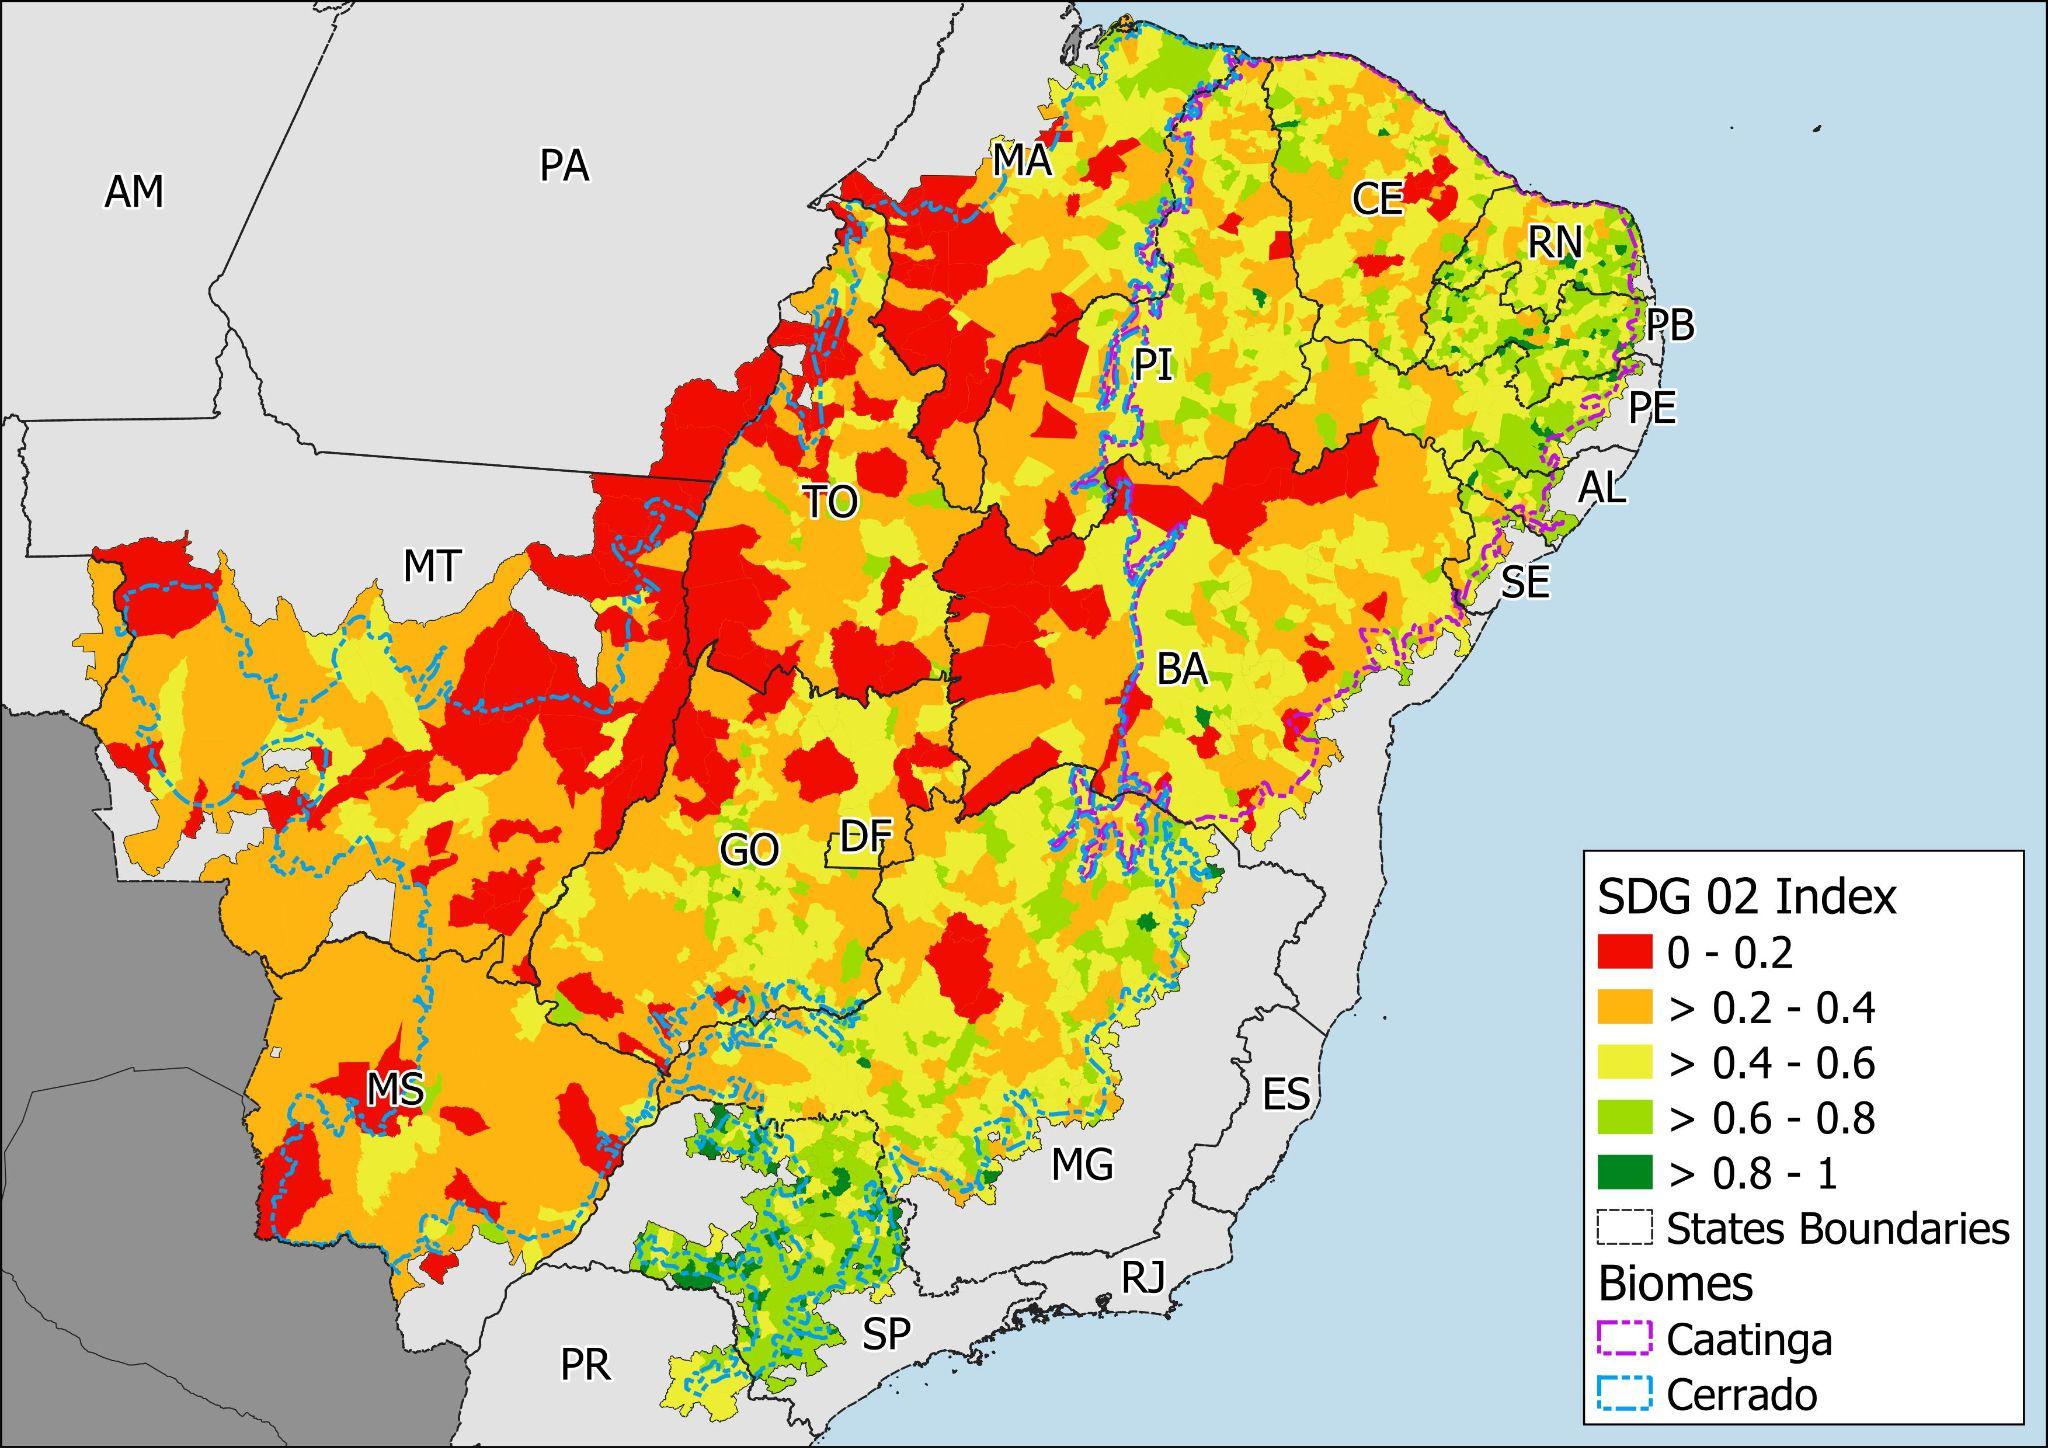


SDG 03 and 04 Index


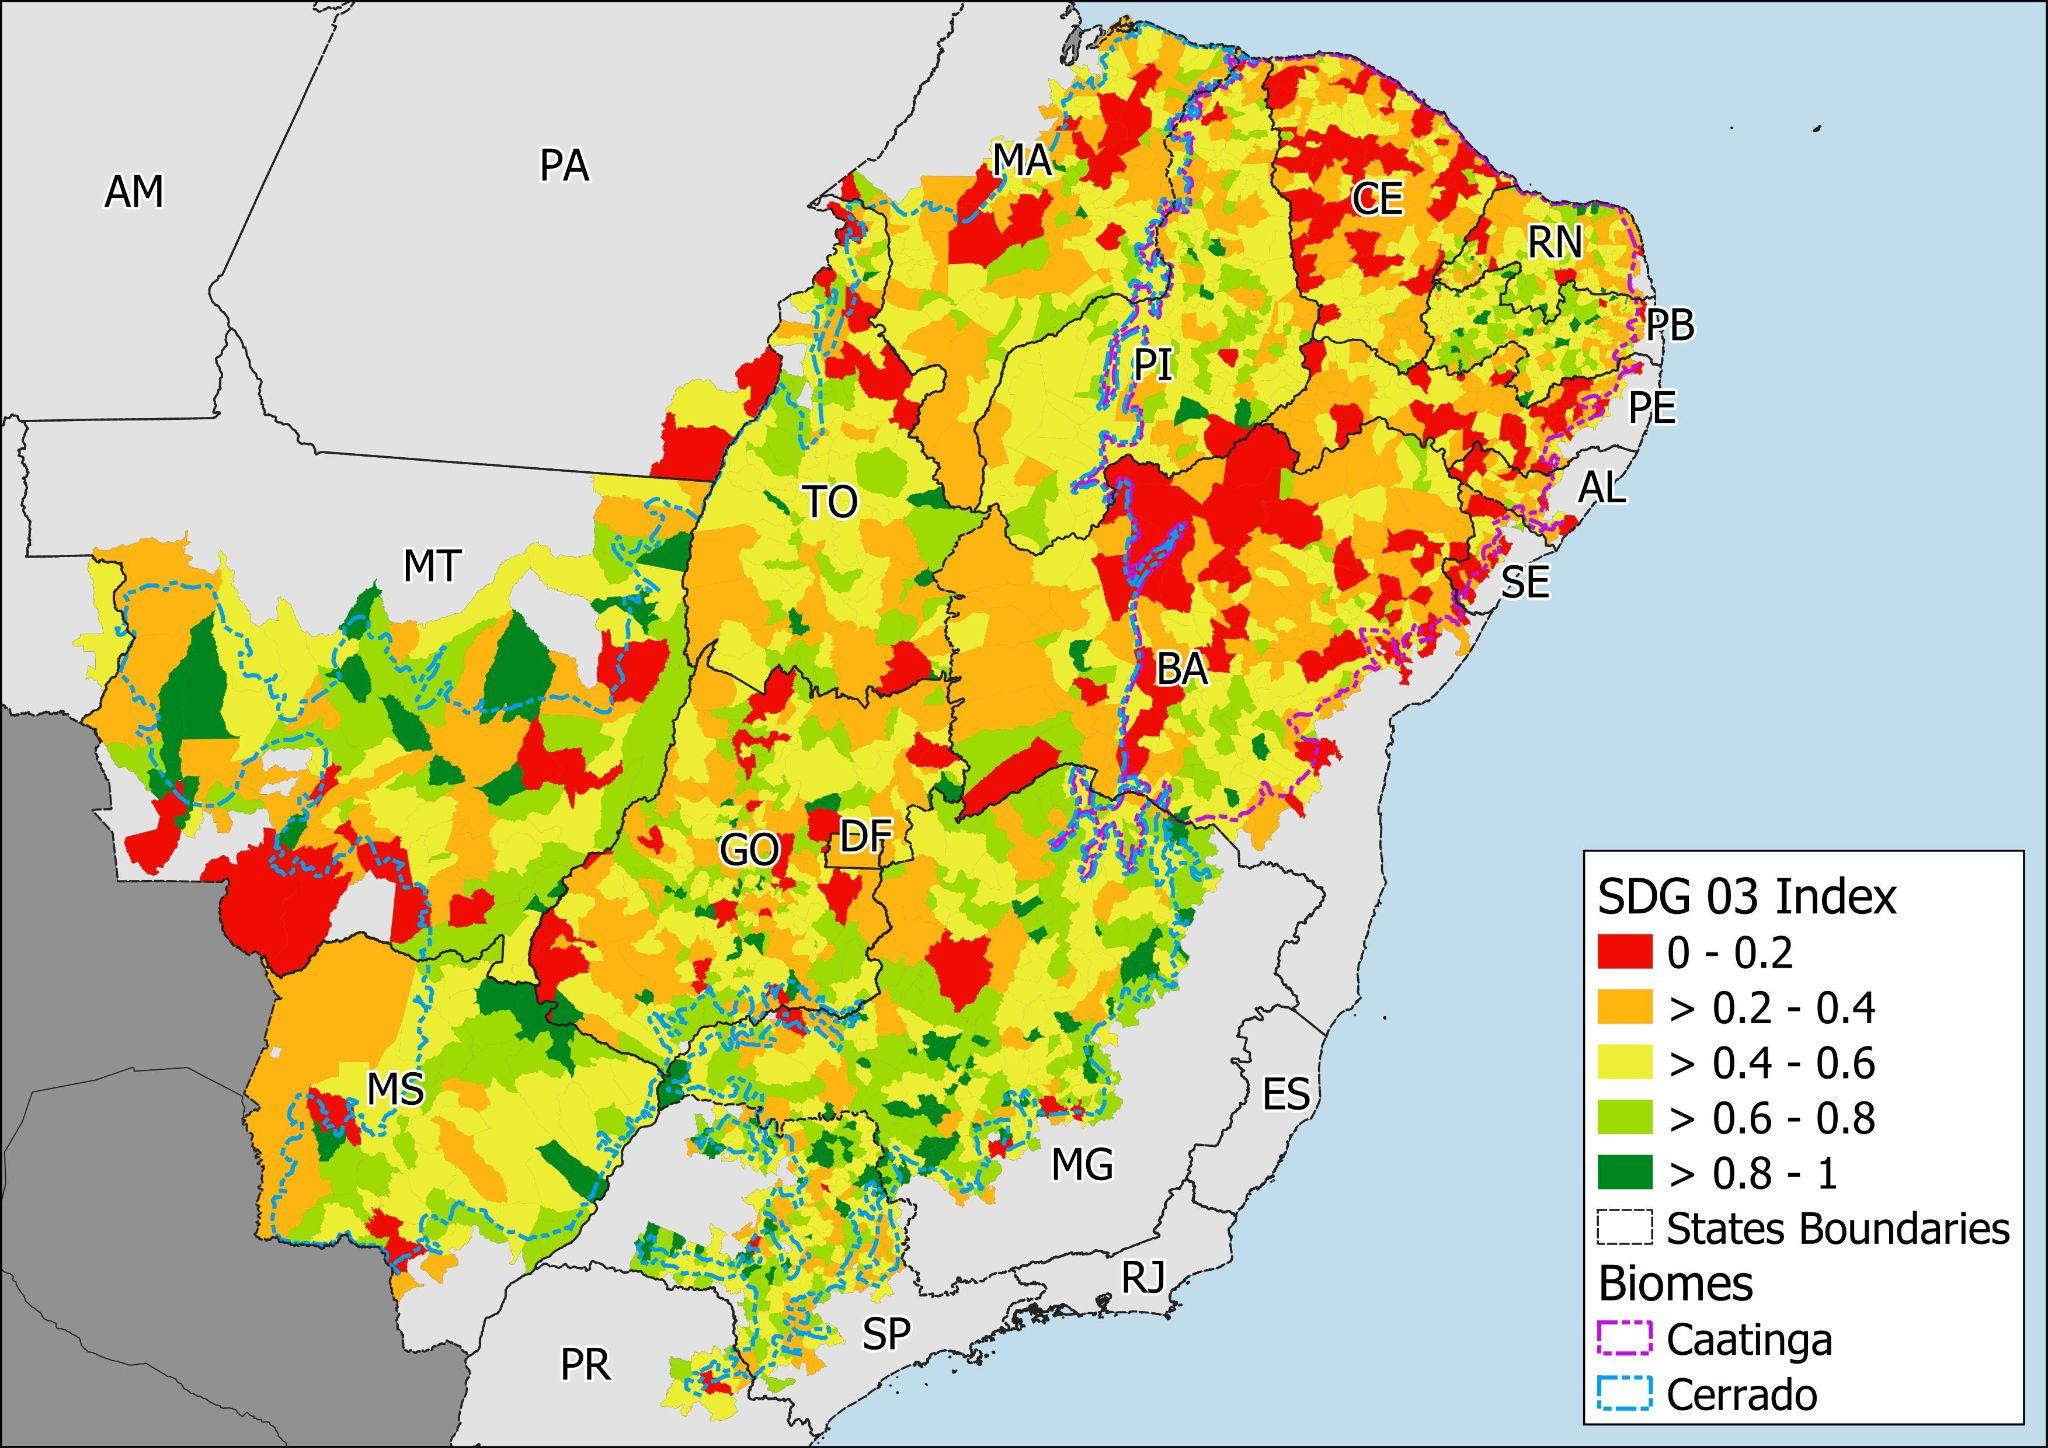

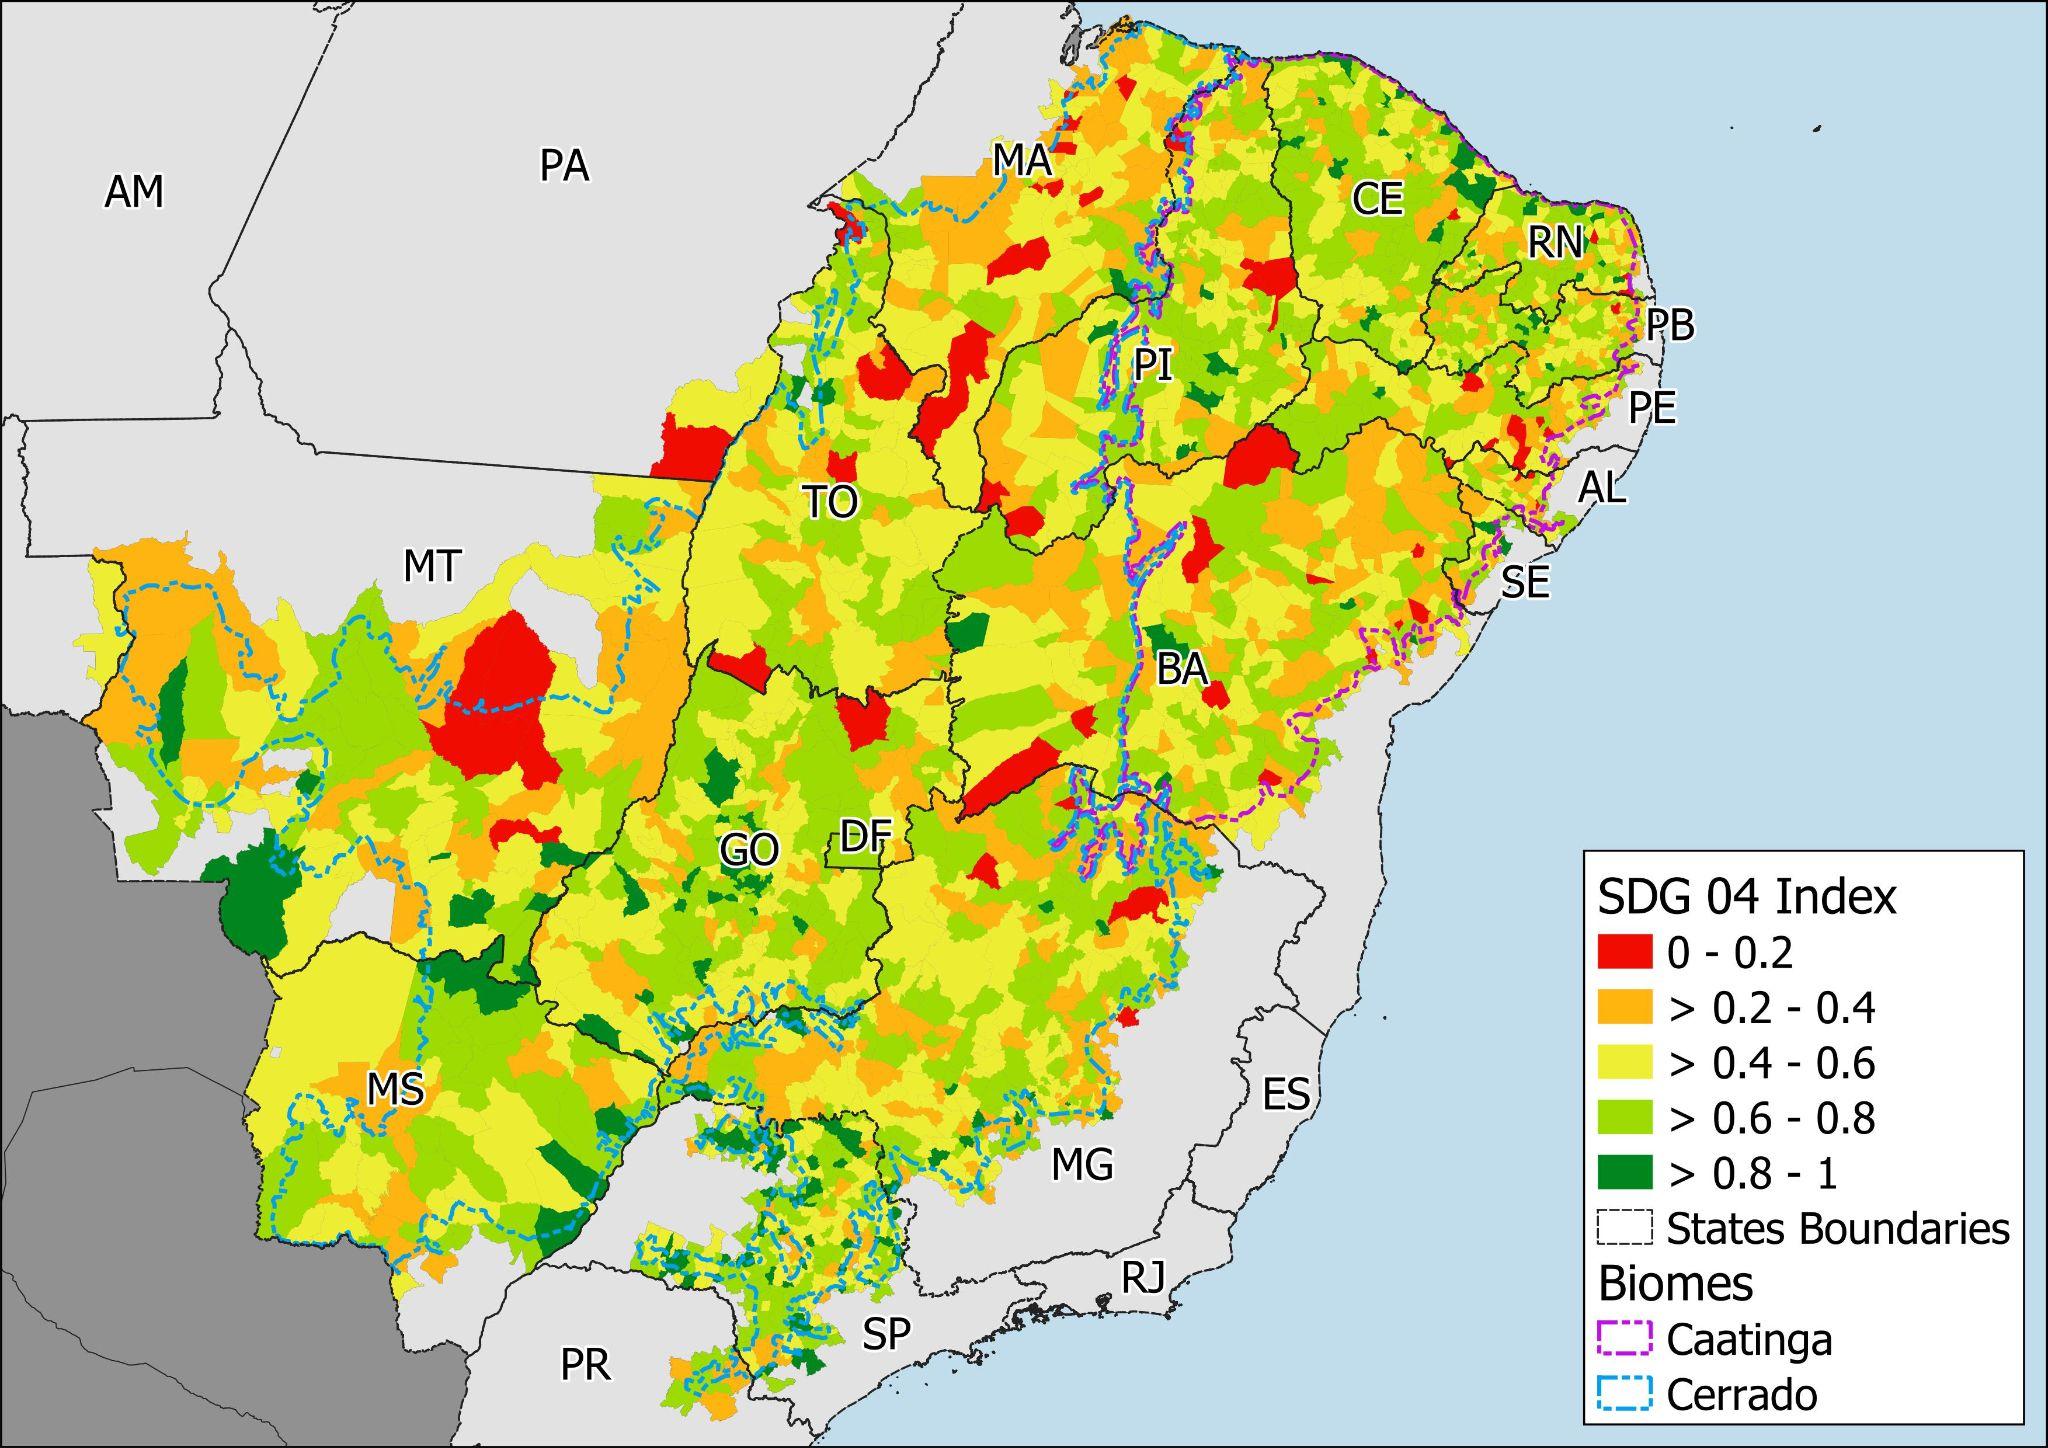


SDG 05 and 06 Index


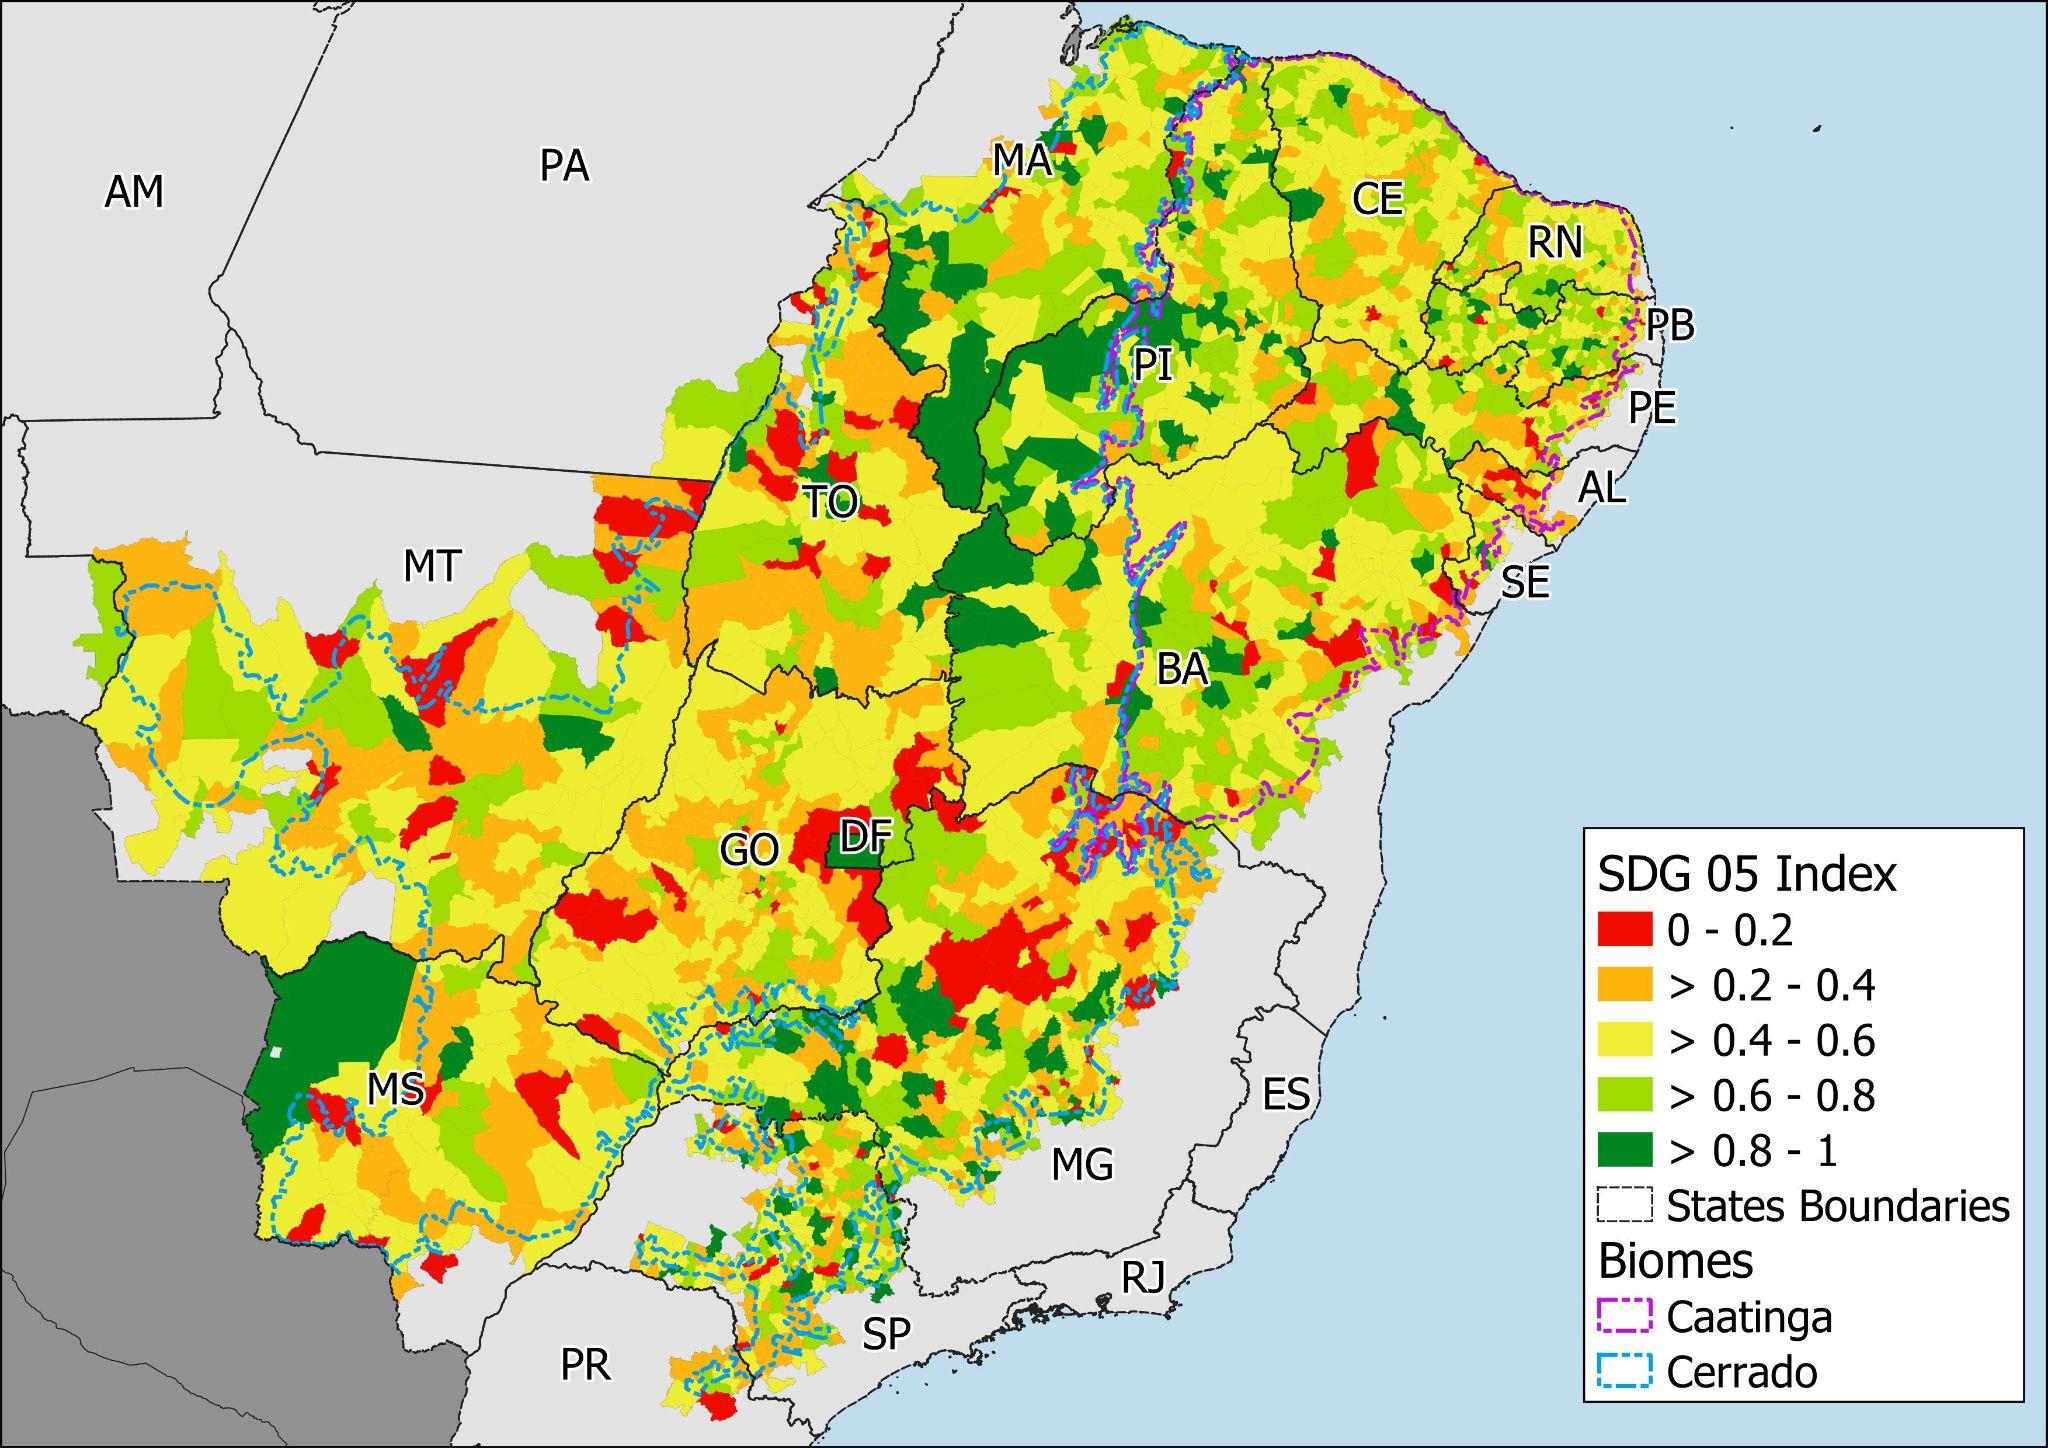

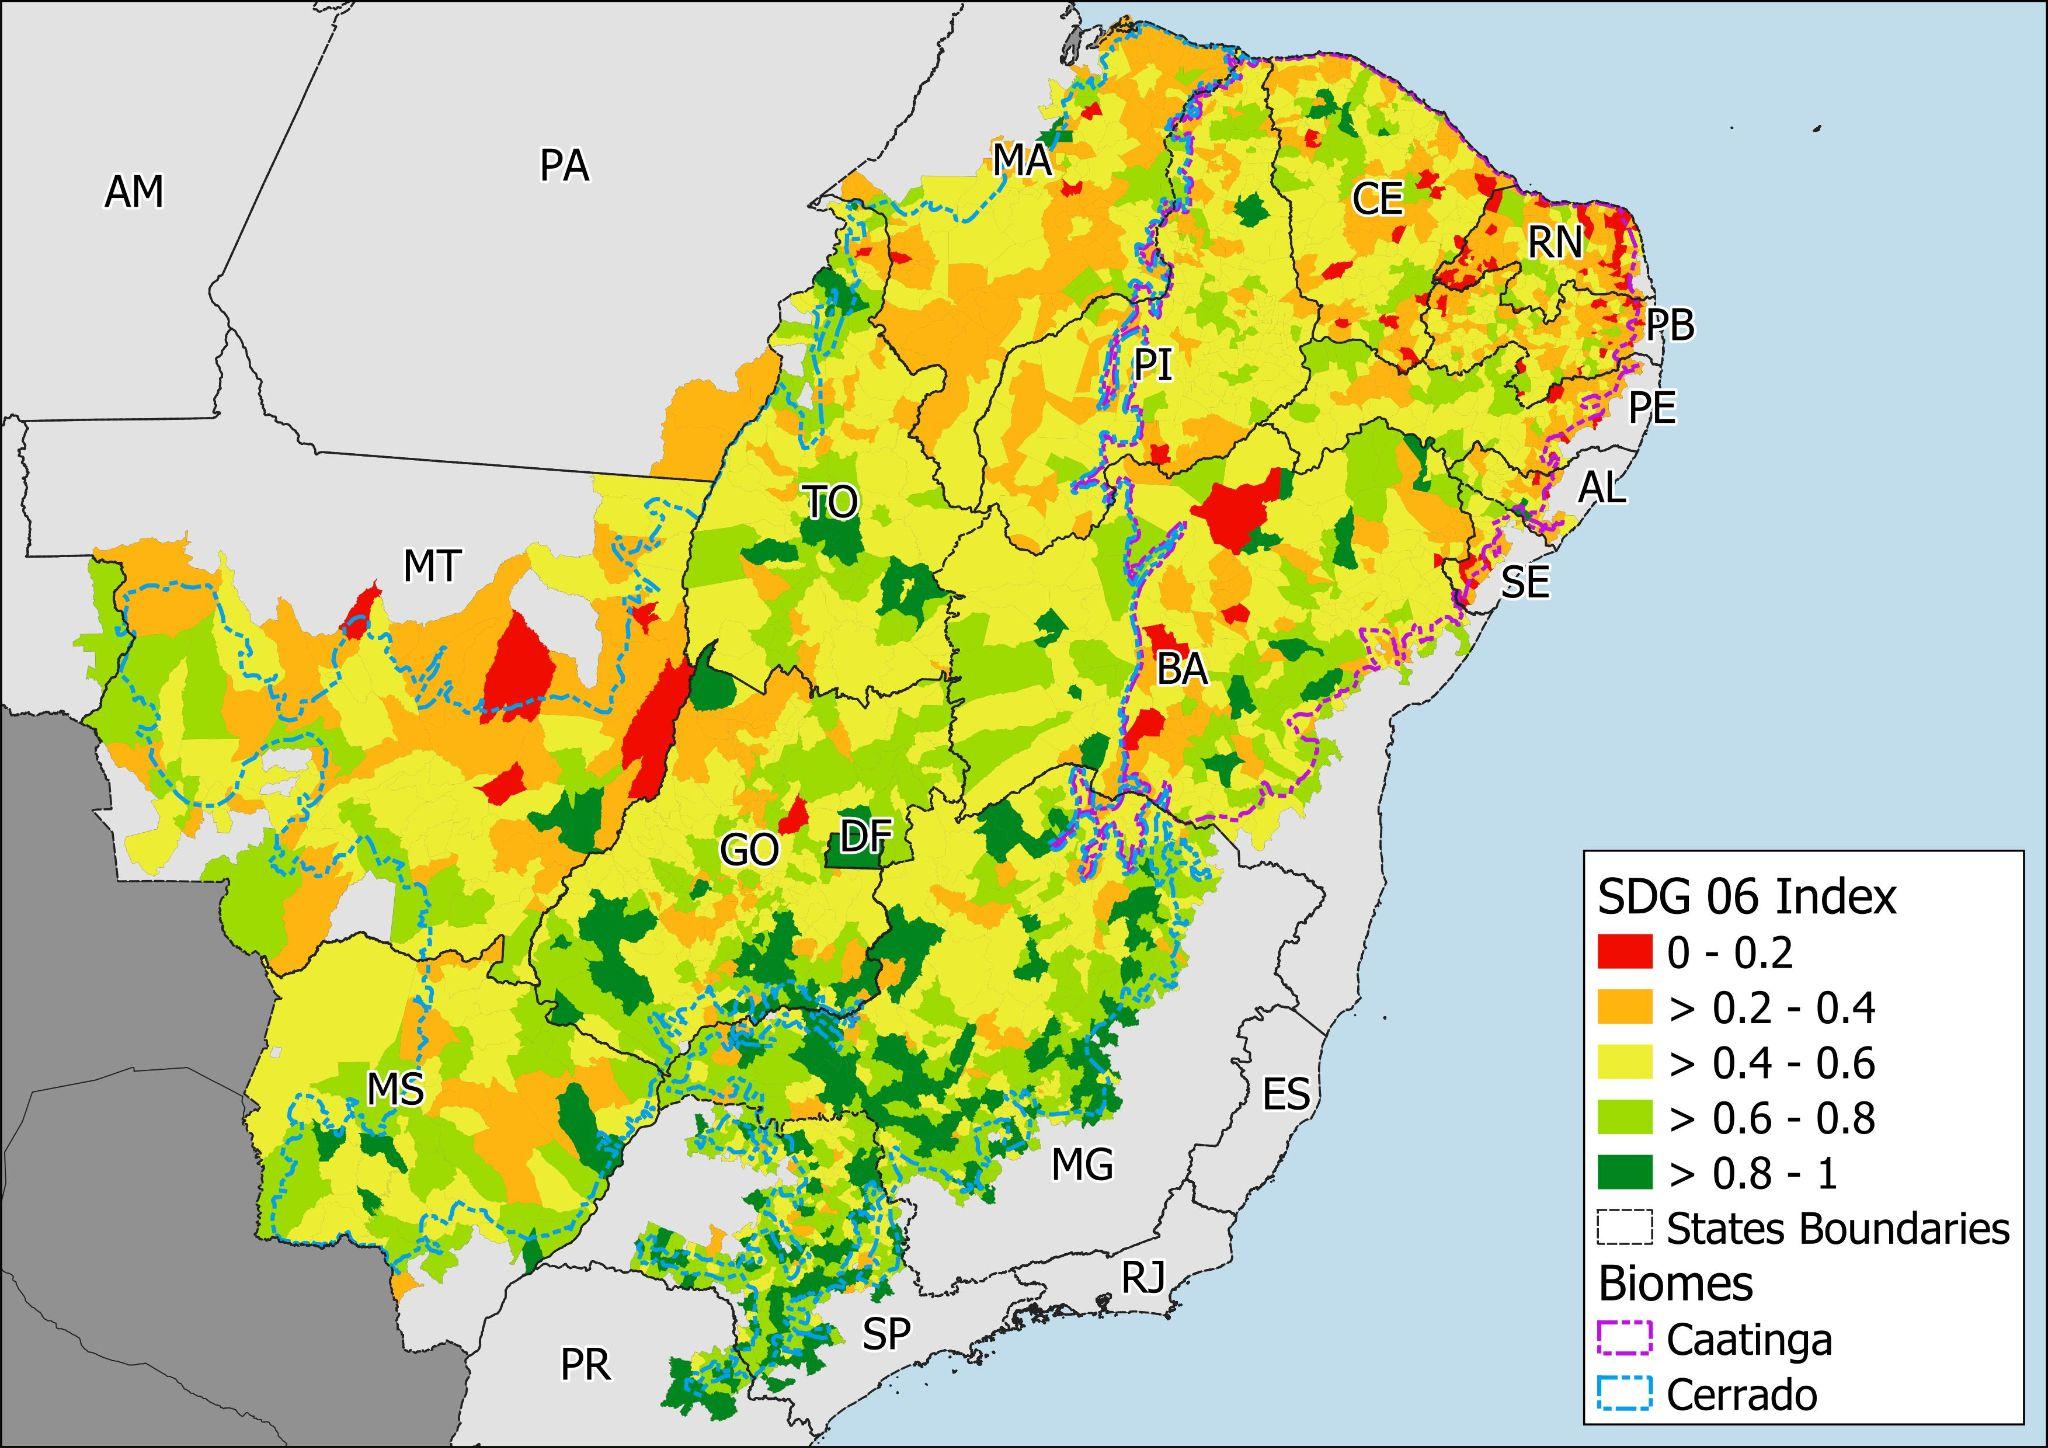


SDG 07 and 08 Index


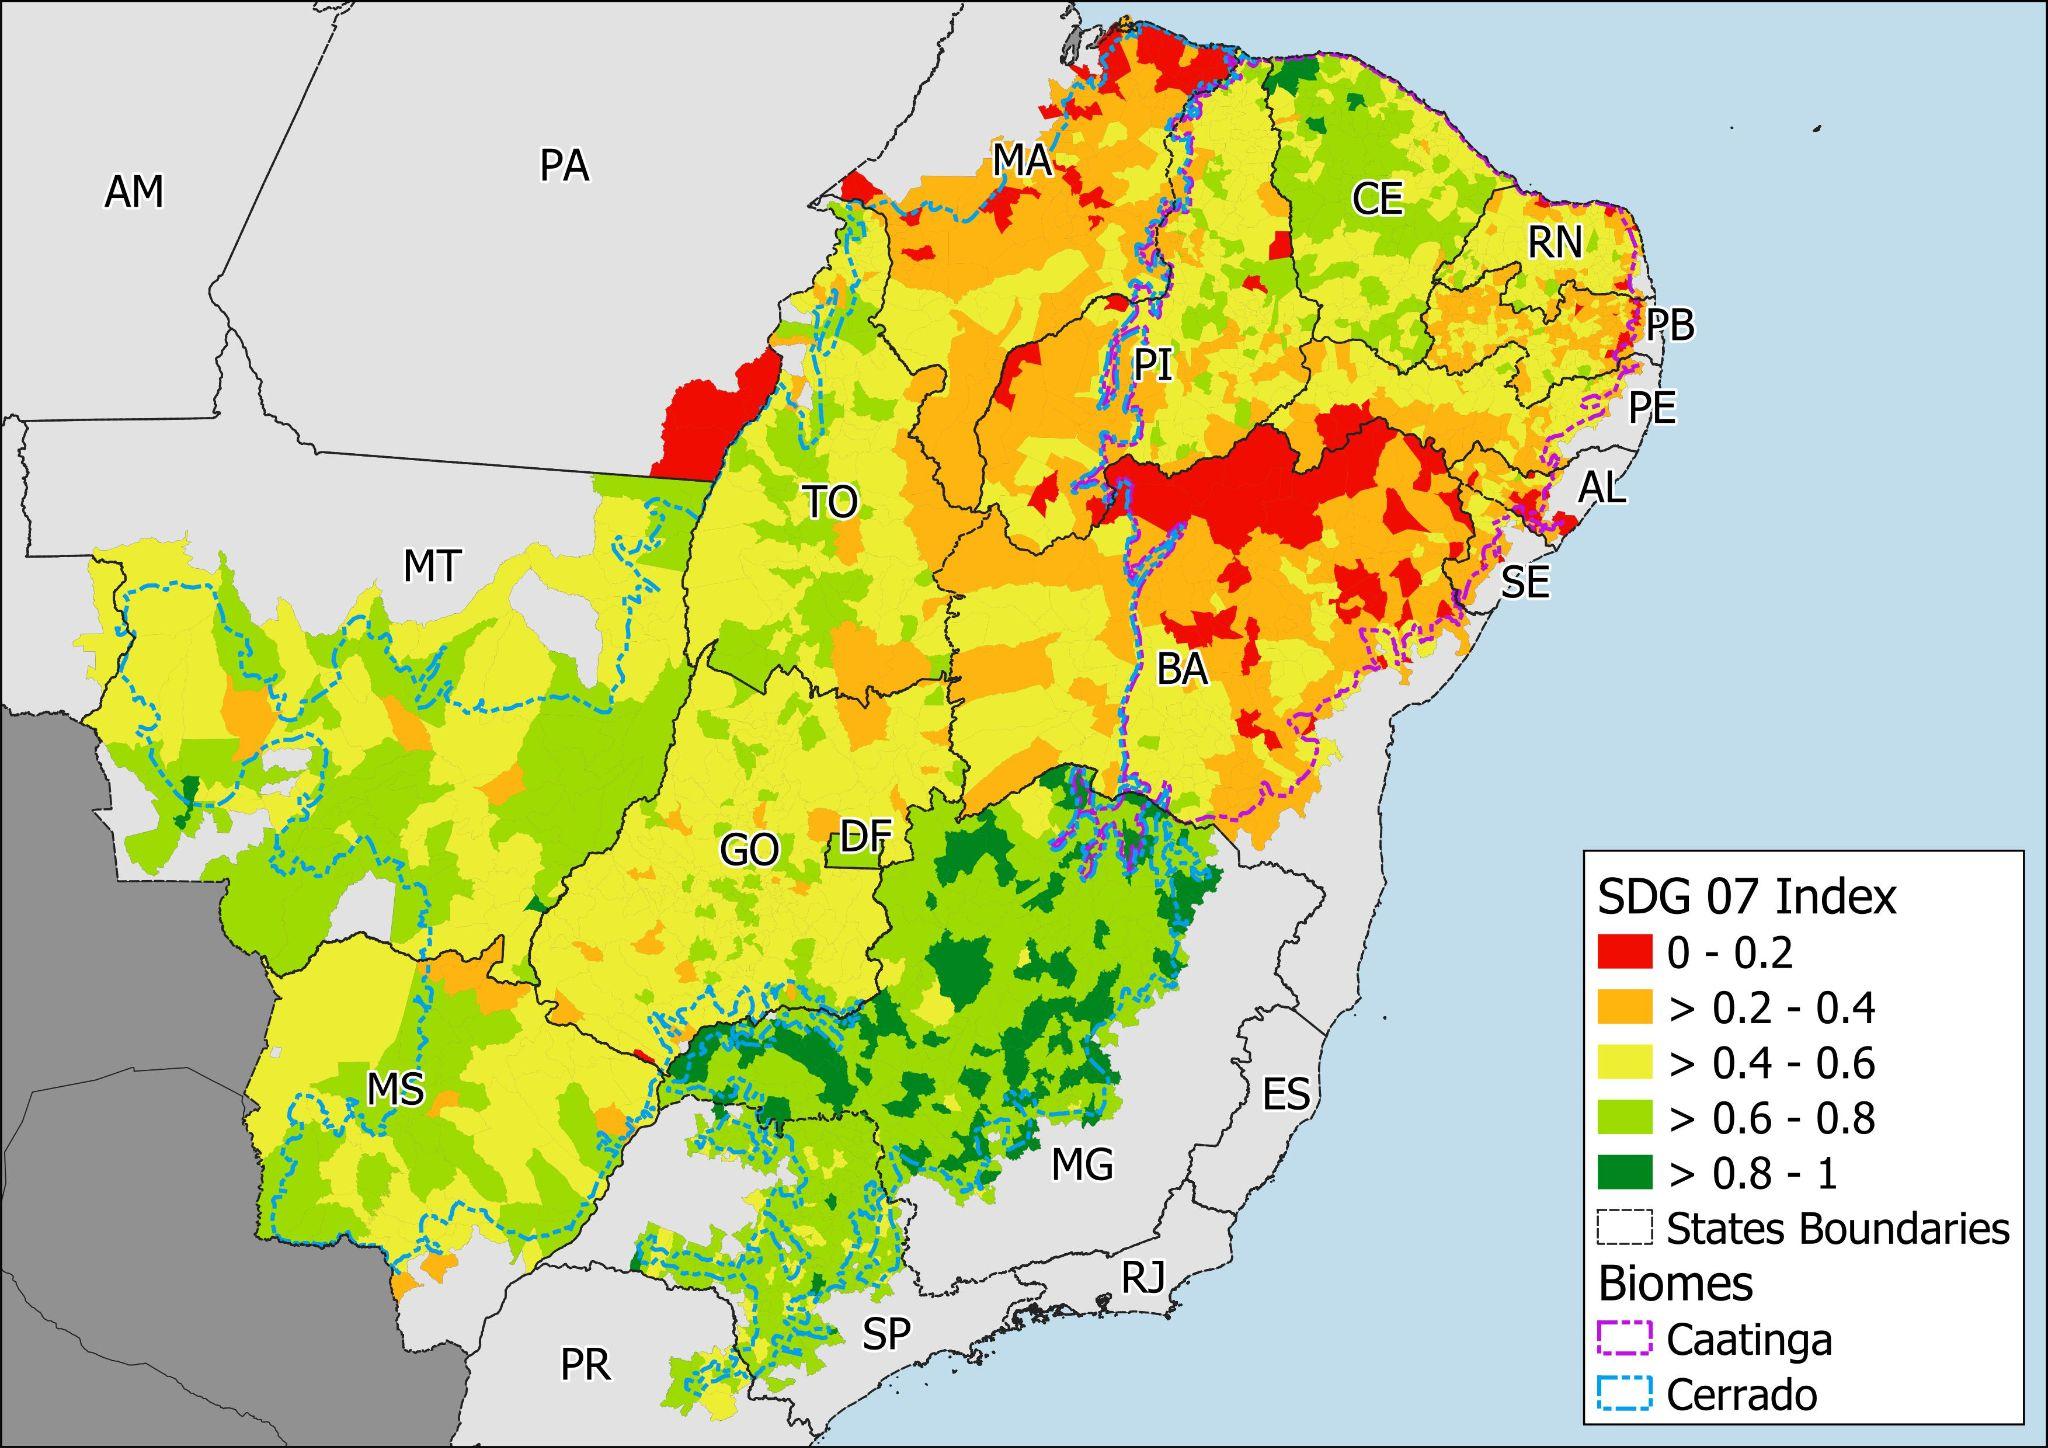

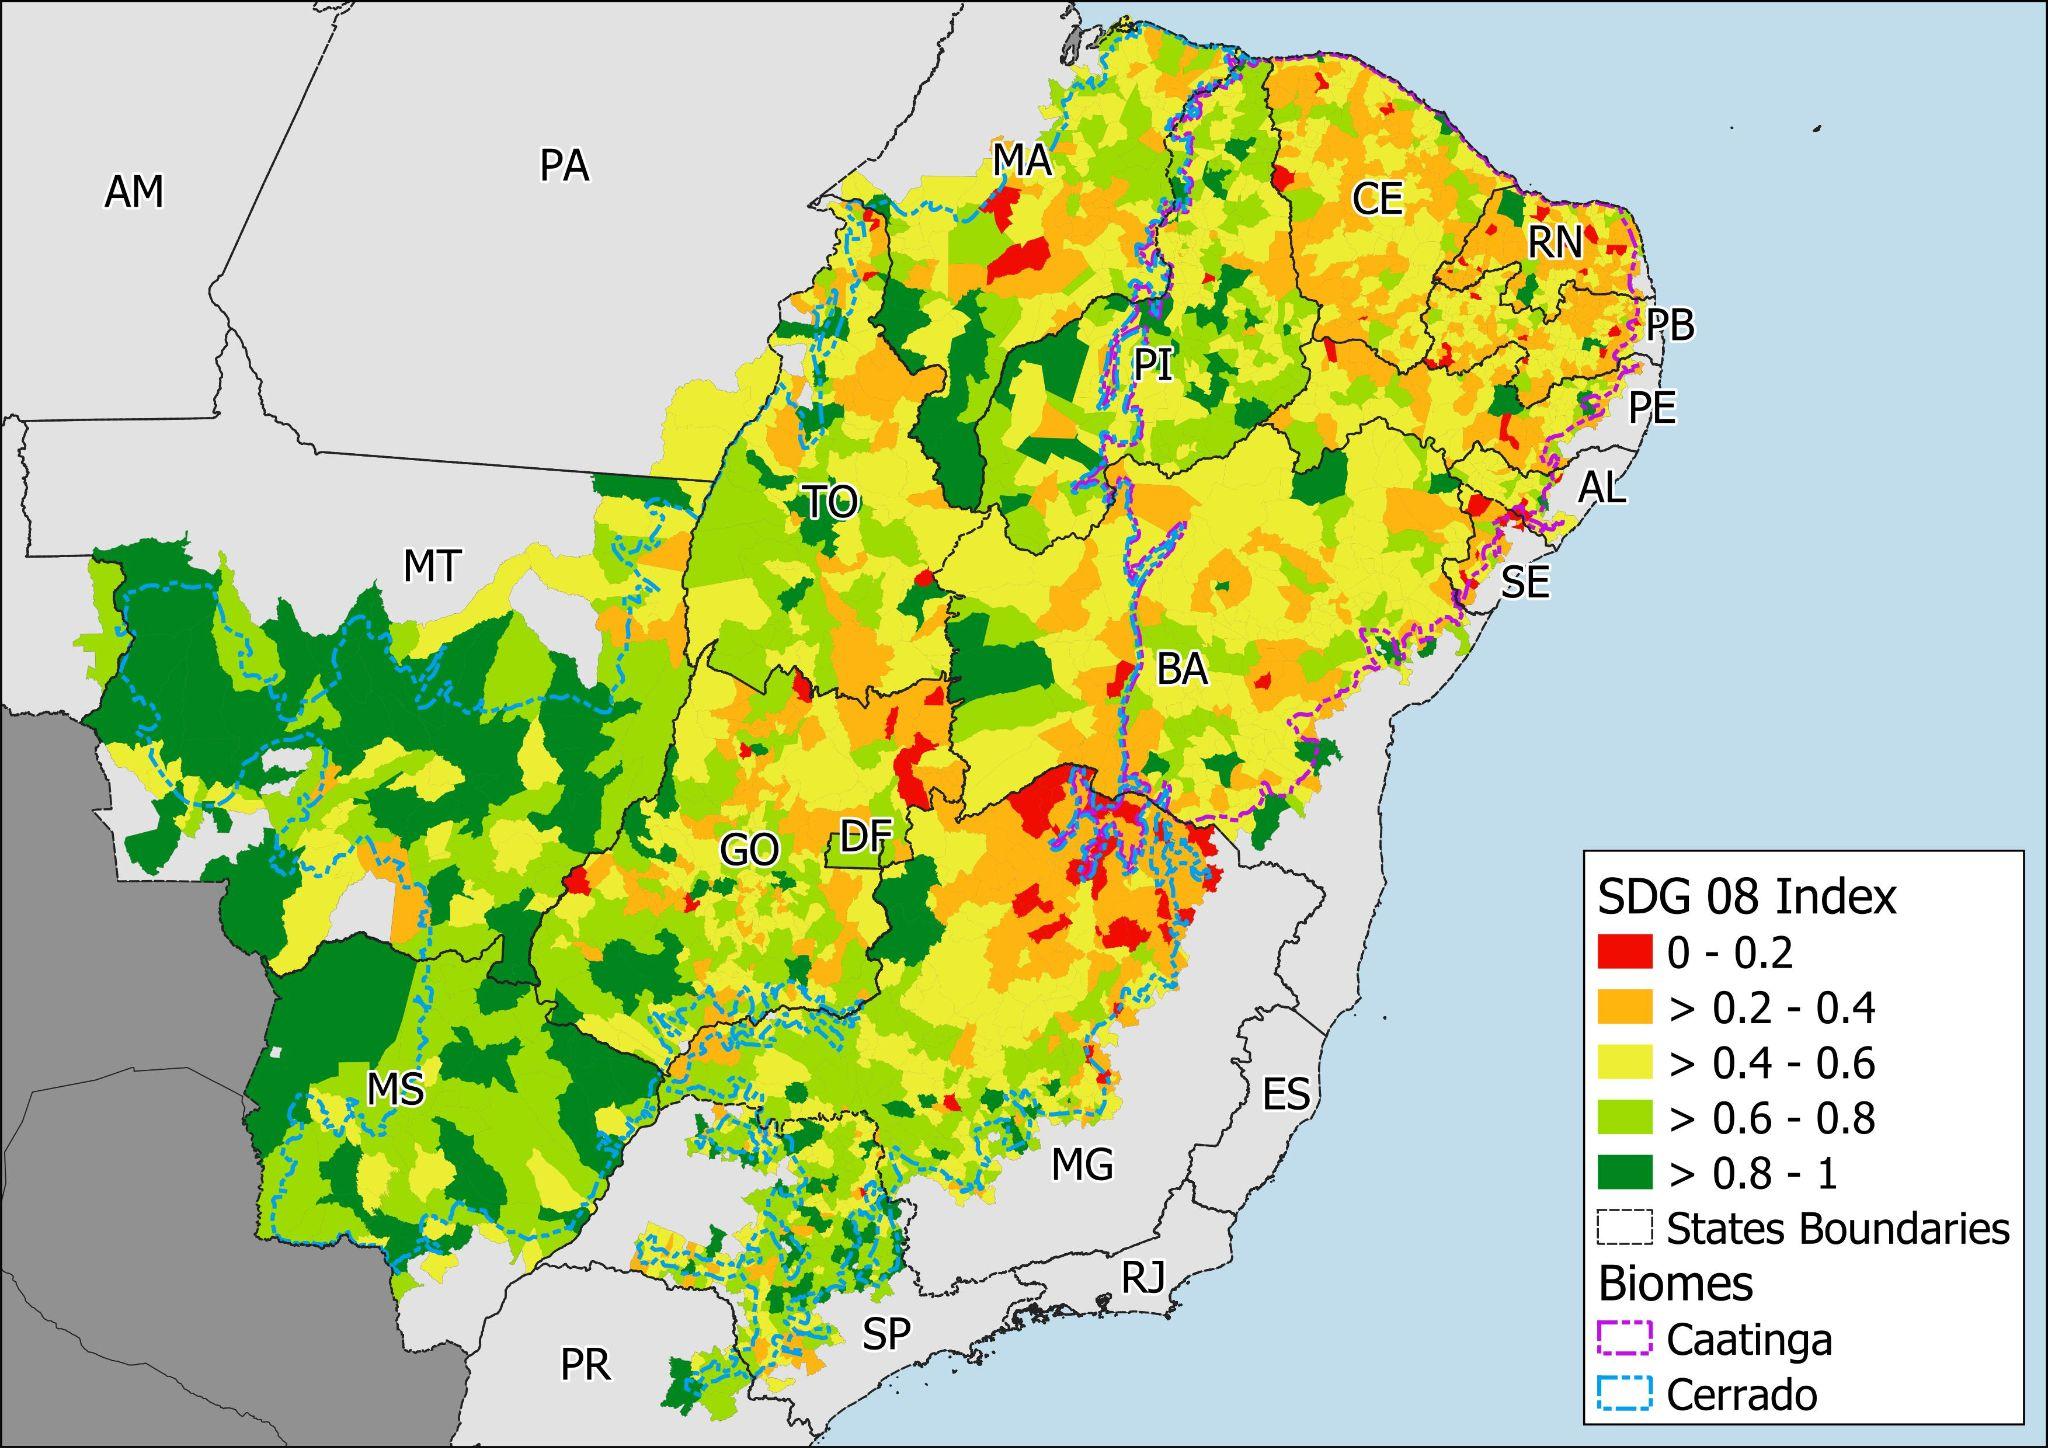


SDG 09 and 10 Index


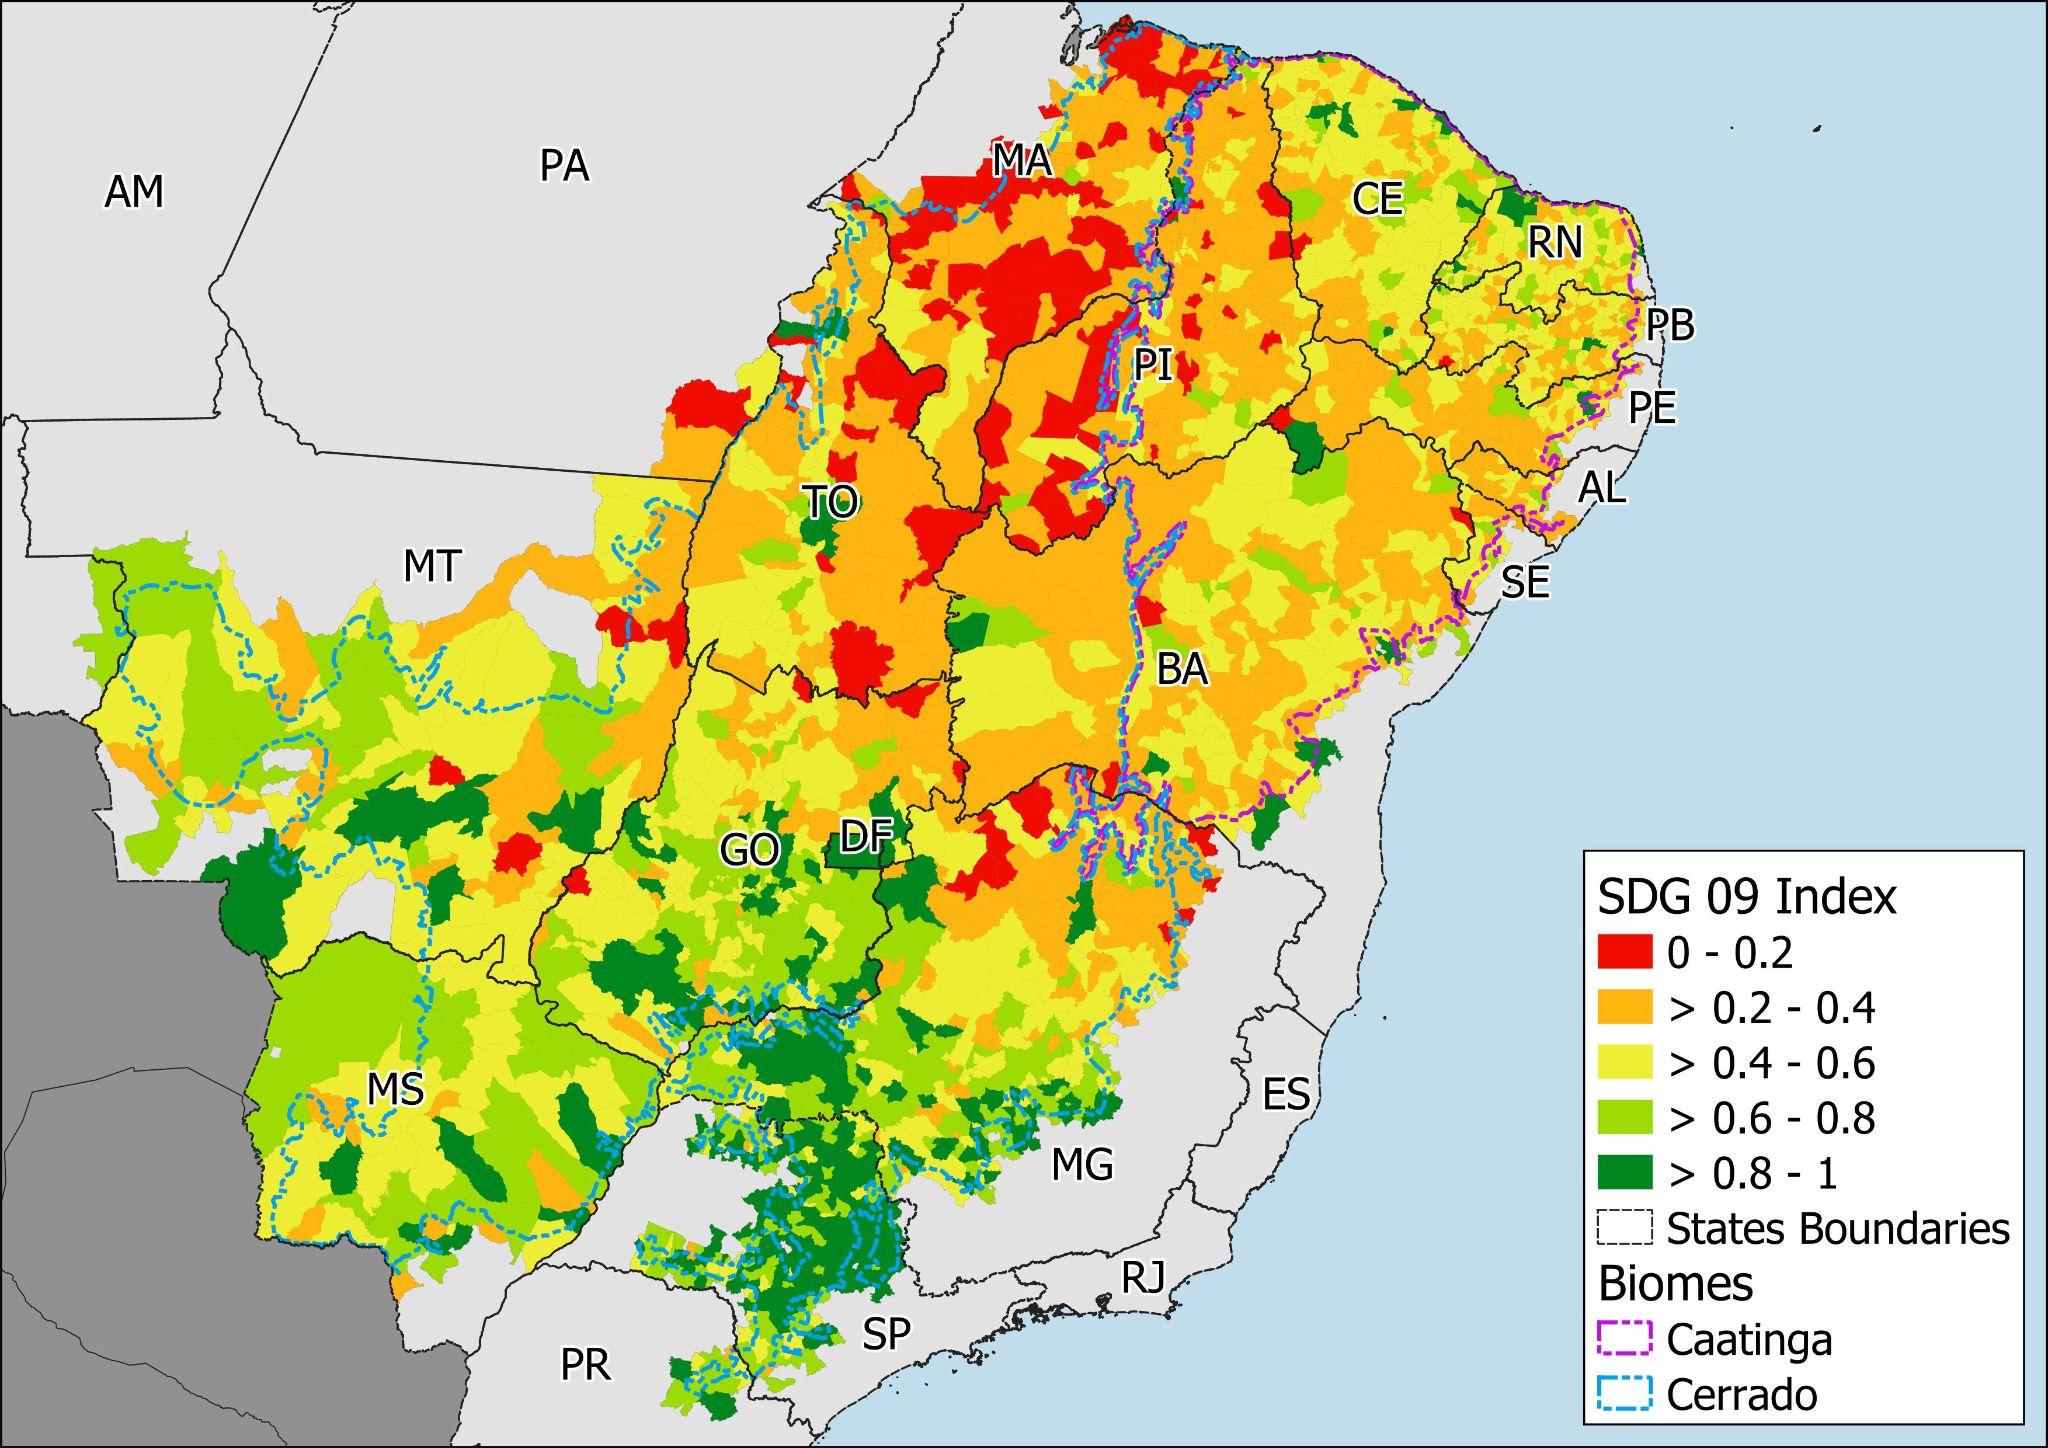

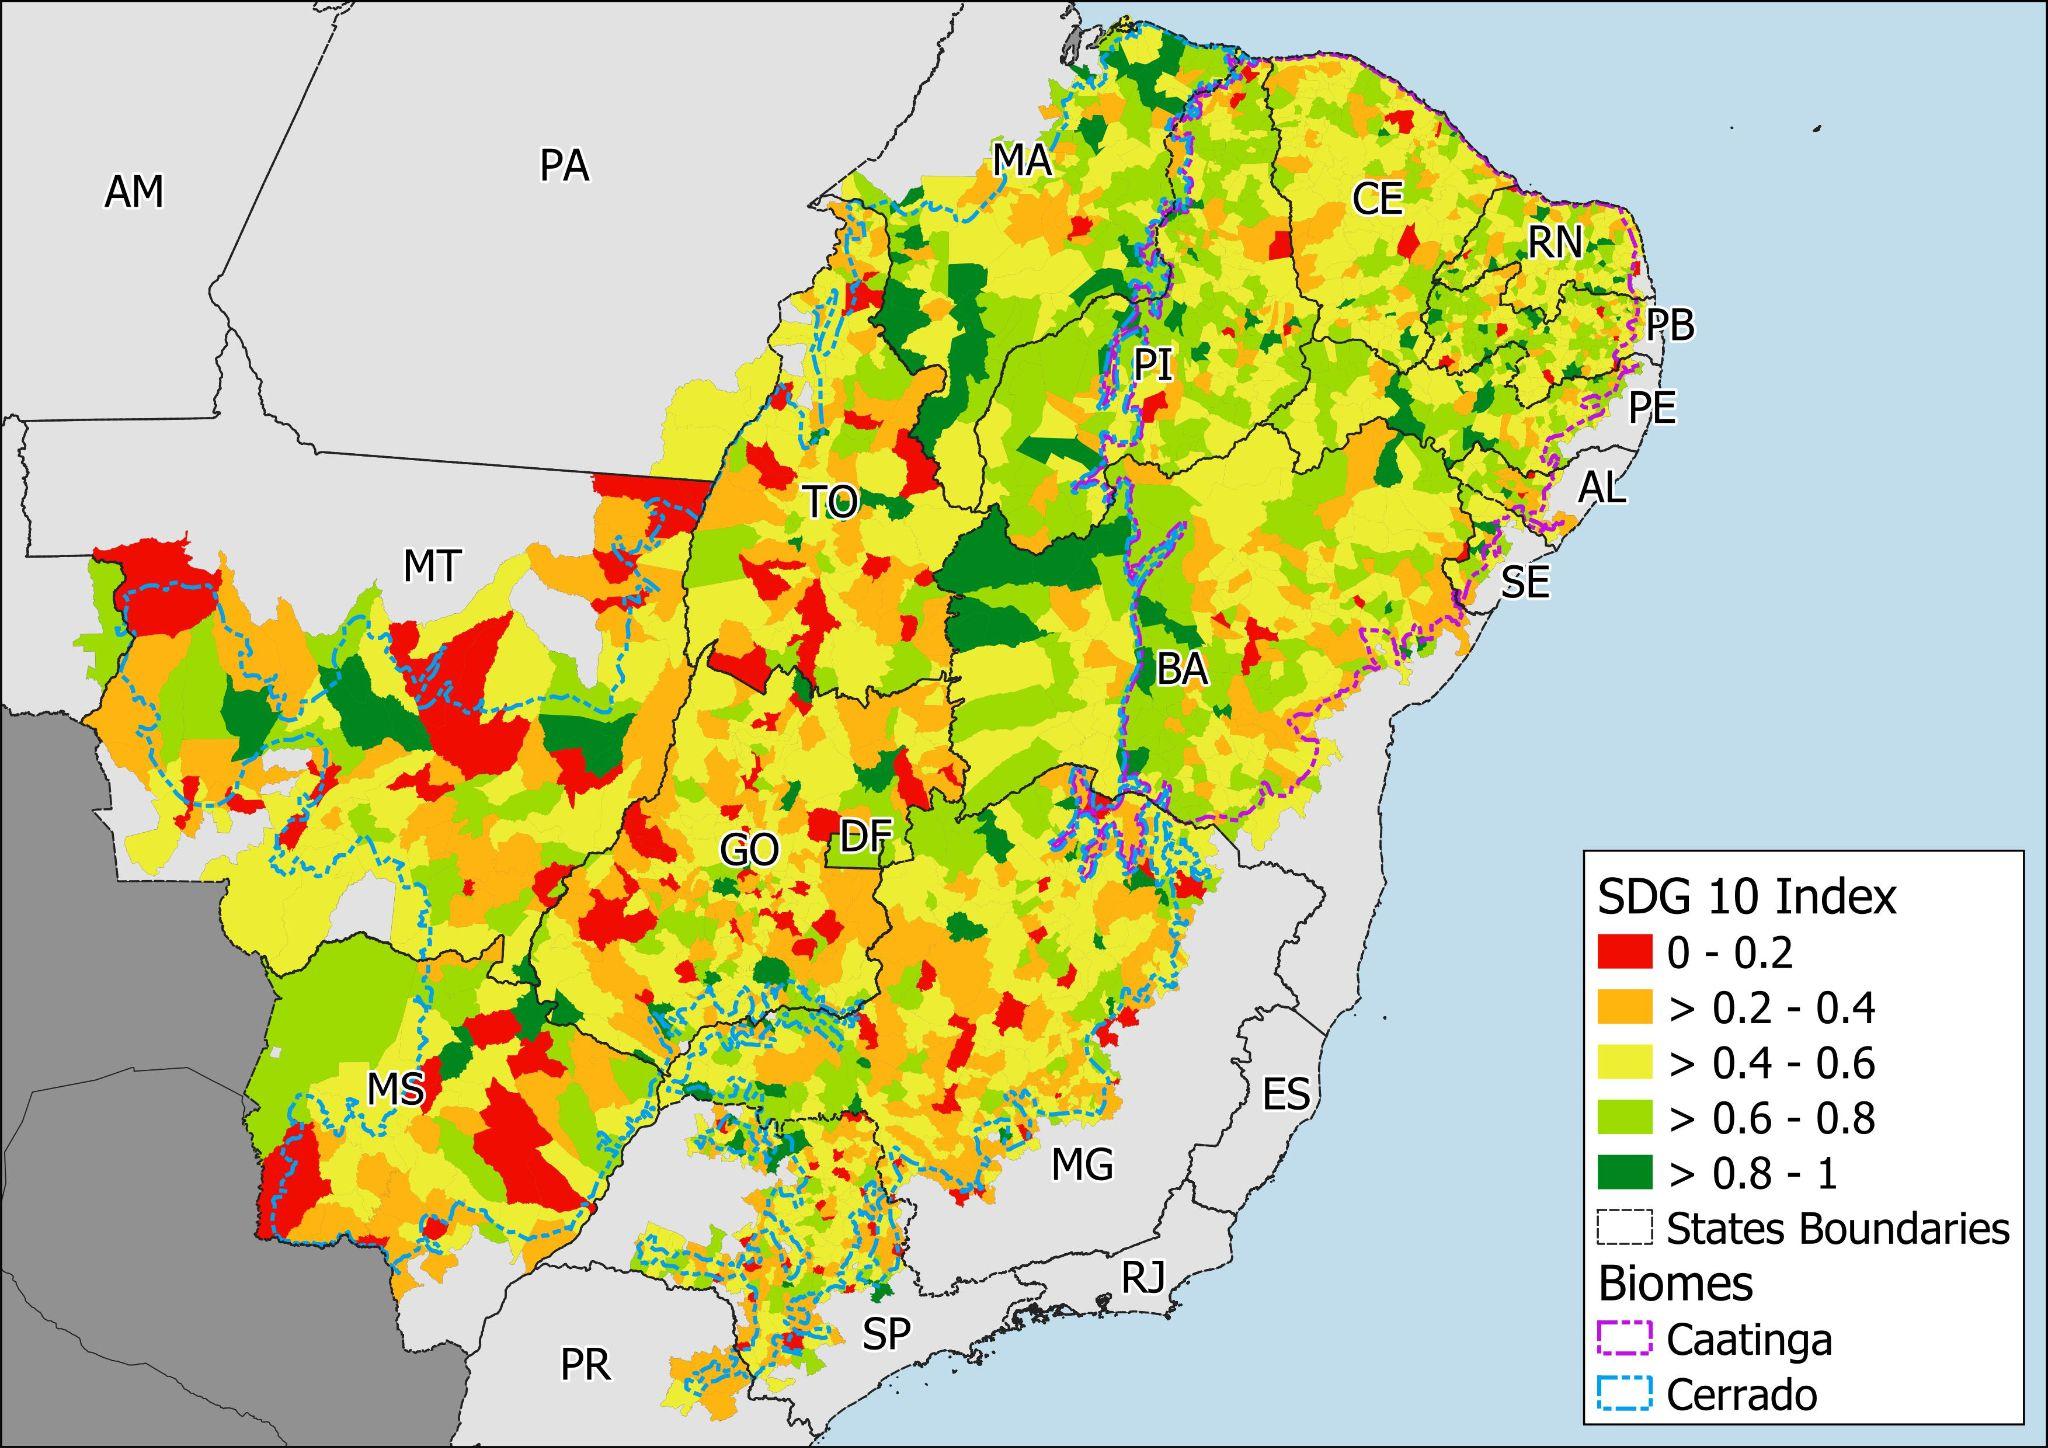


SDG 11 and 12 Index


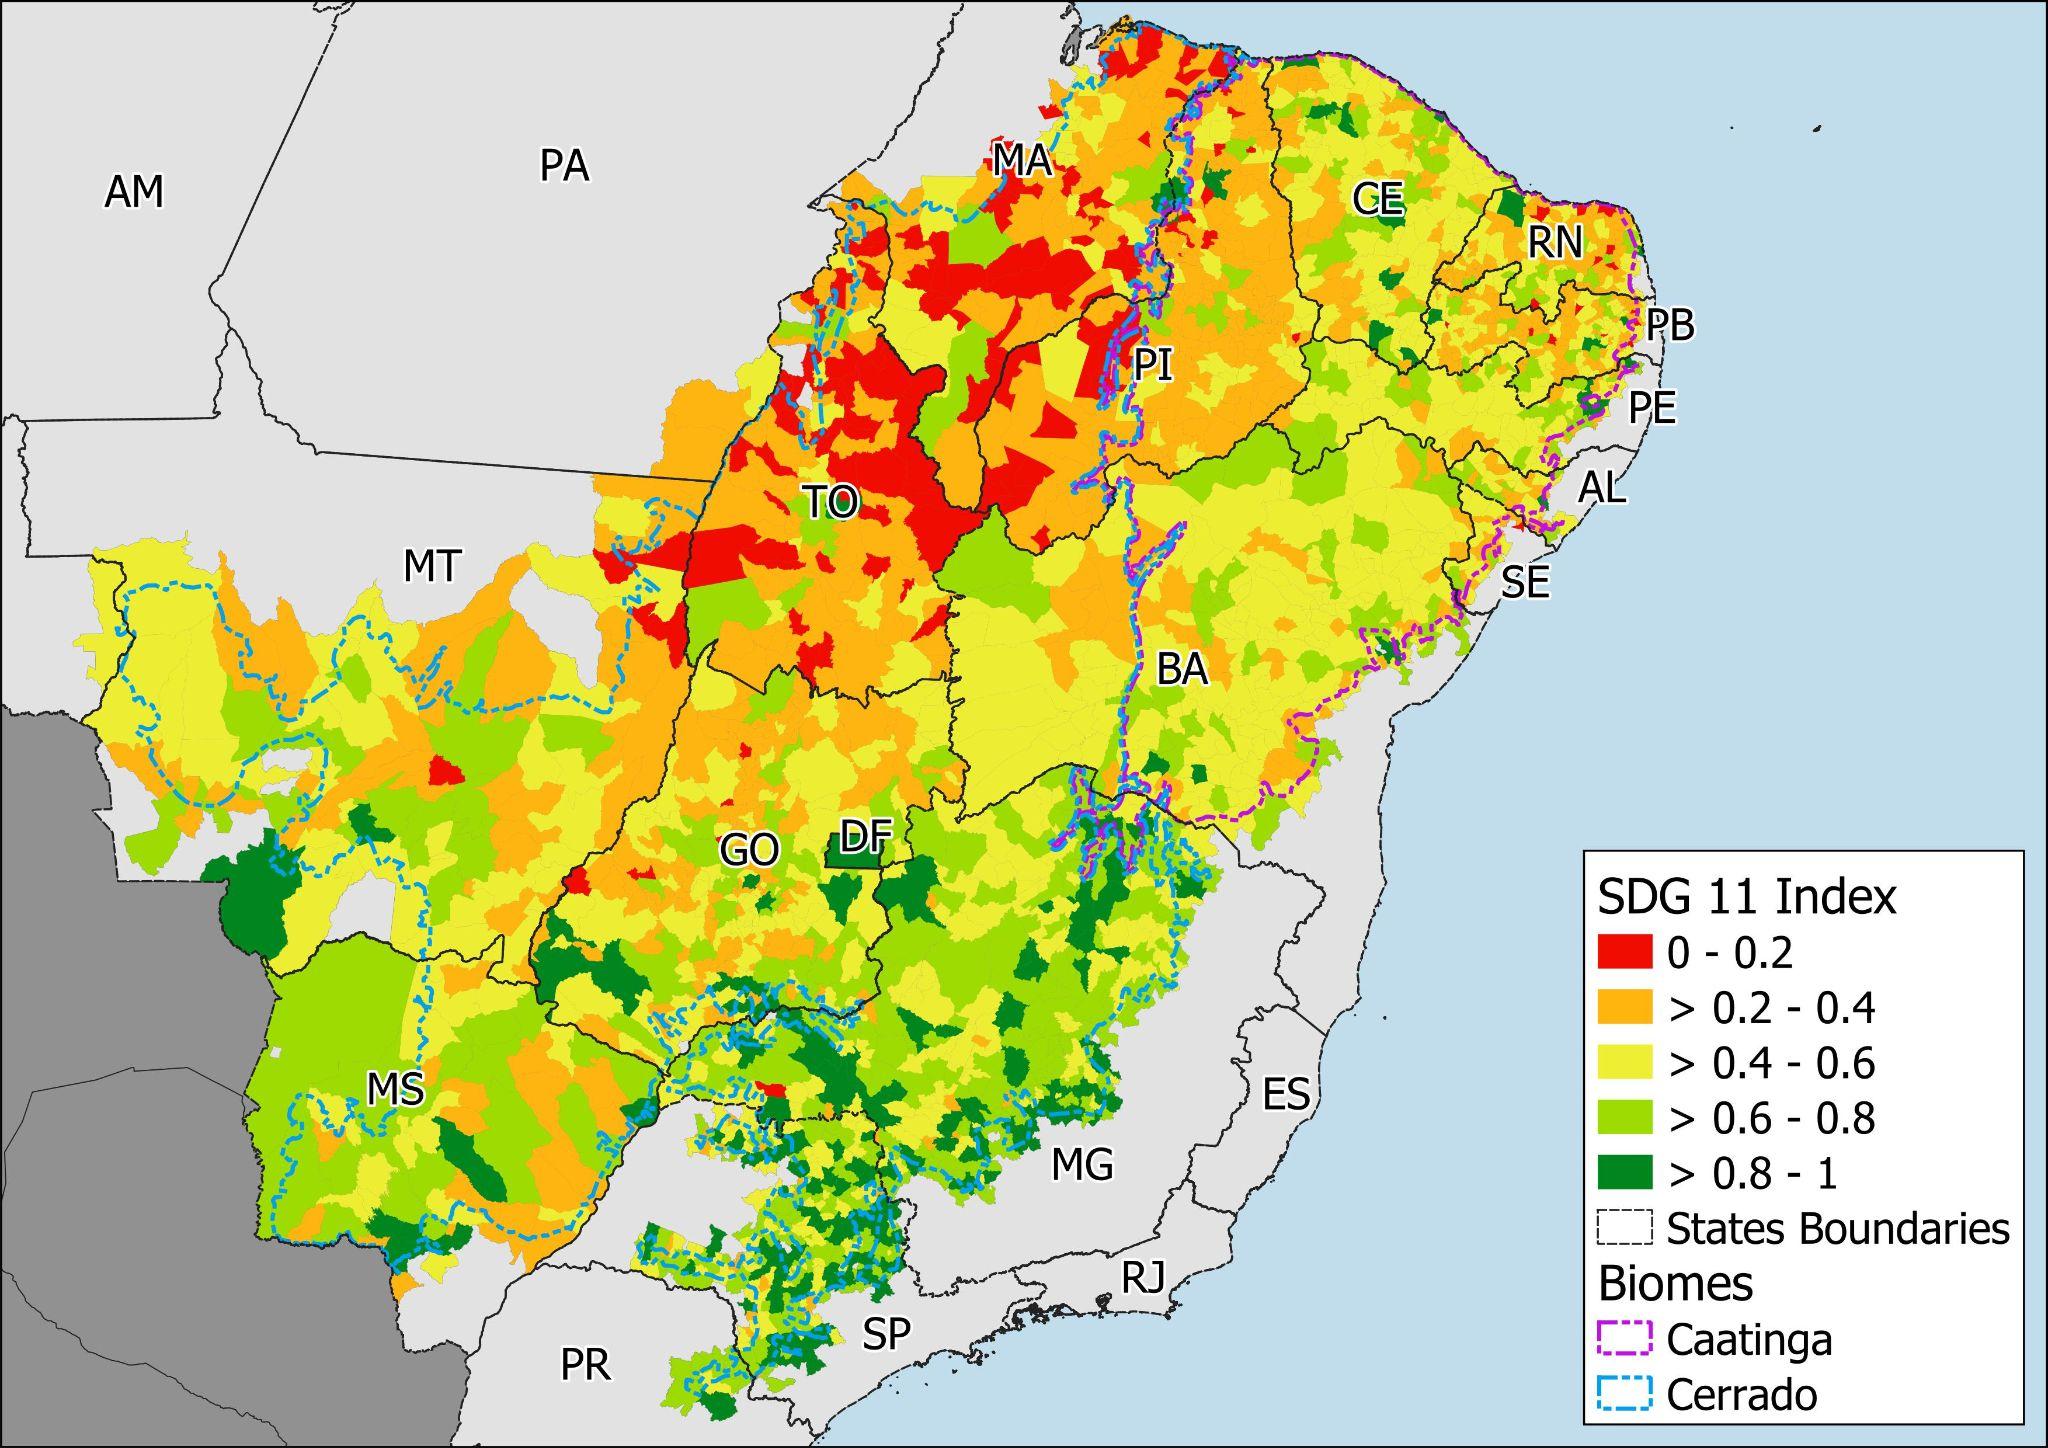

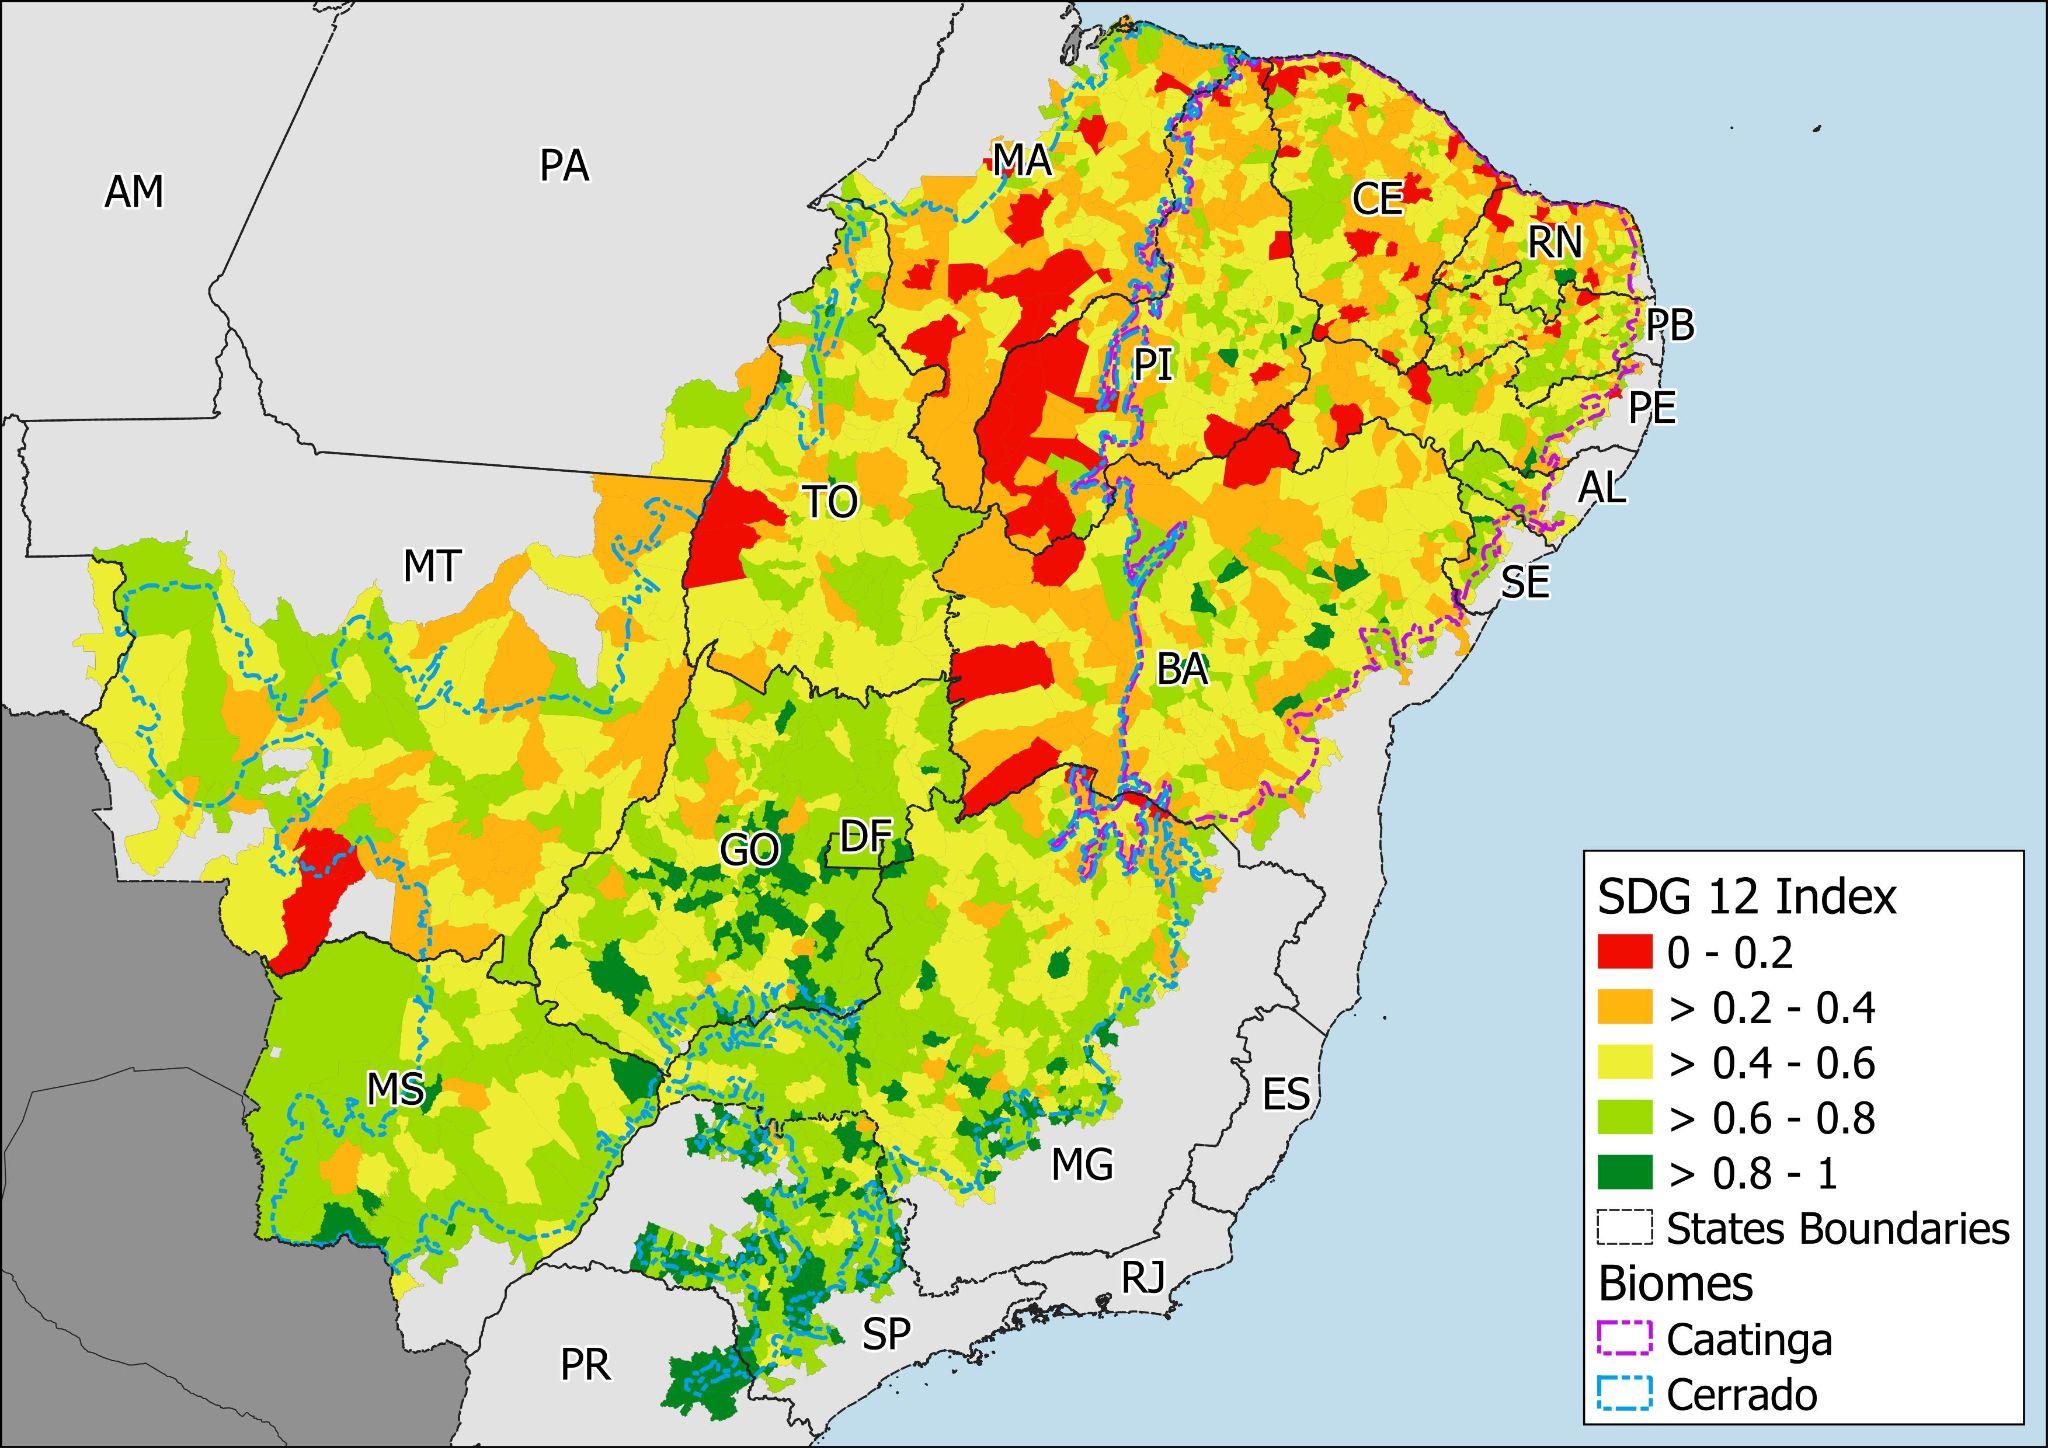


SDG 13 and 15 Index


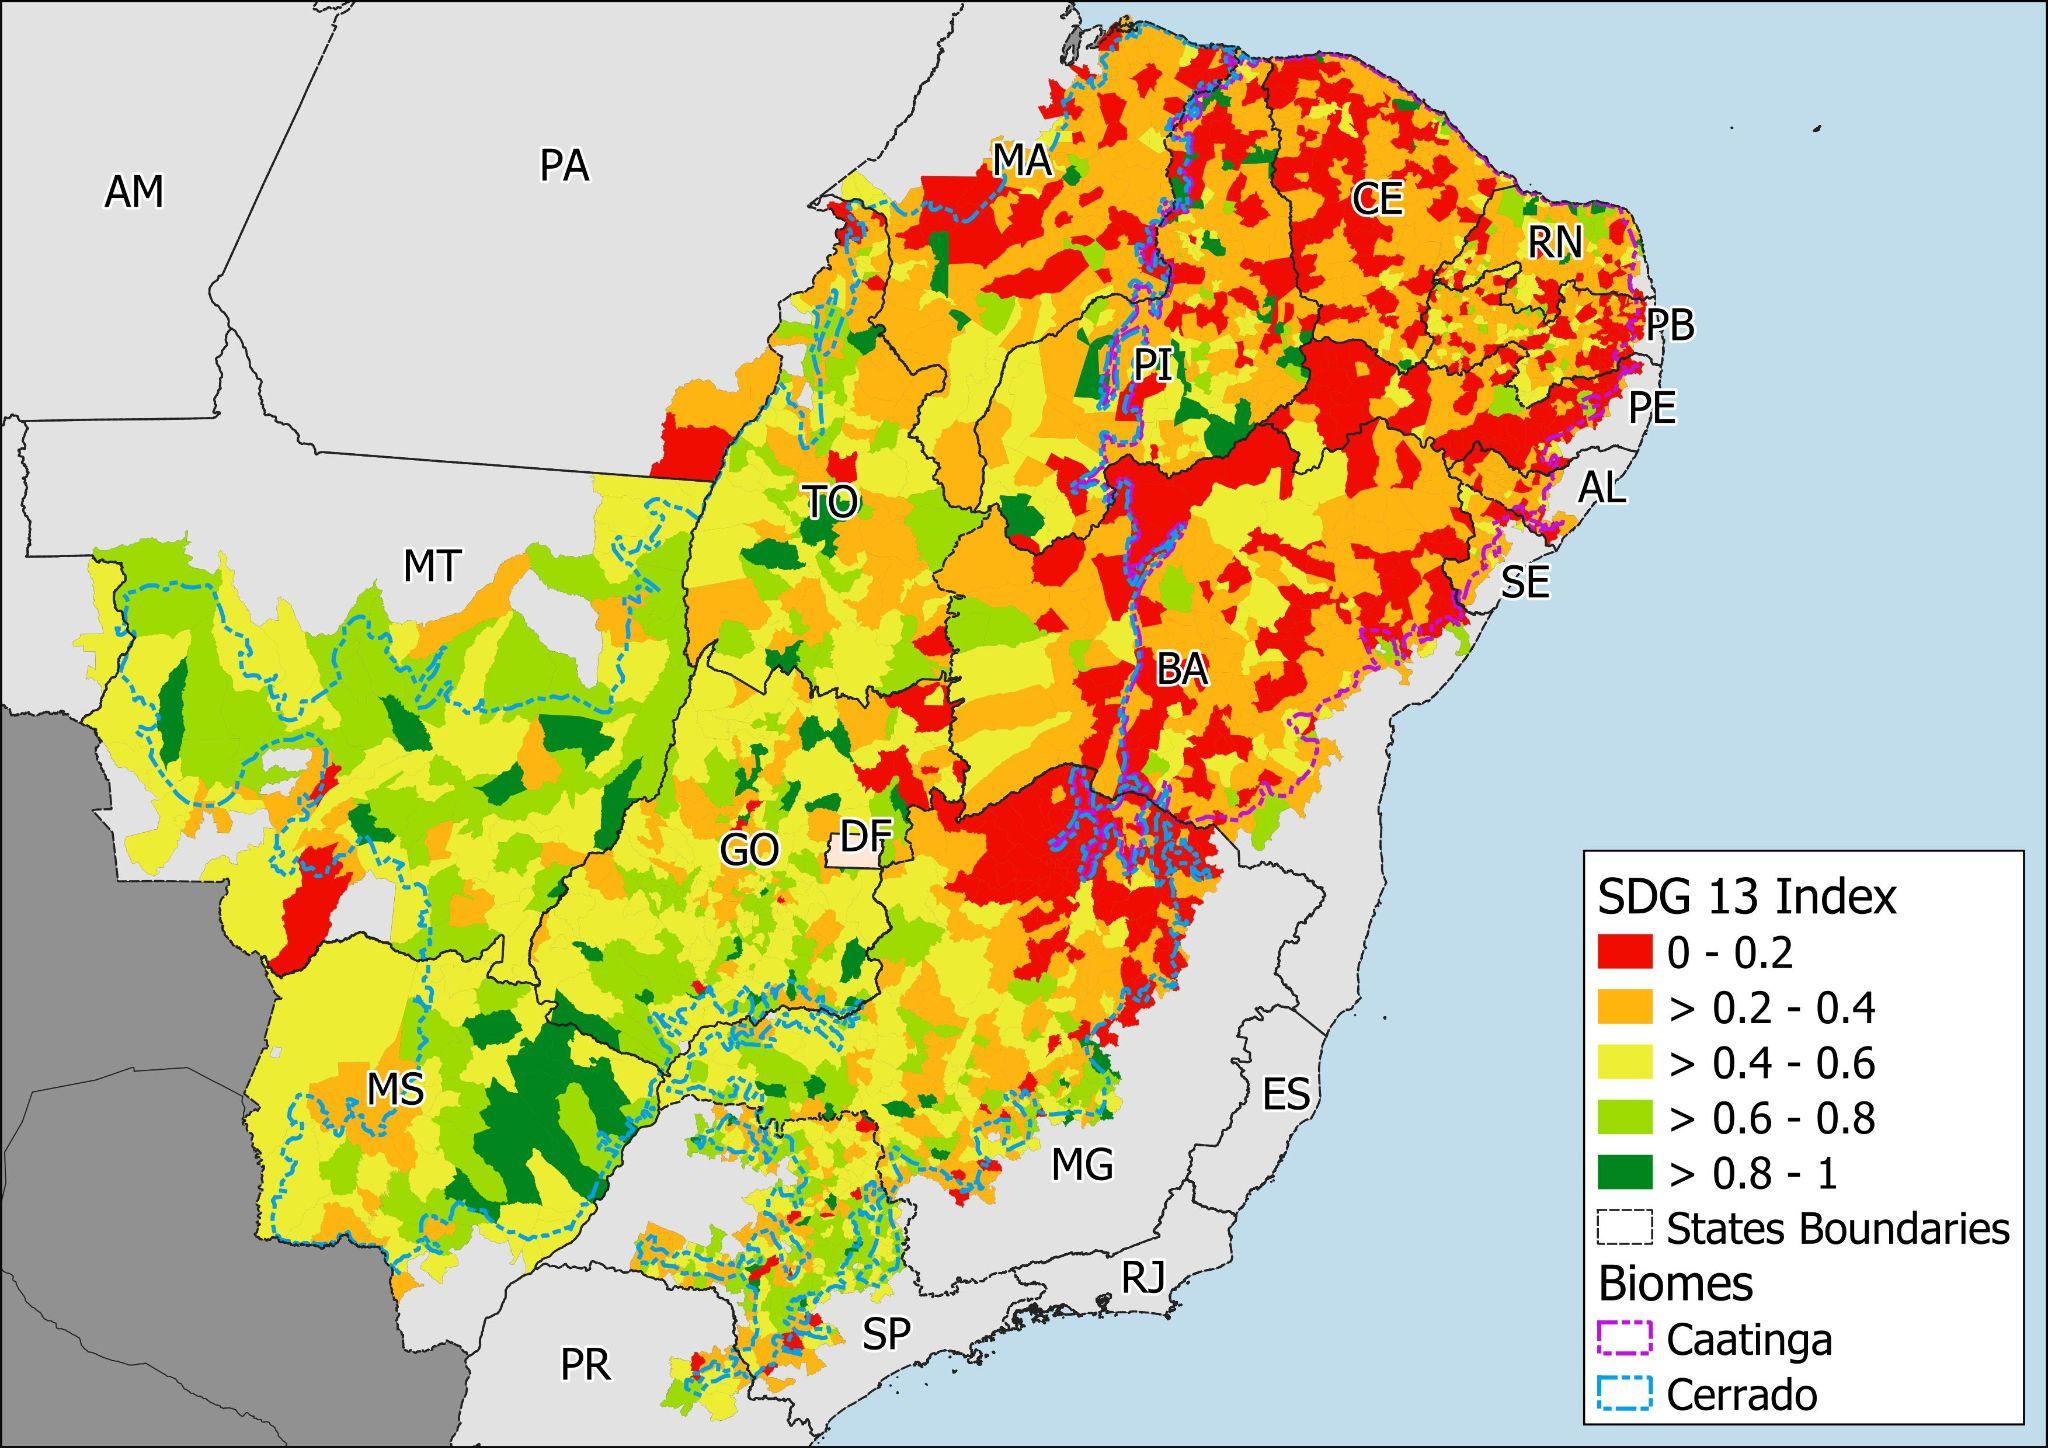

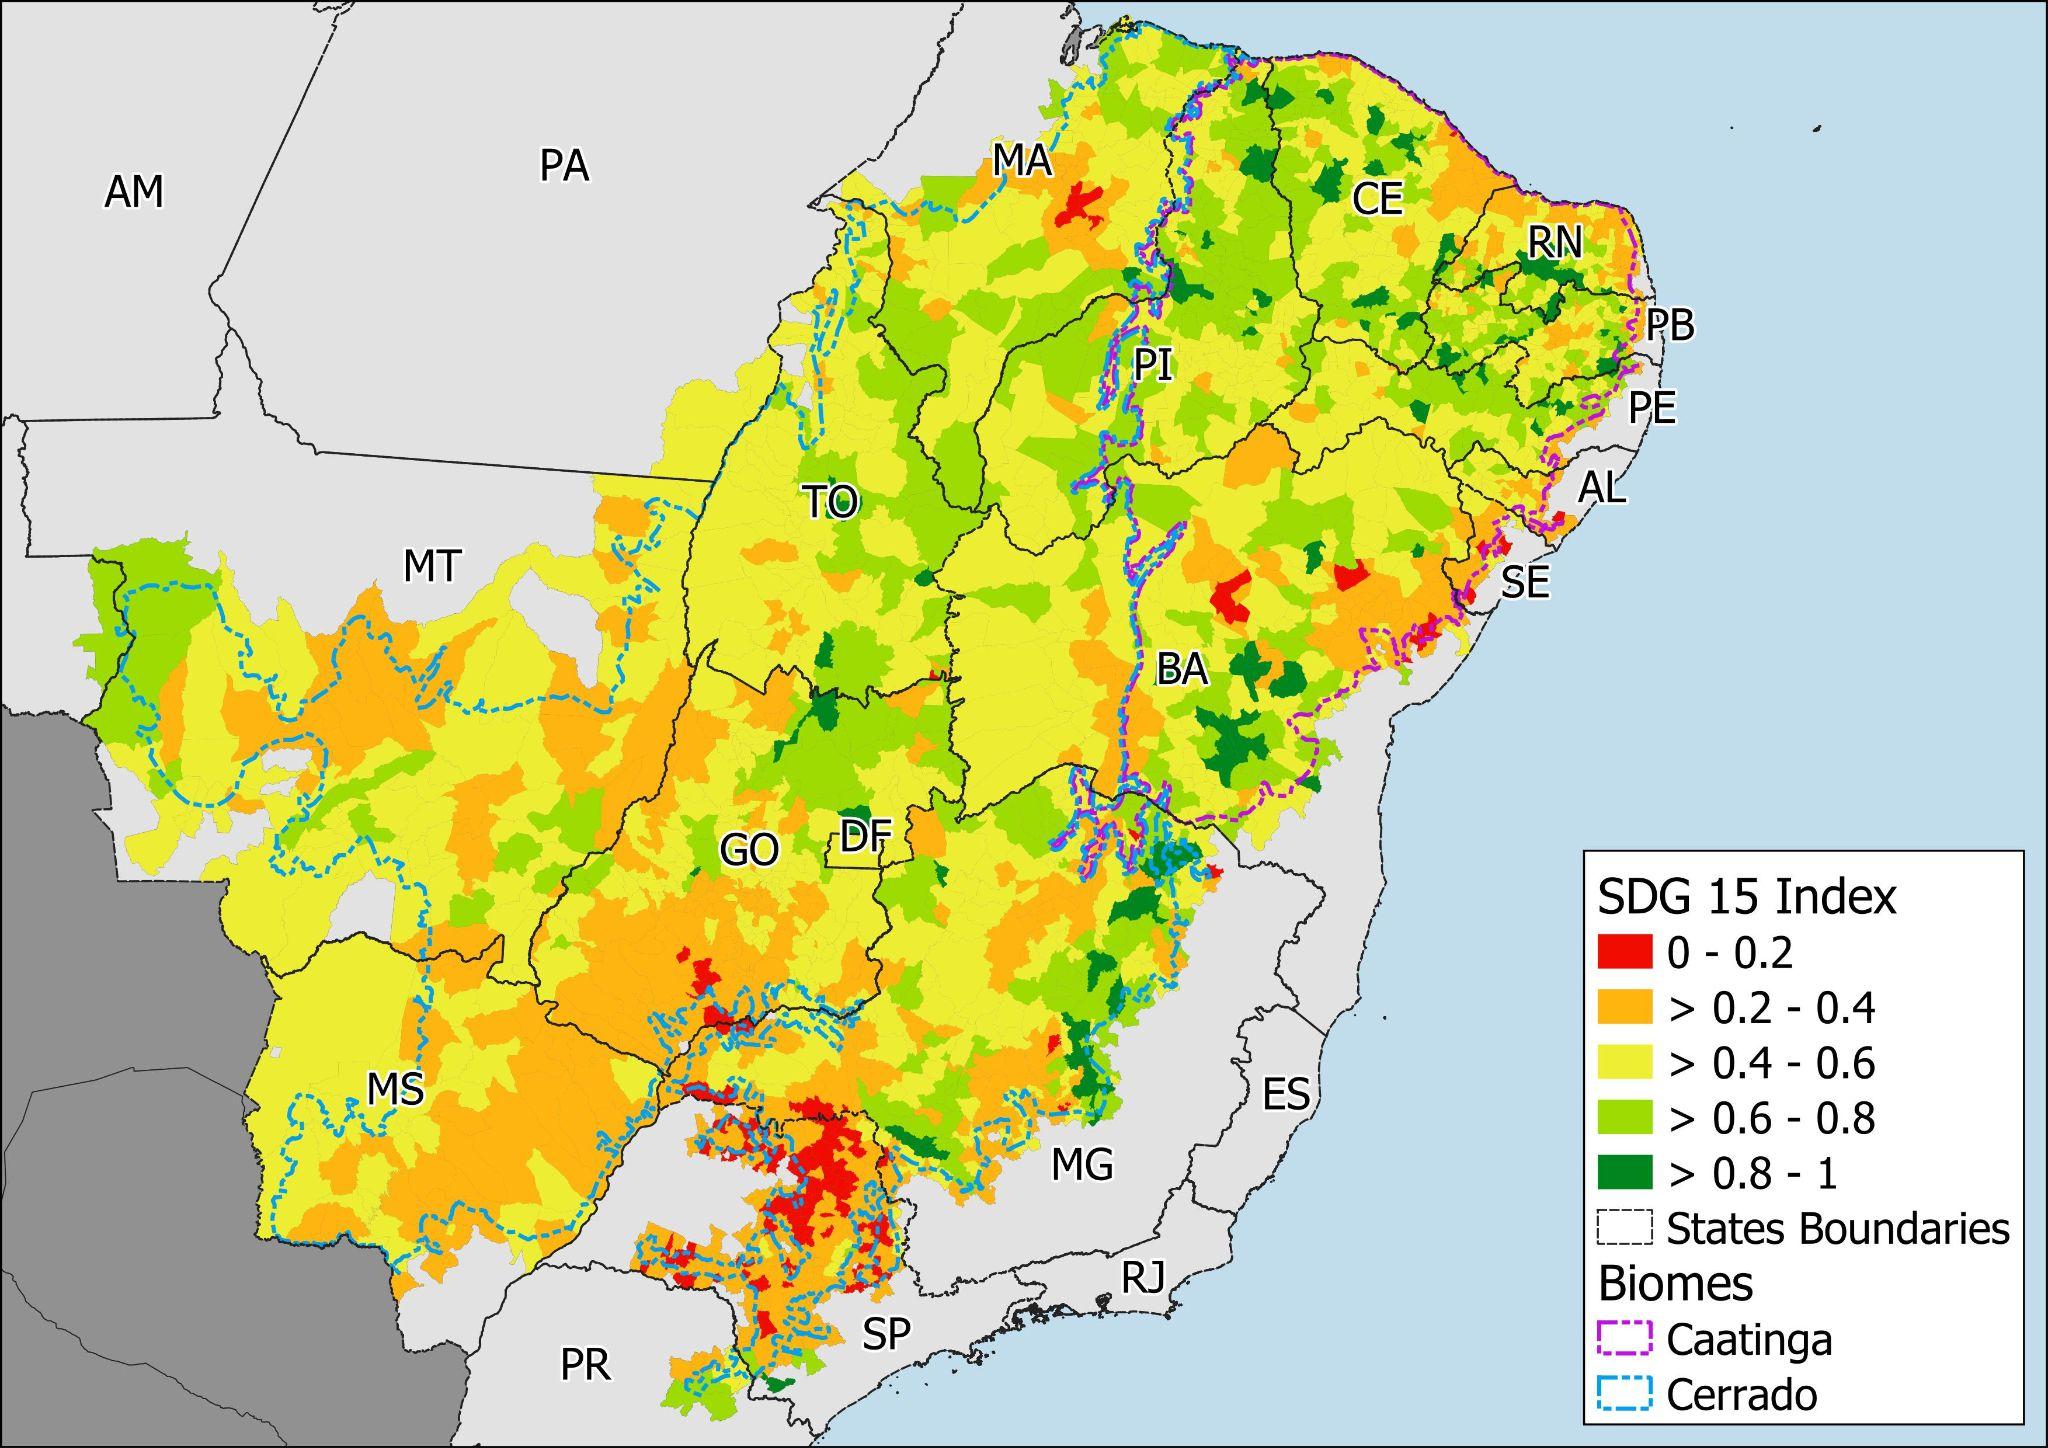


SDG 16 and 17 Index


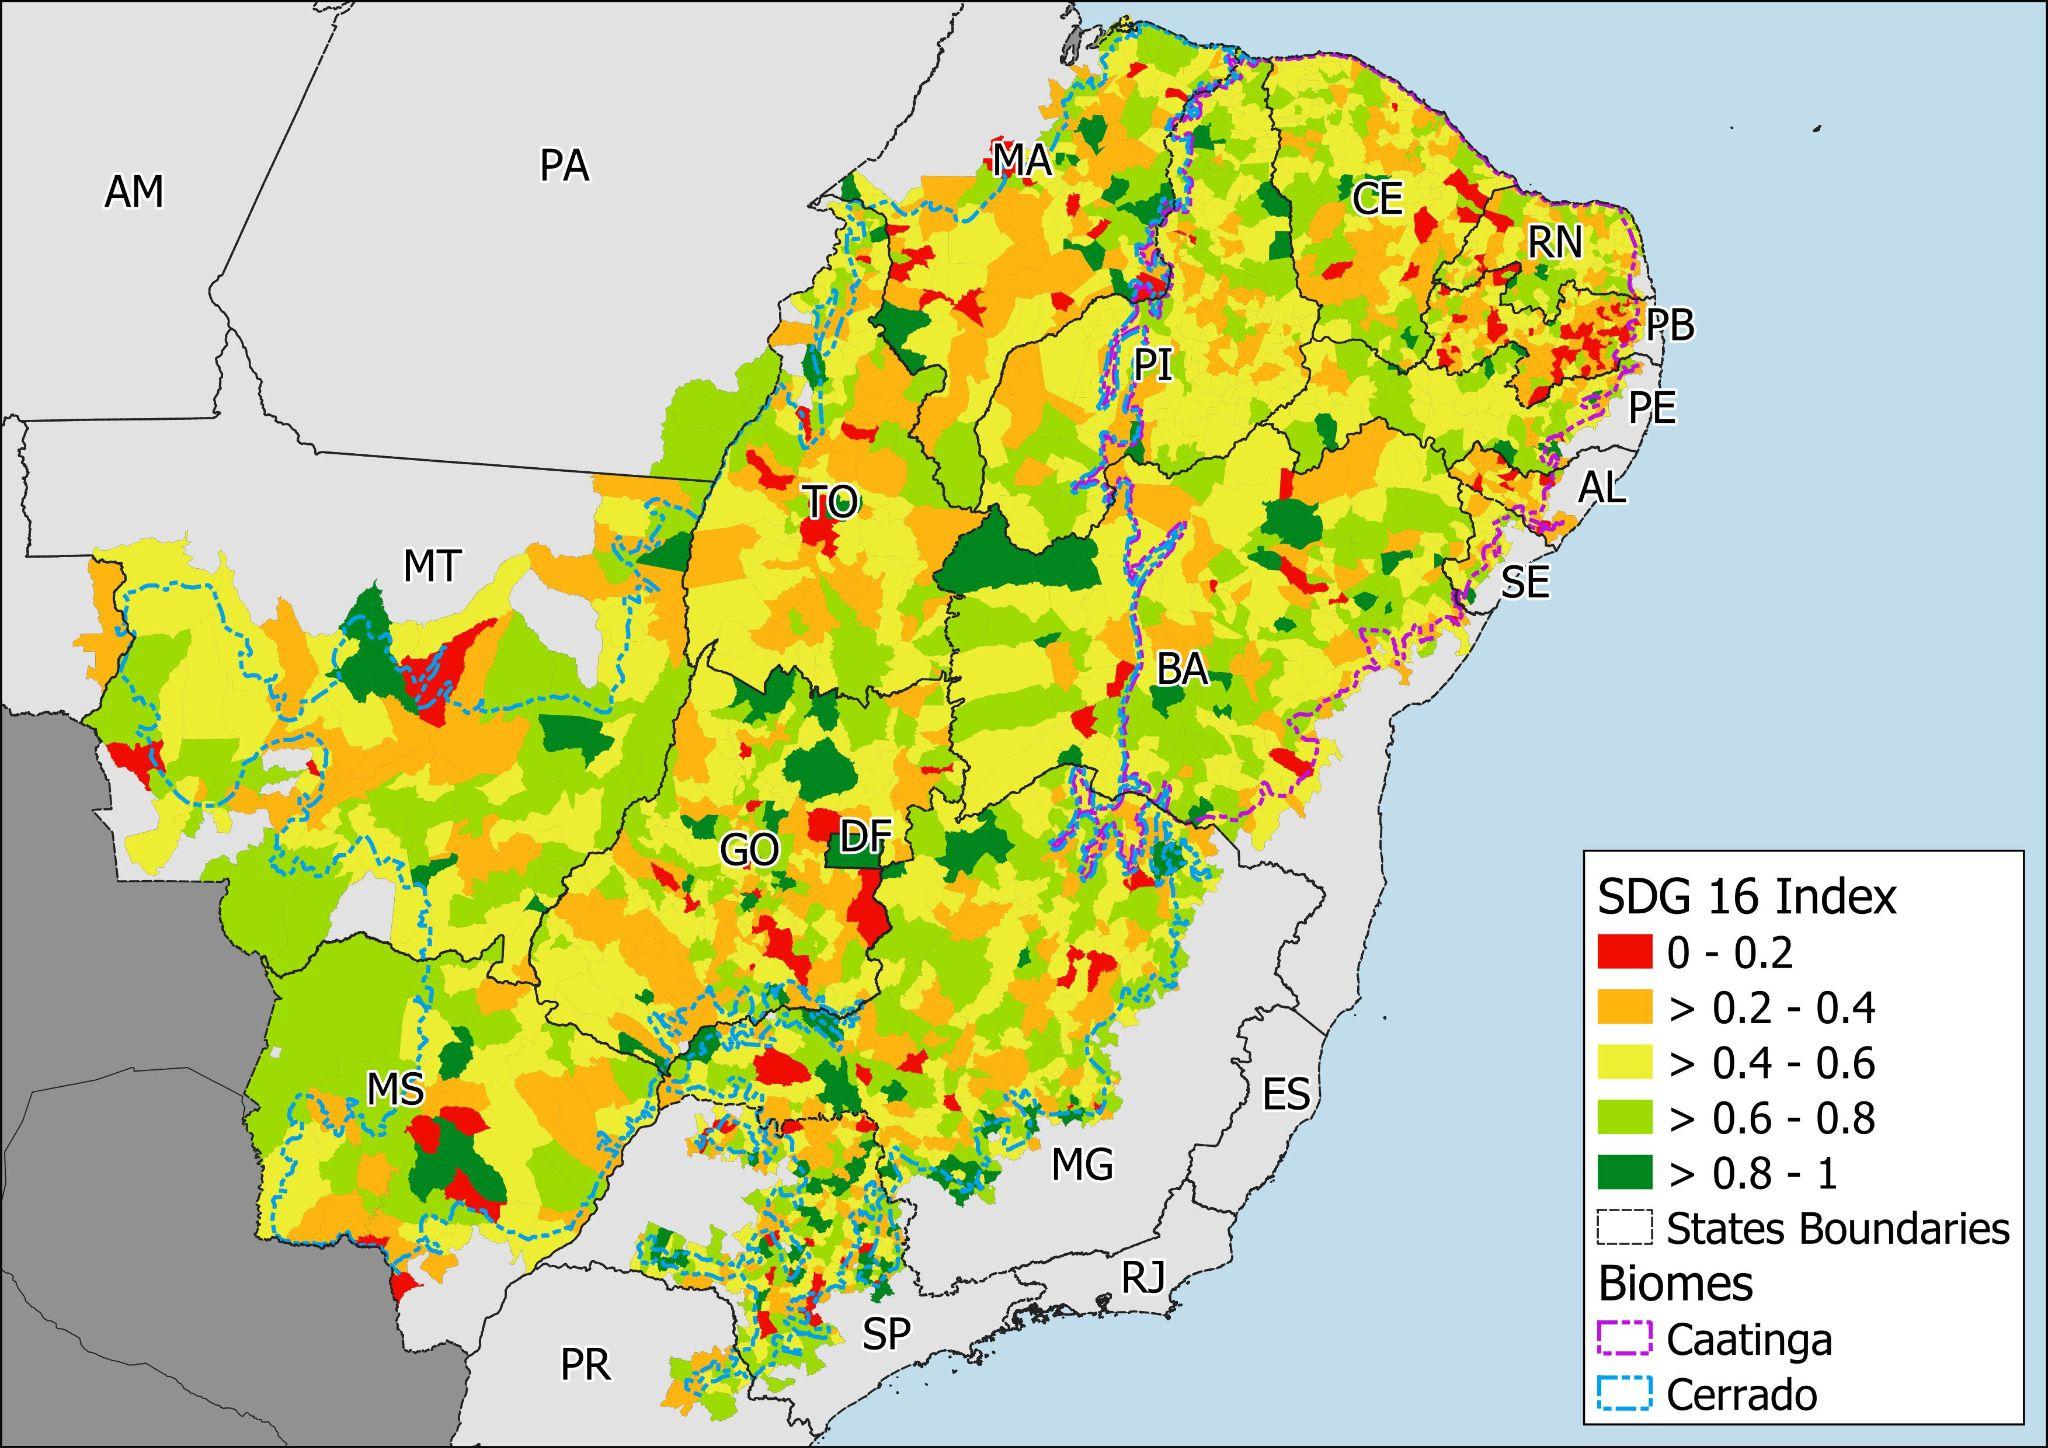

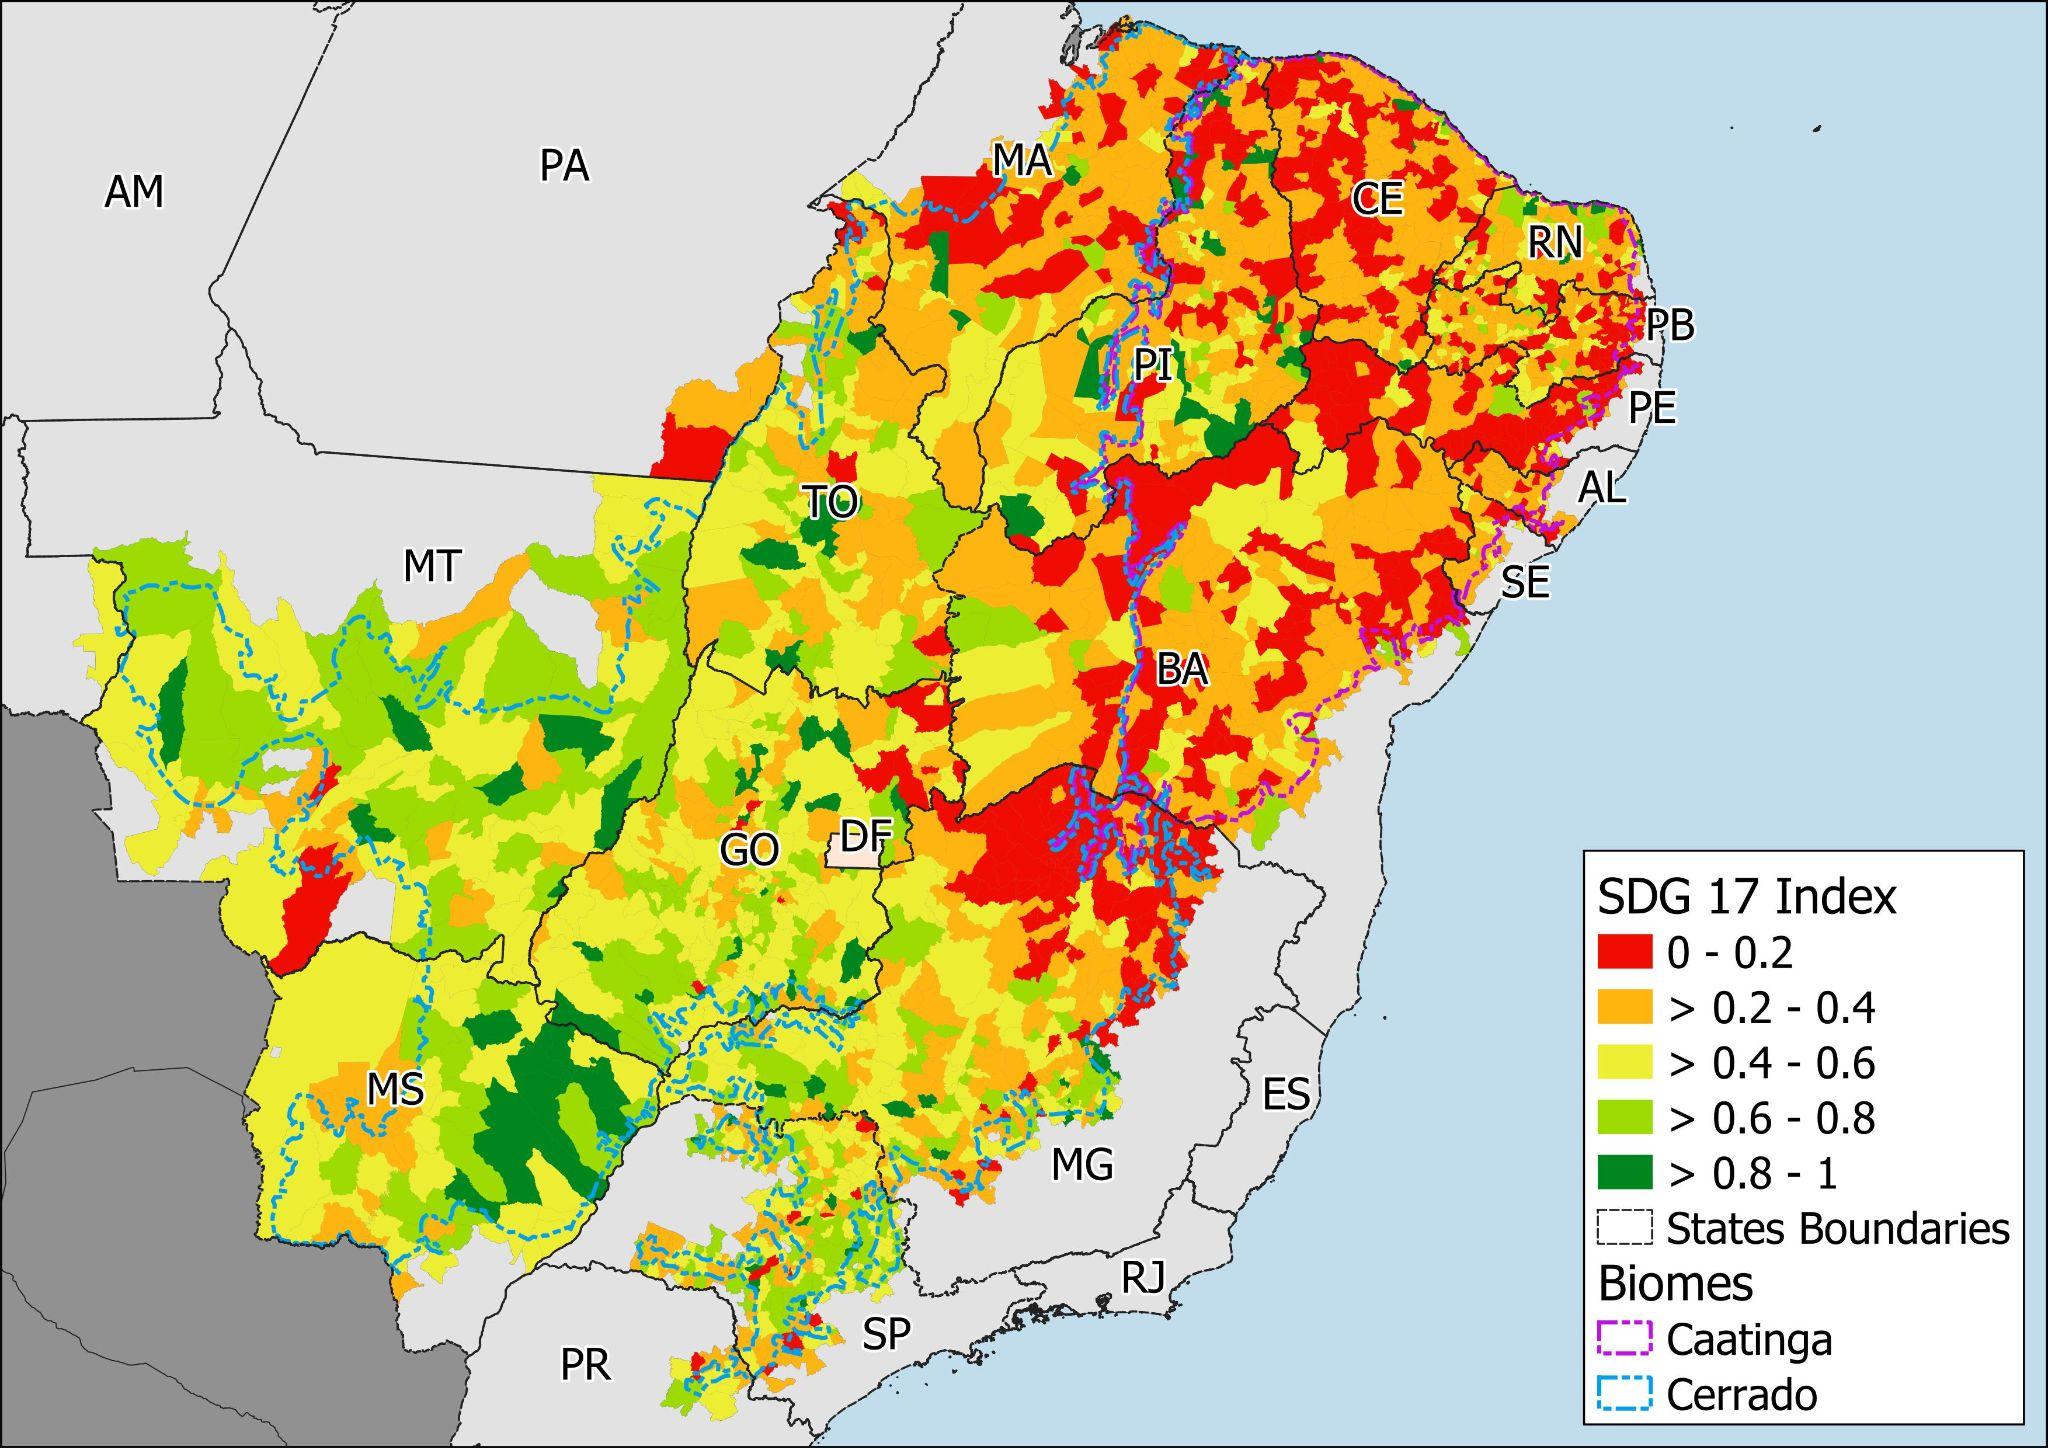


**Sensitivity analysis patterns to governance indicators for each SDG**

Index loss without governance - SDG 01 and 02


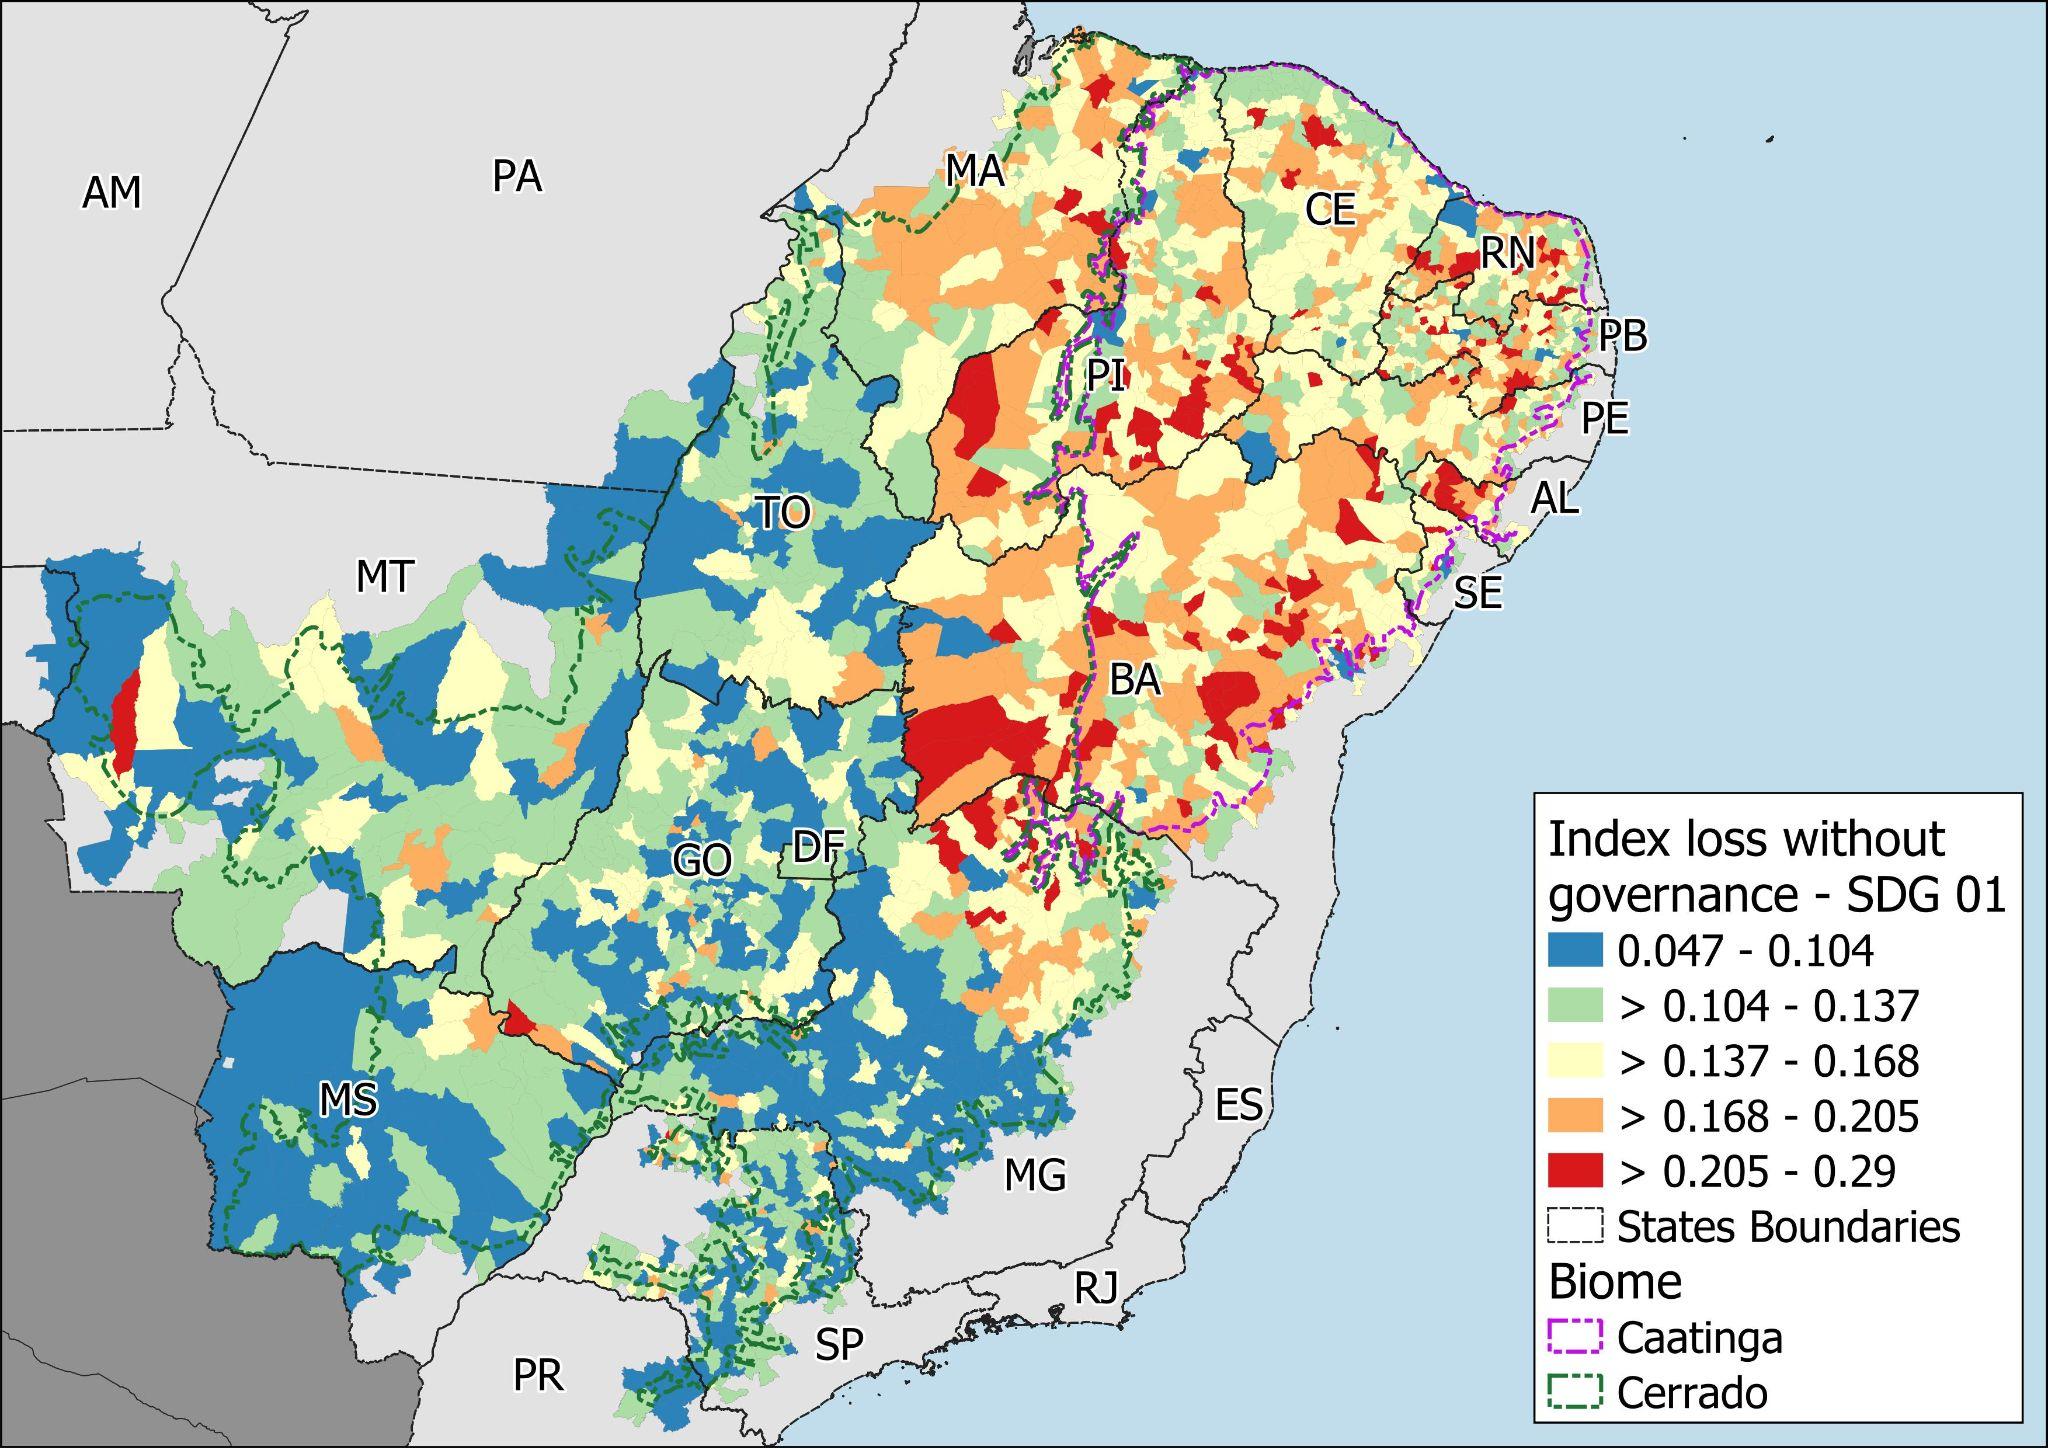

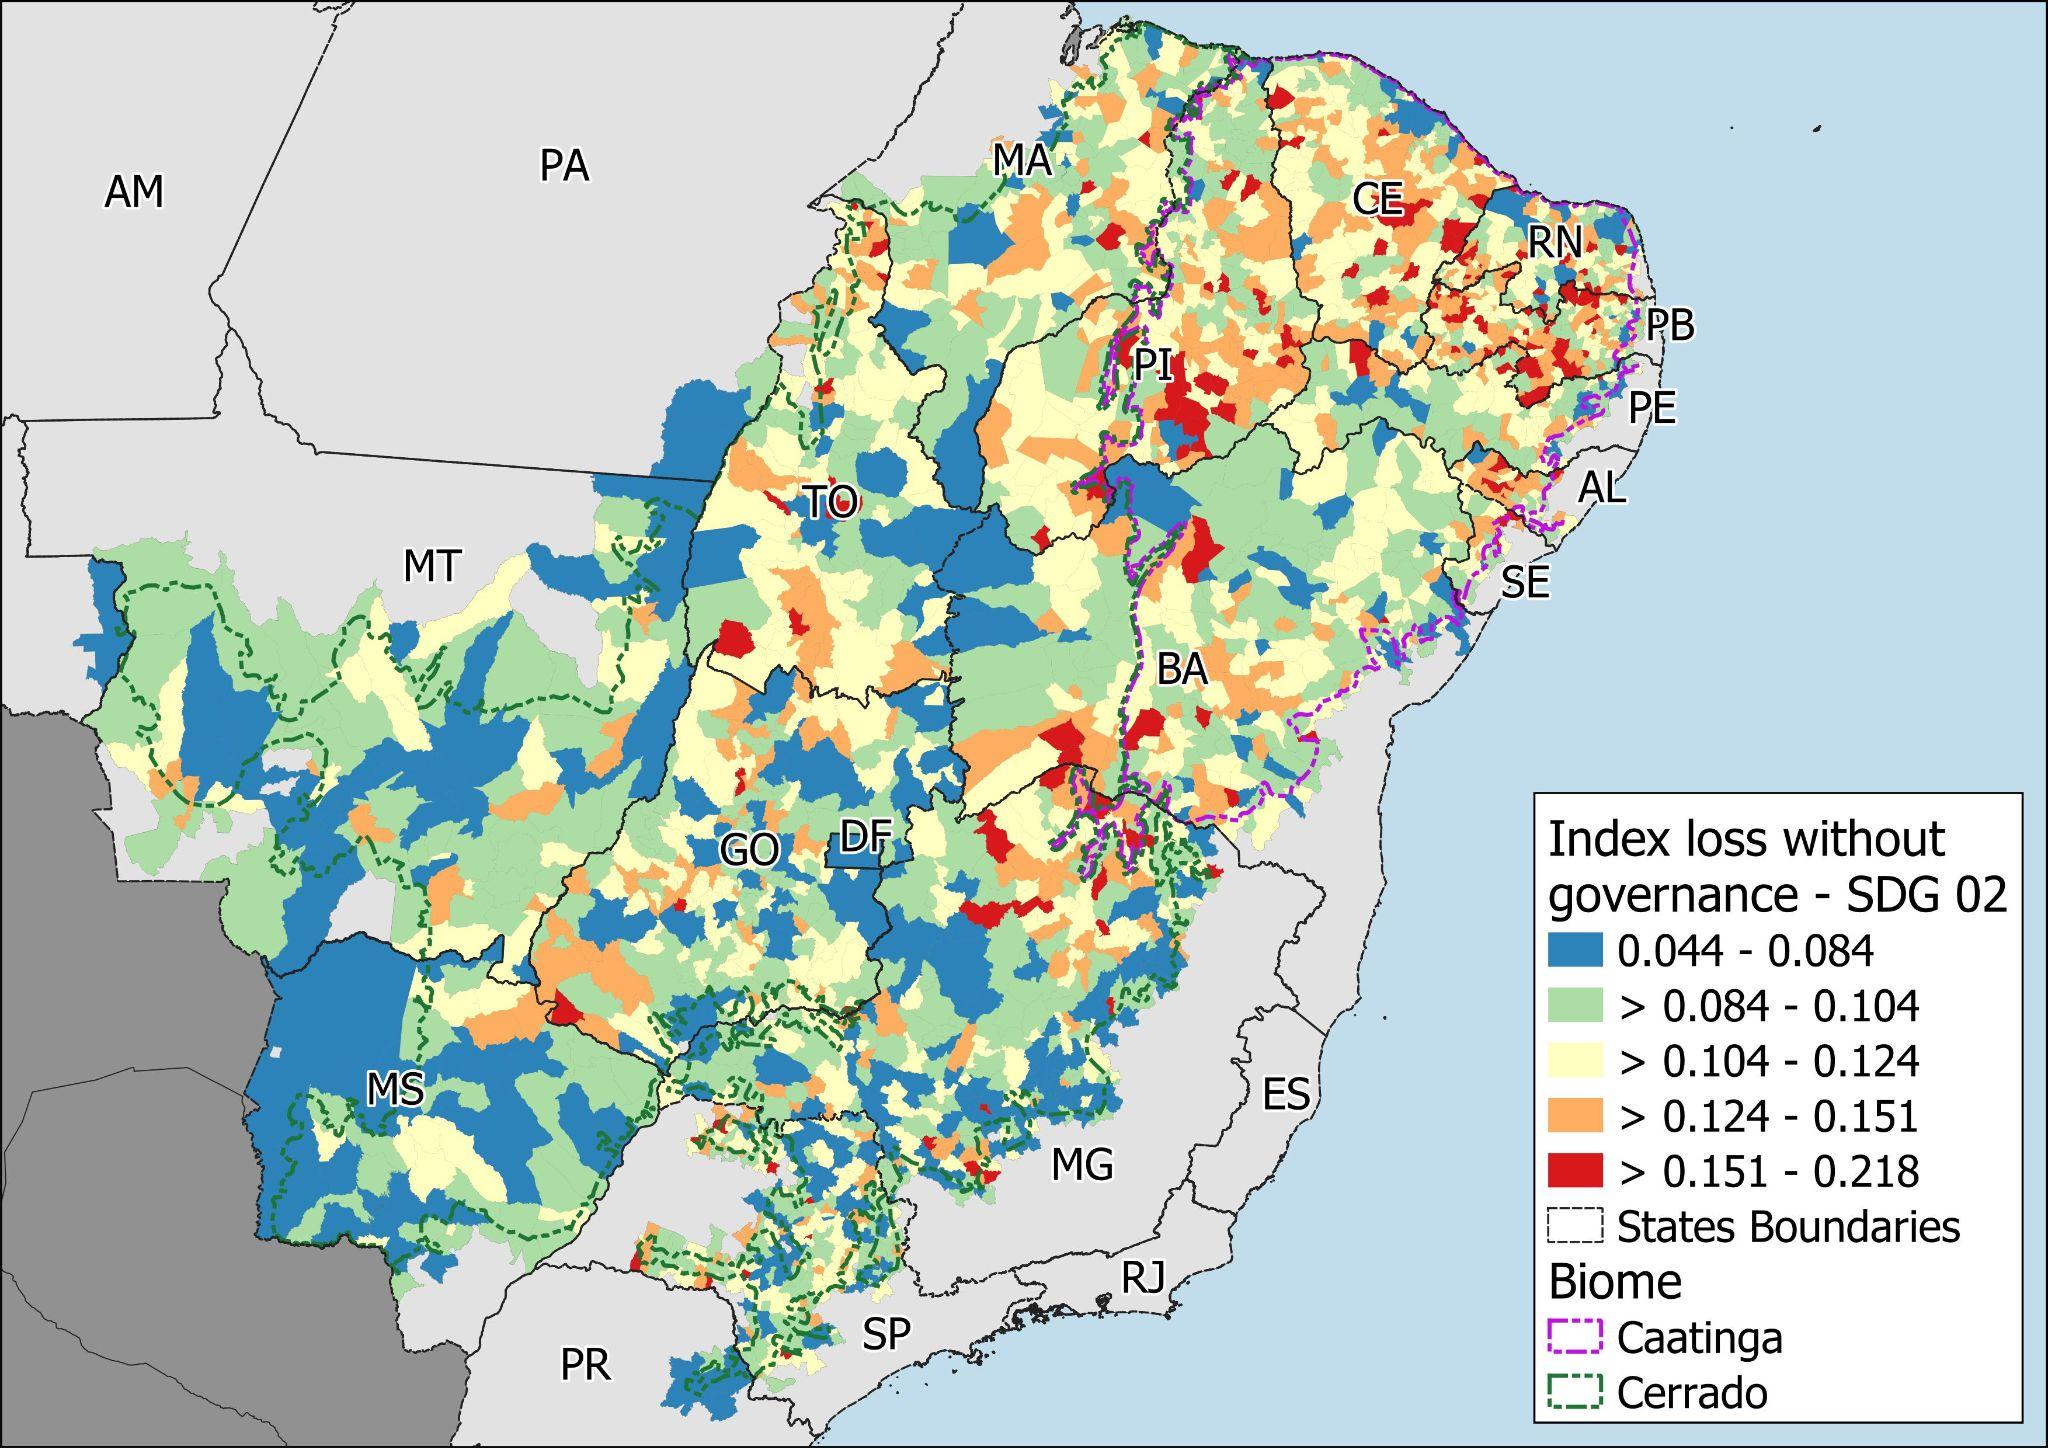


Index loss without governance - SDG 03 and 04


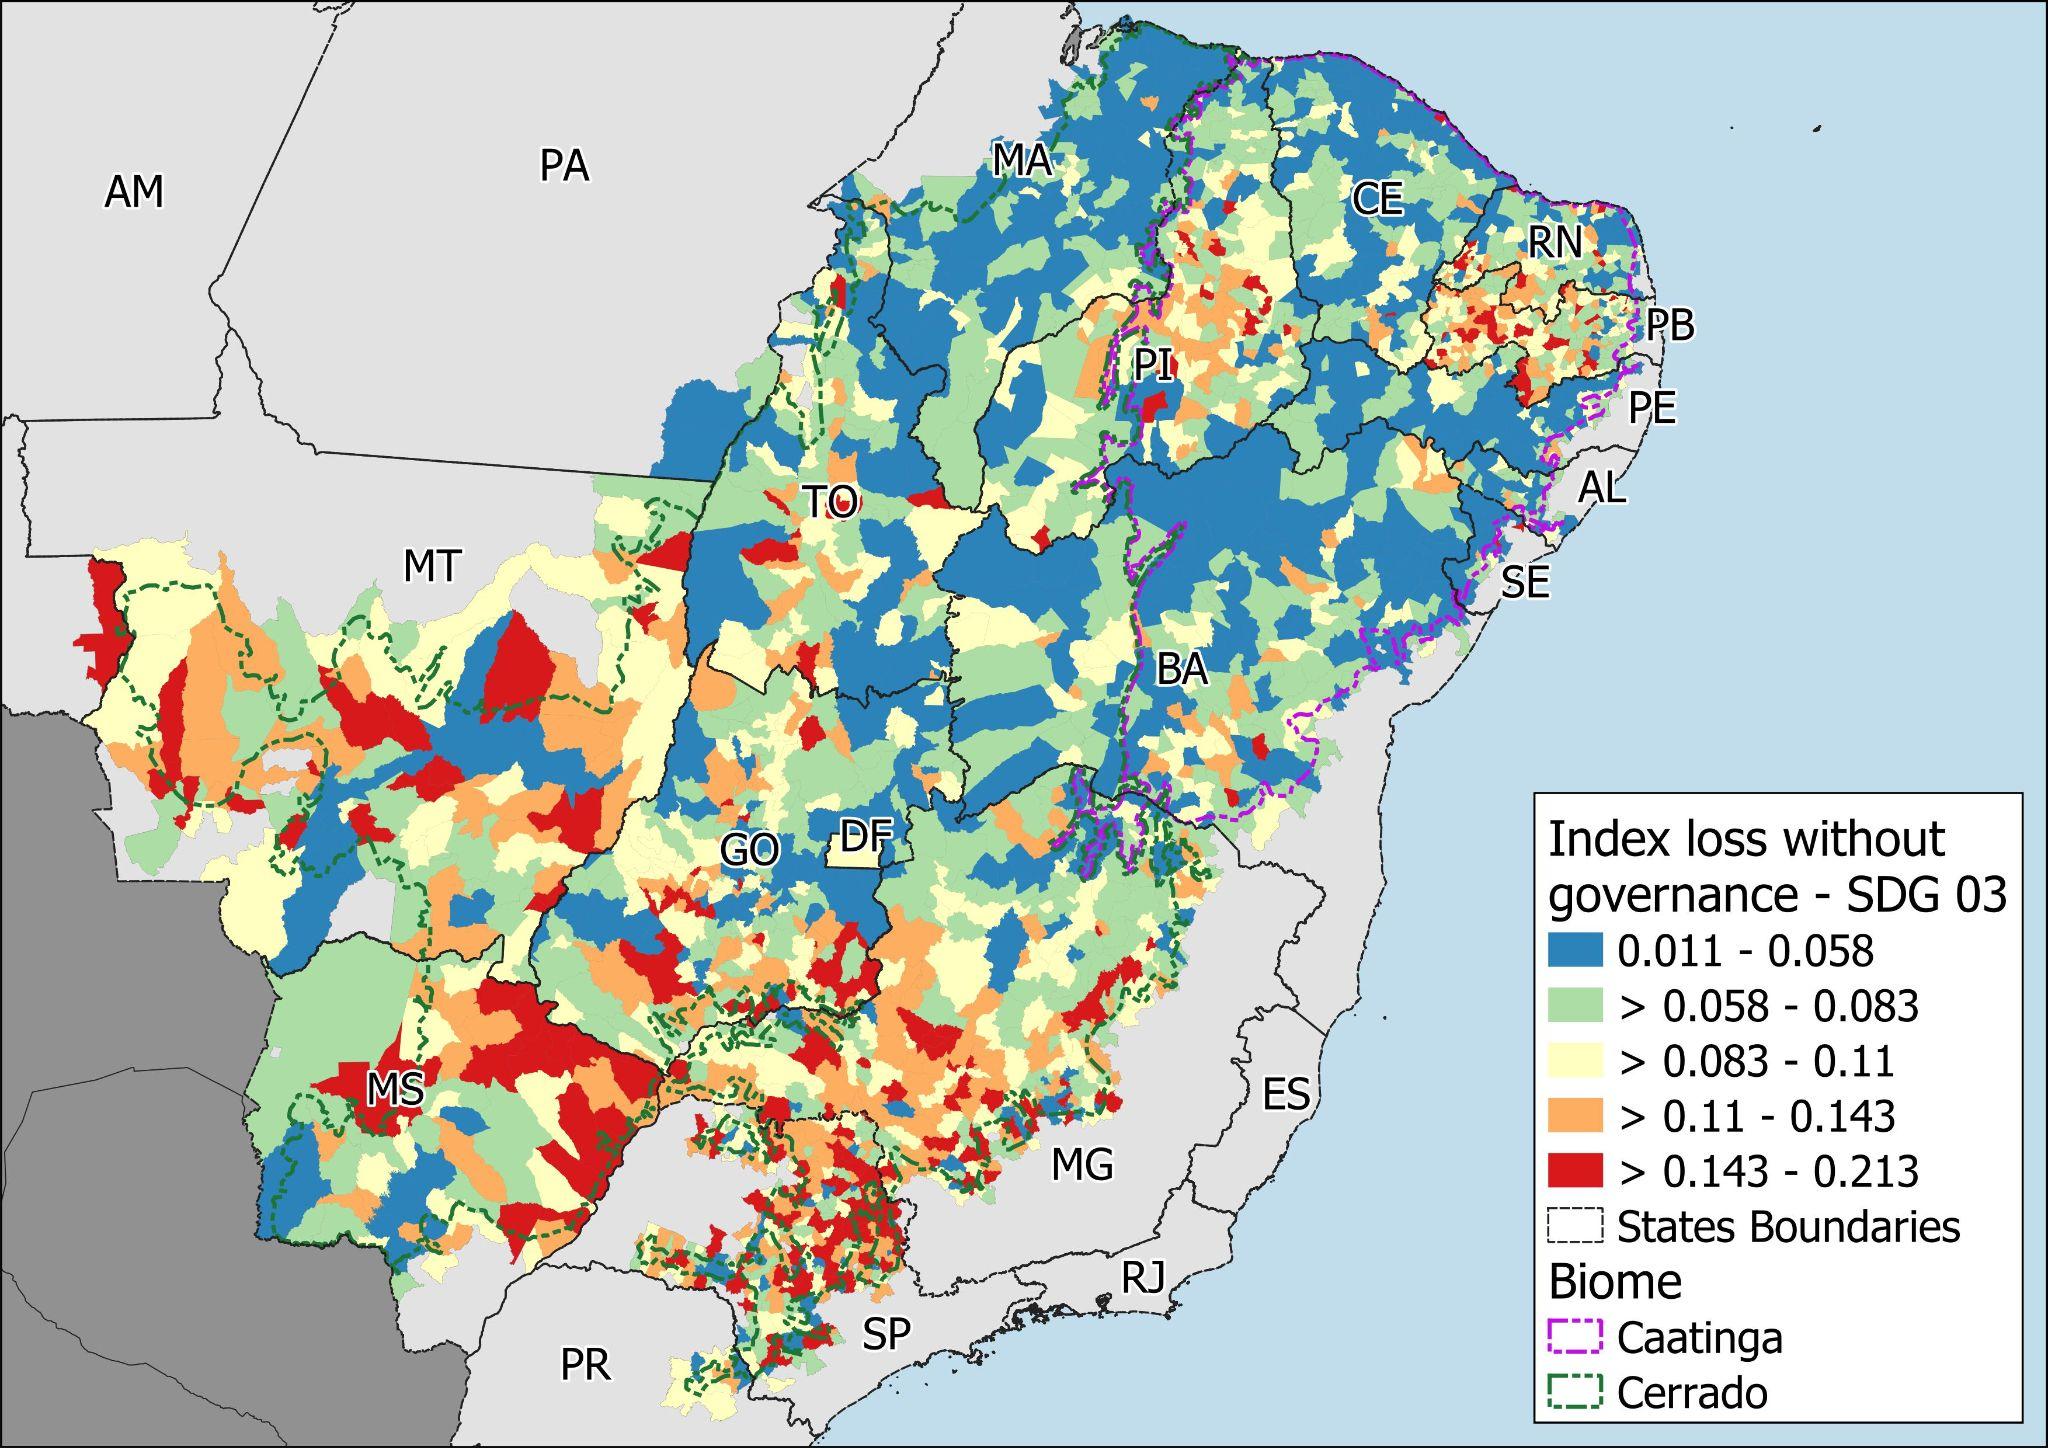

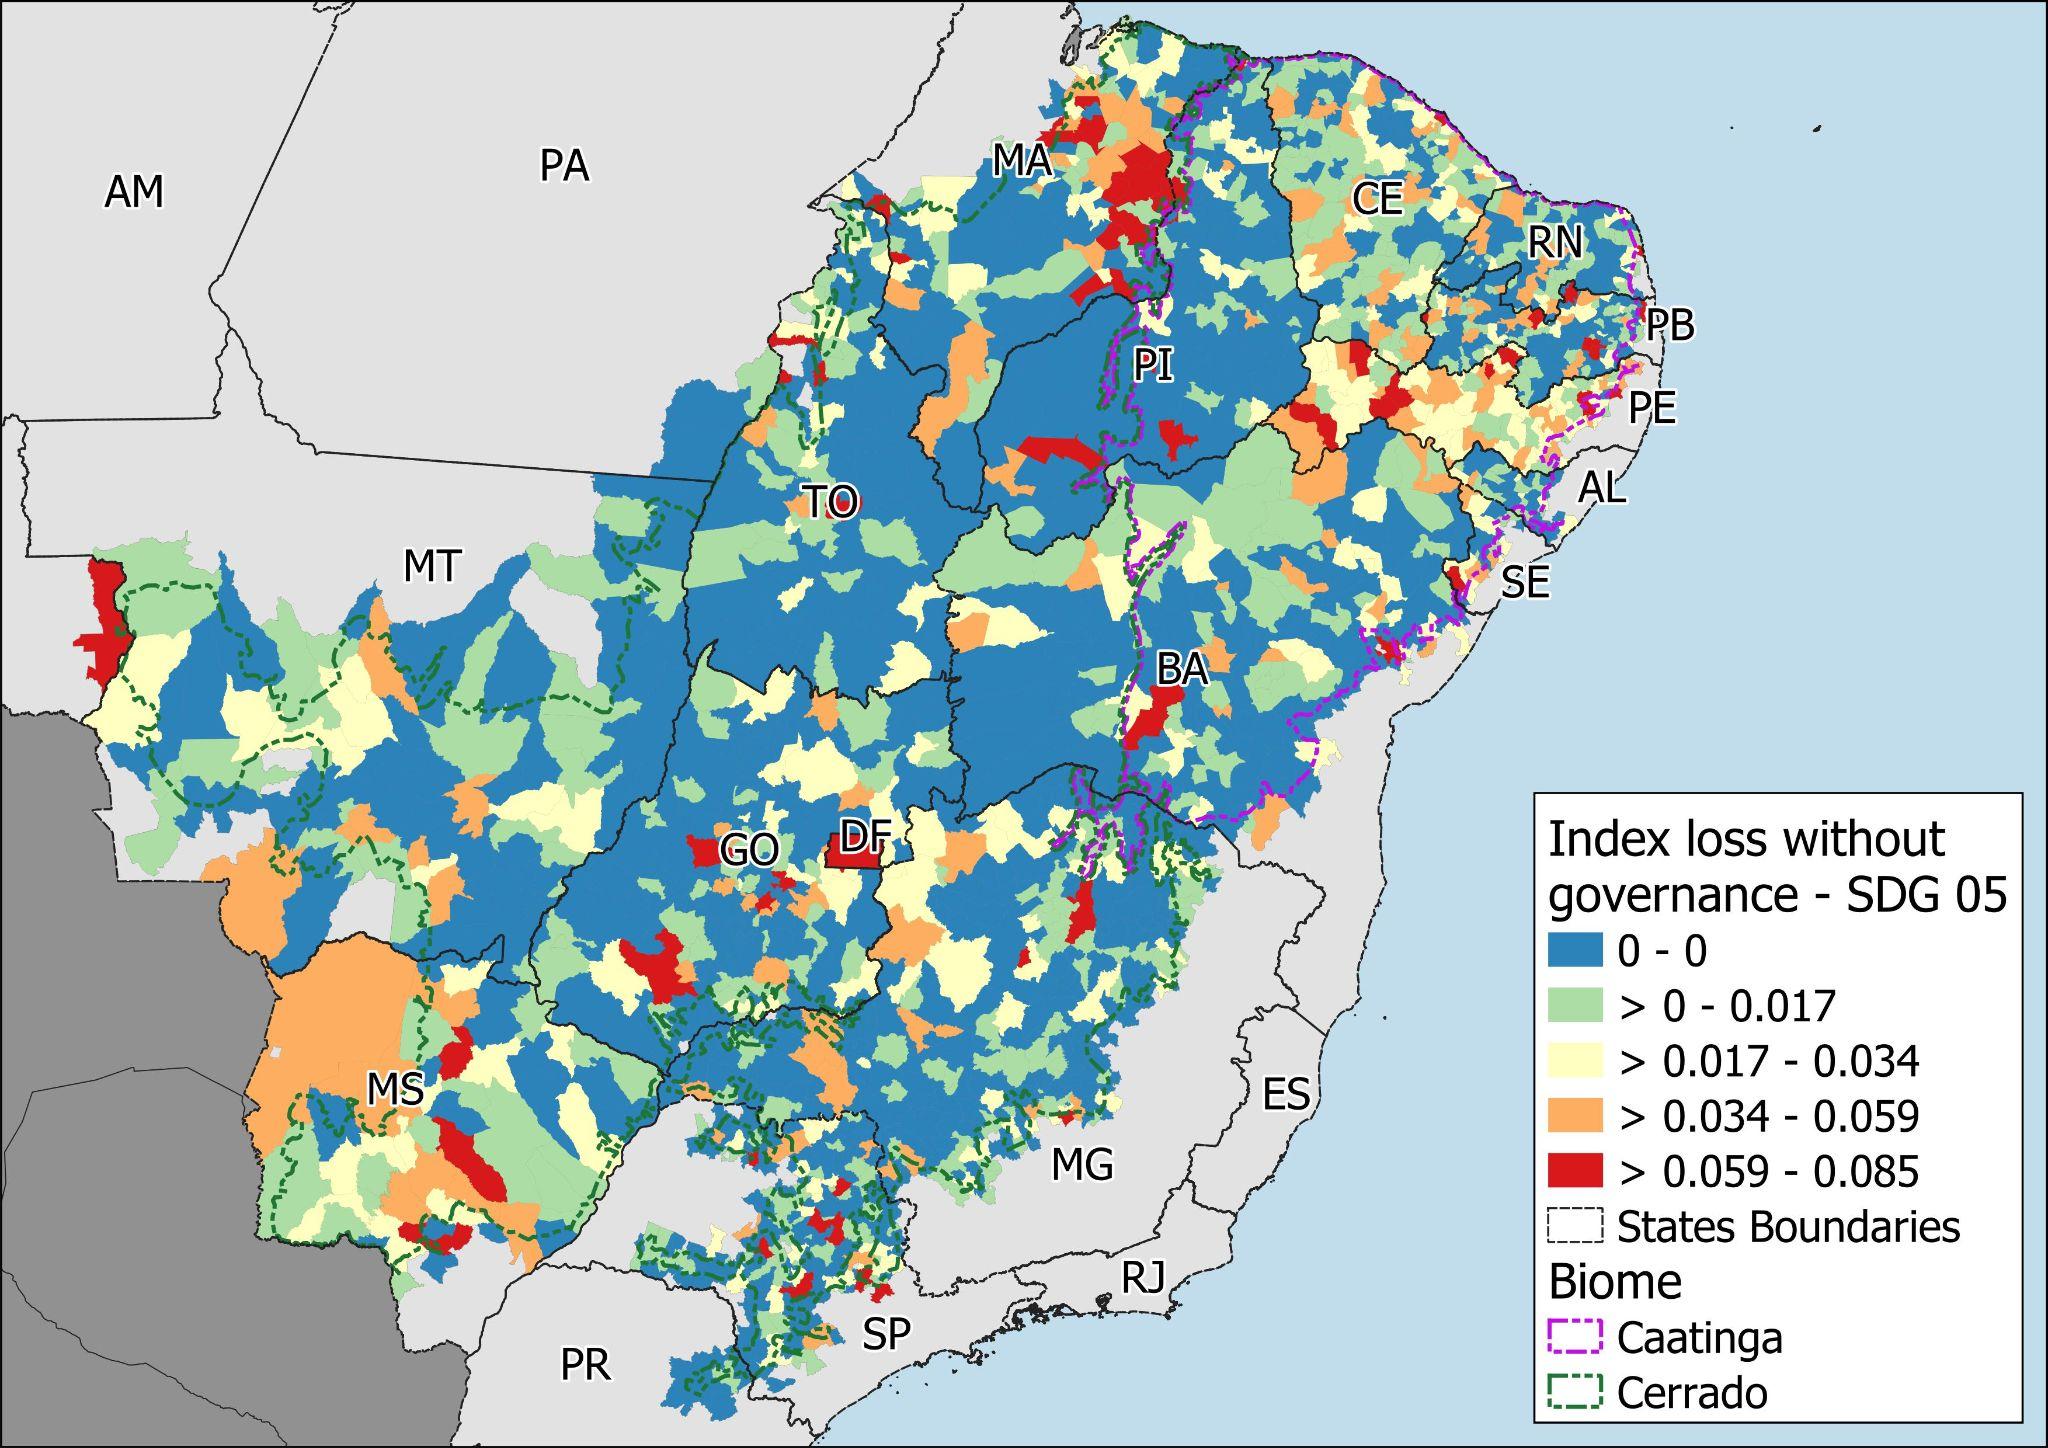


Index loss without governance - SDG 05 and 06


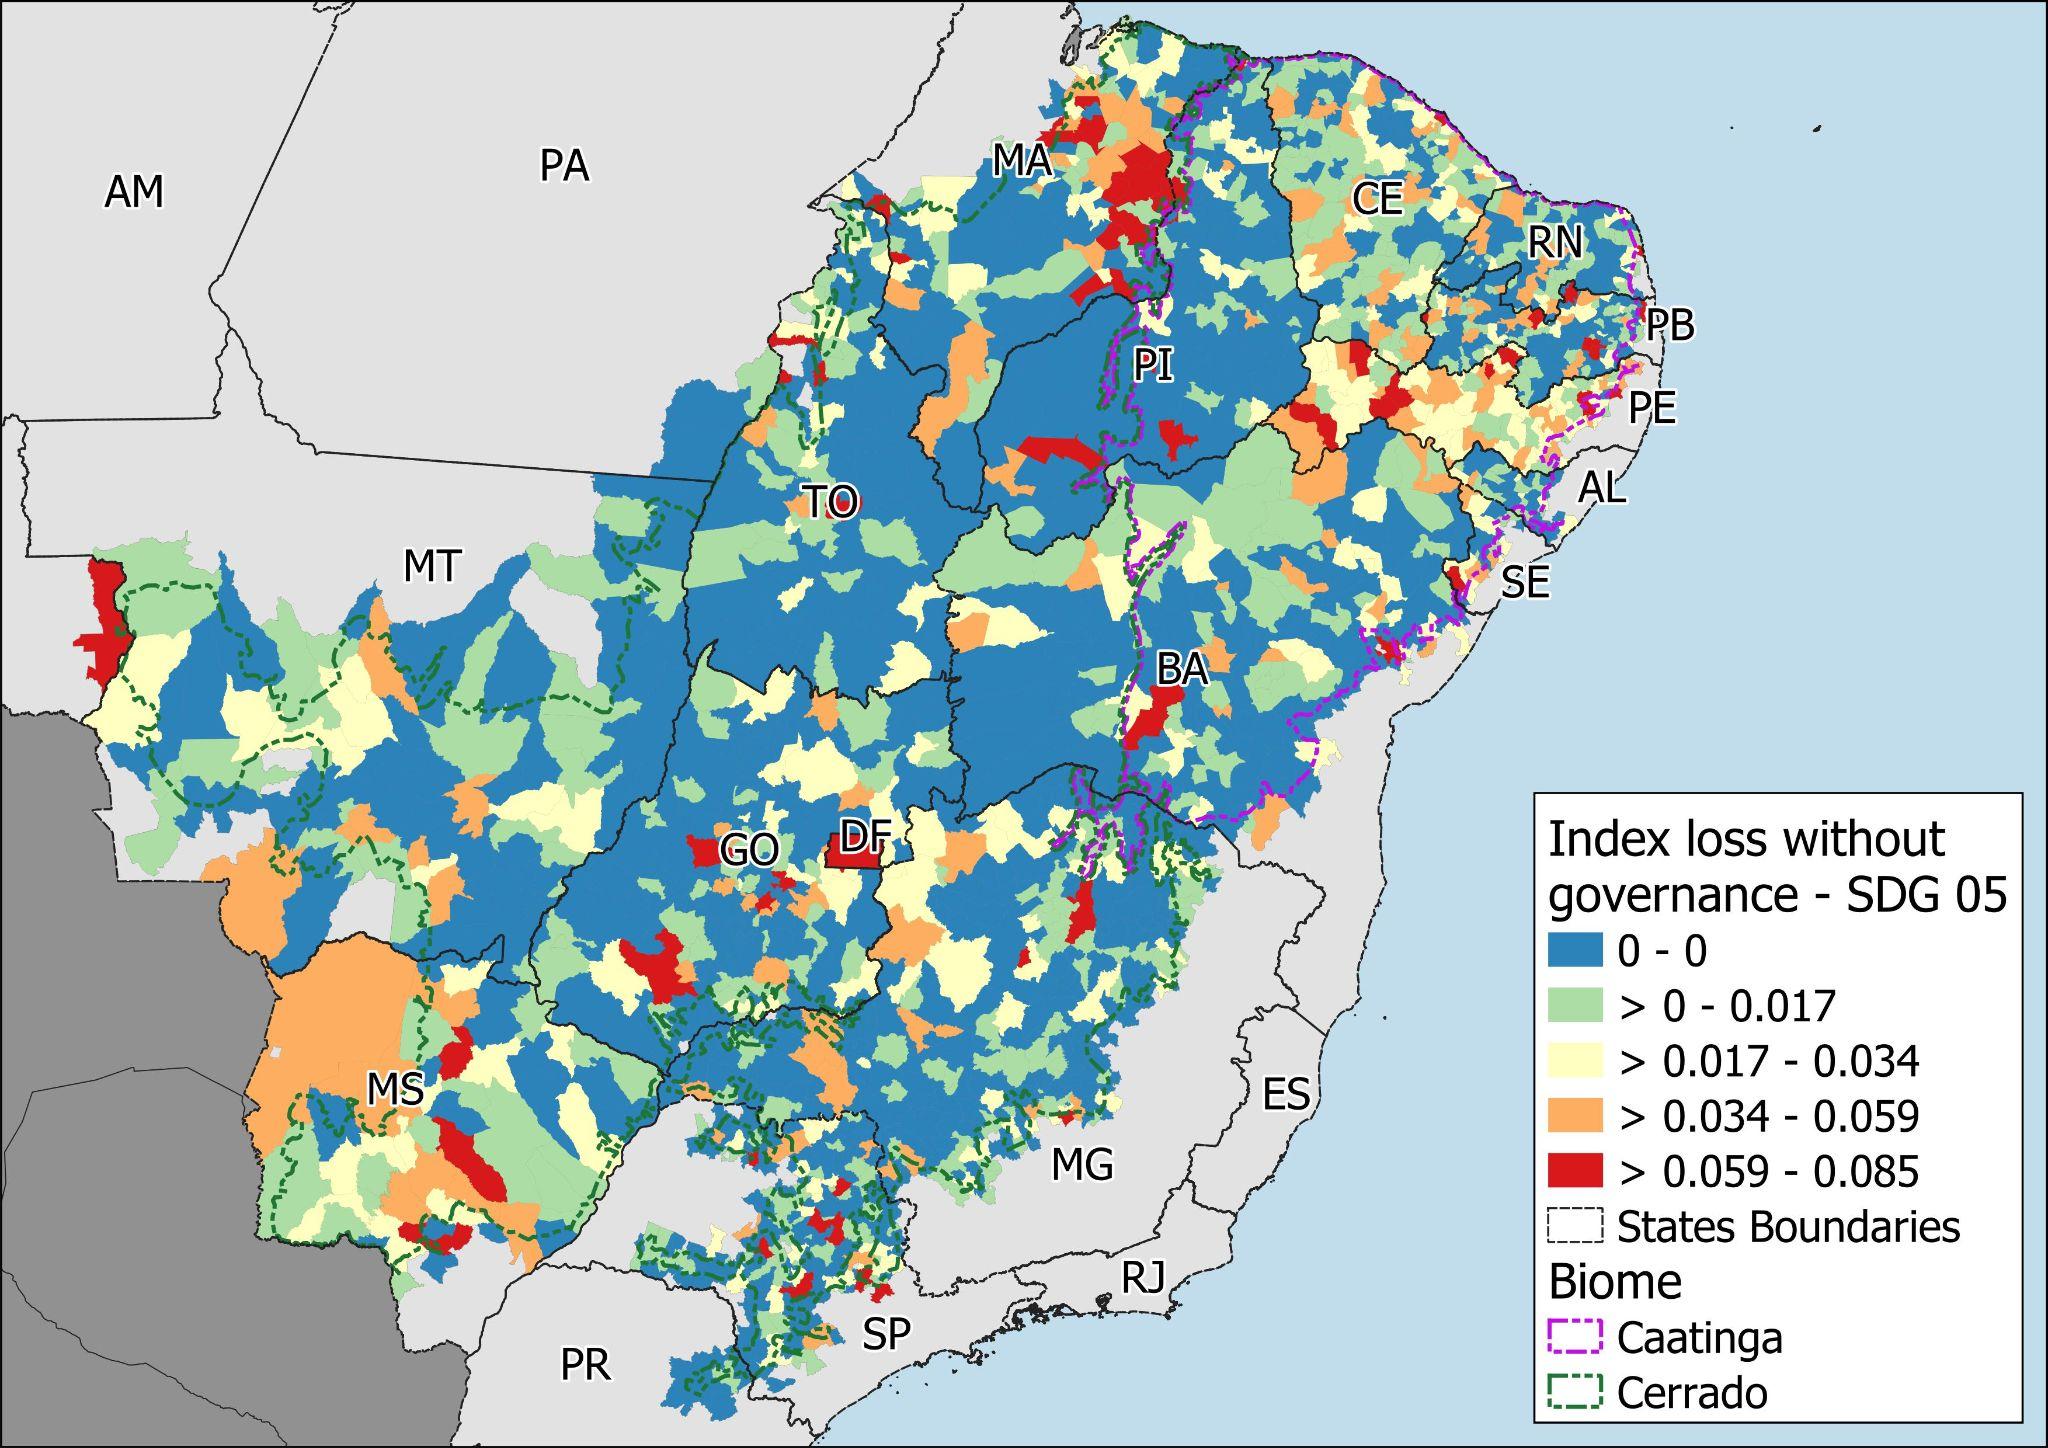

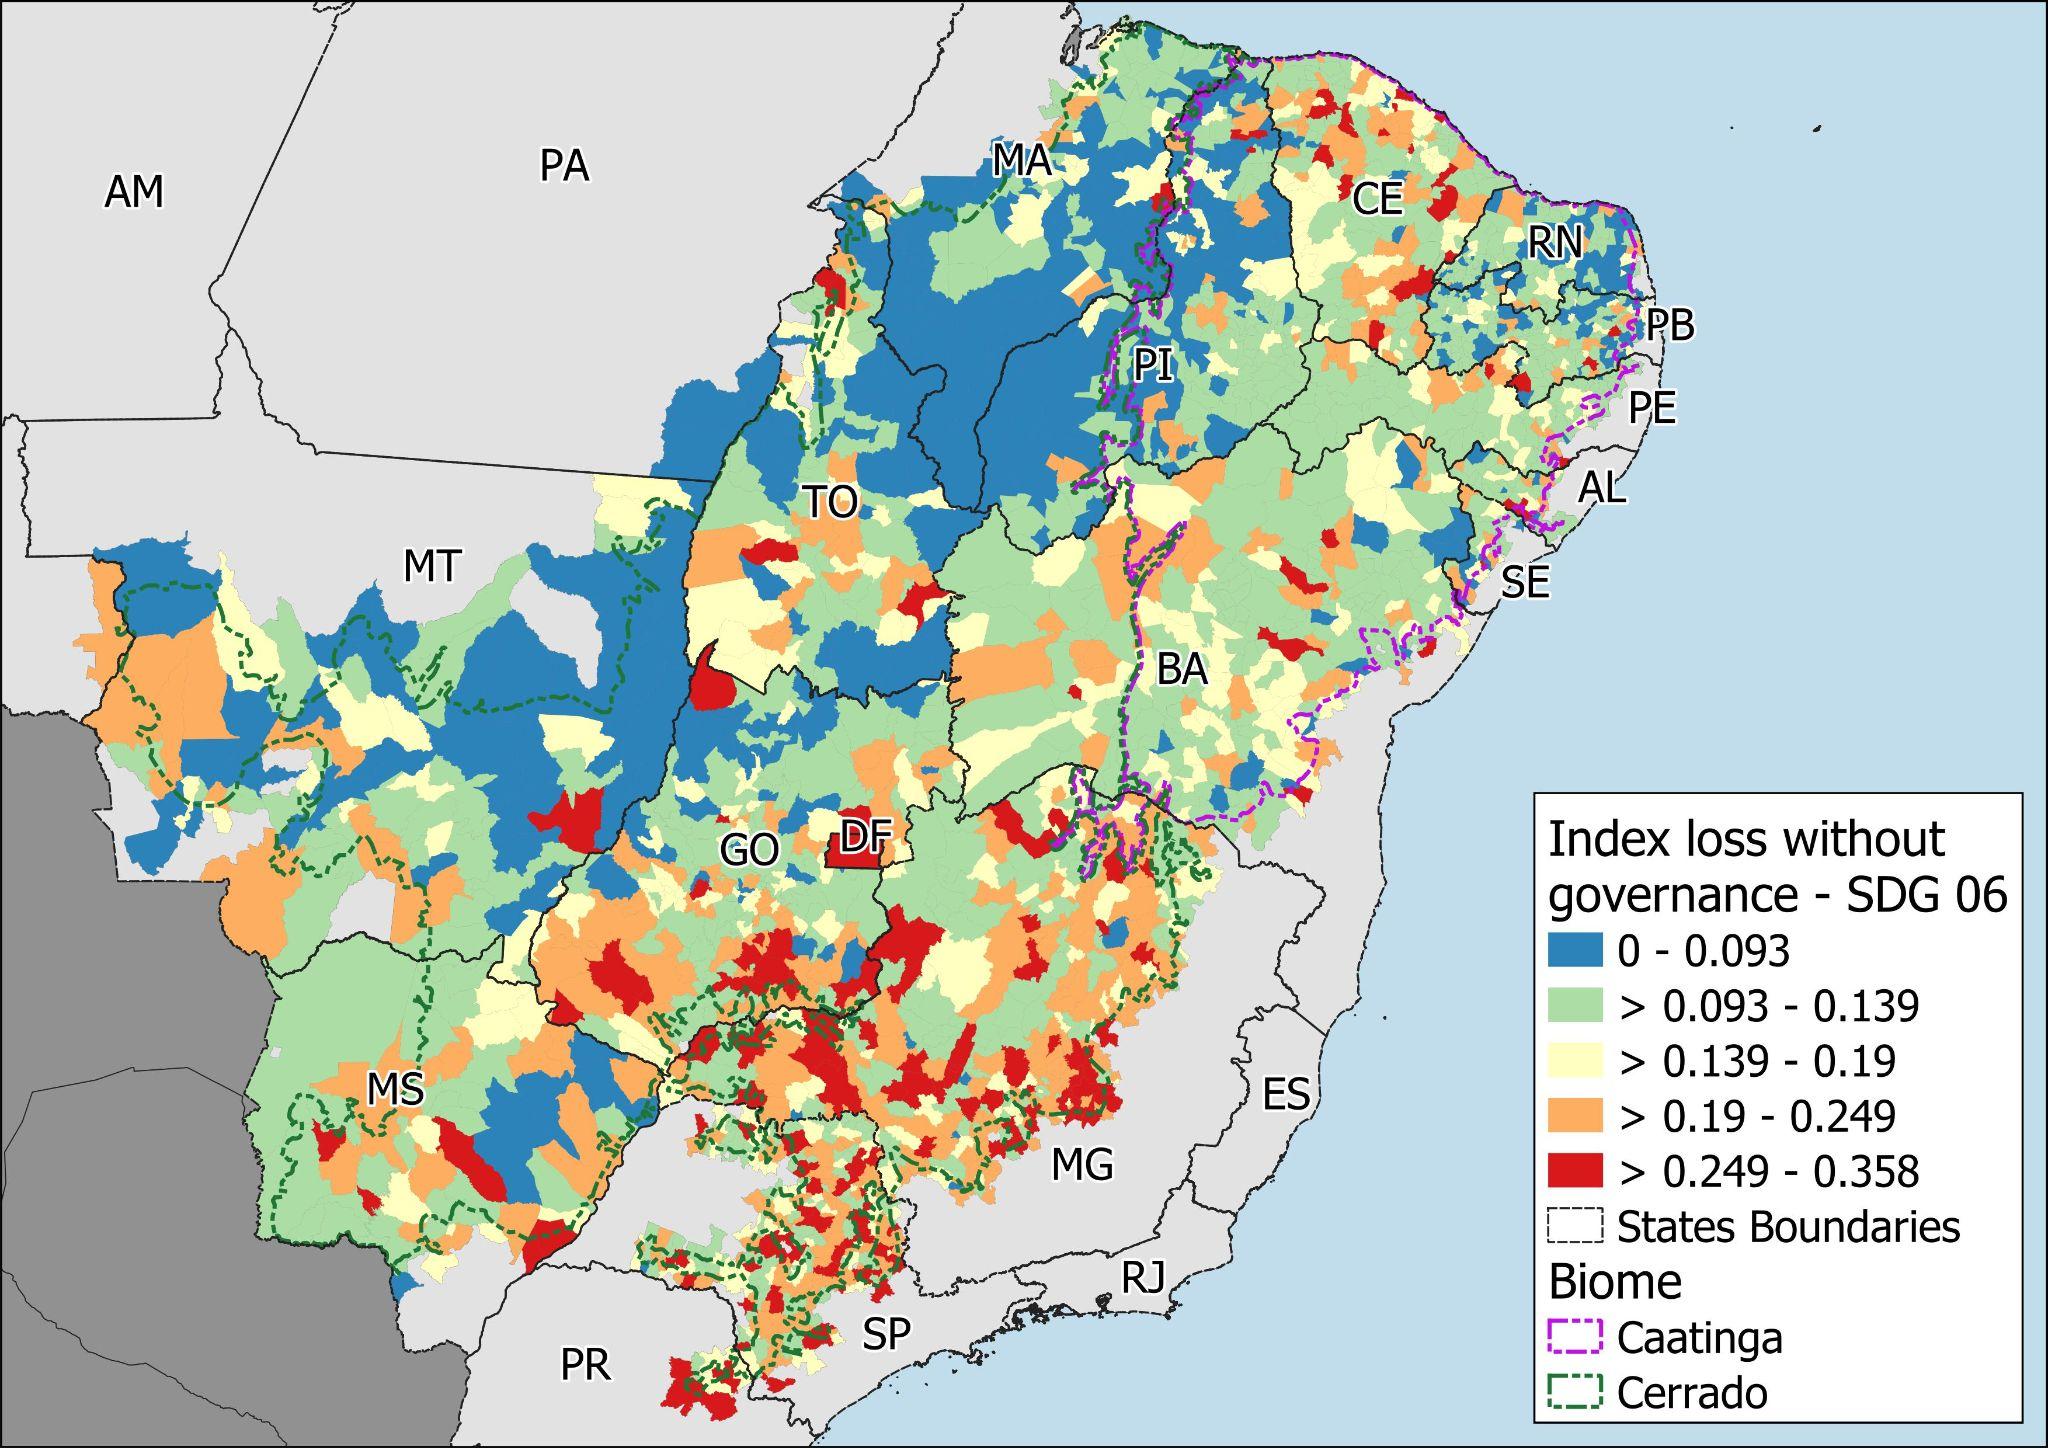


Index loss without governance - SDG 07 and 09


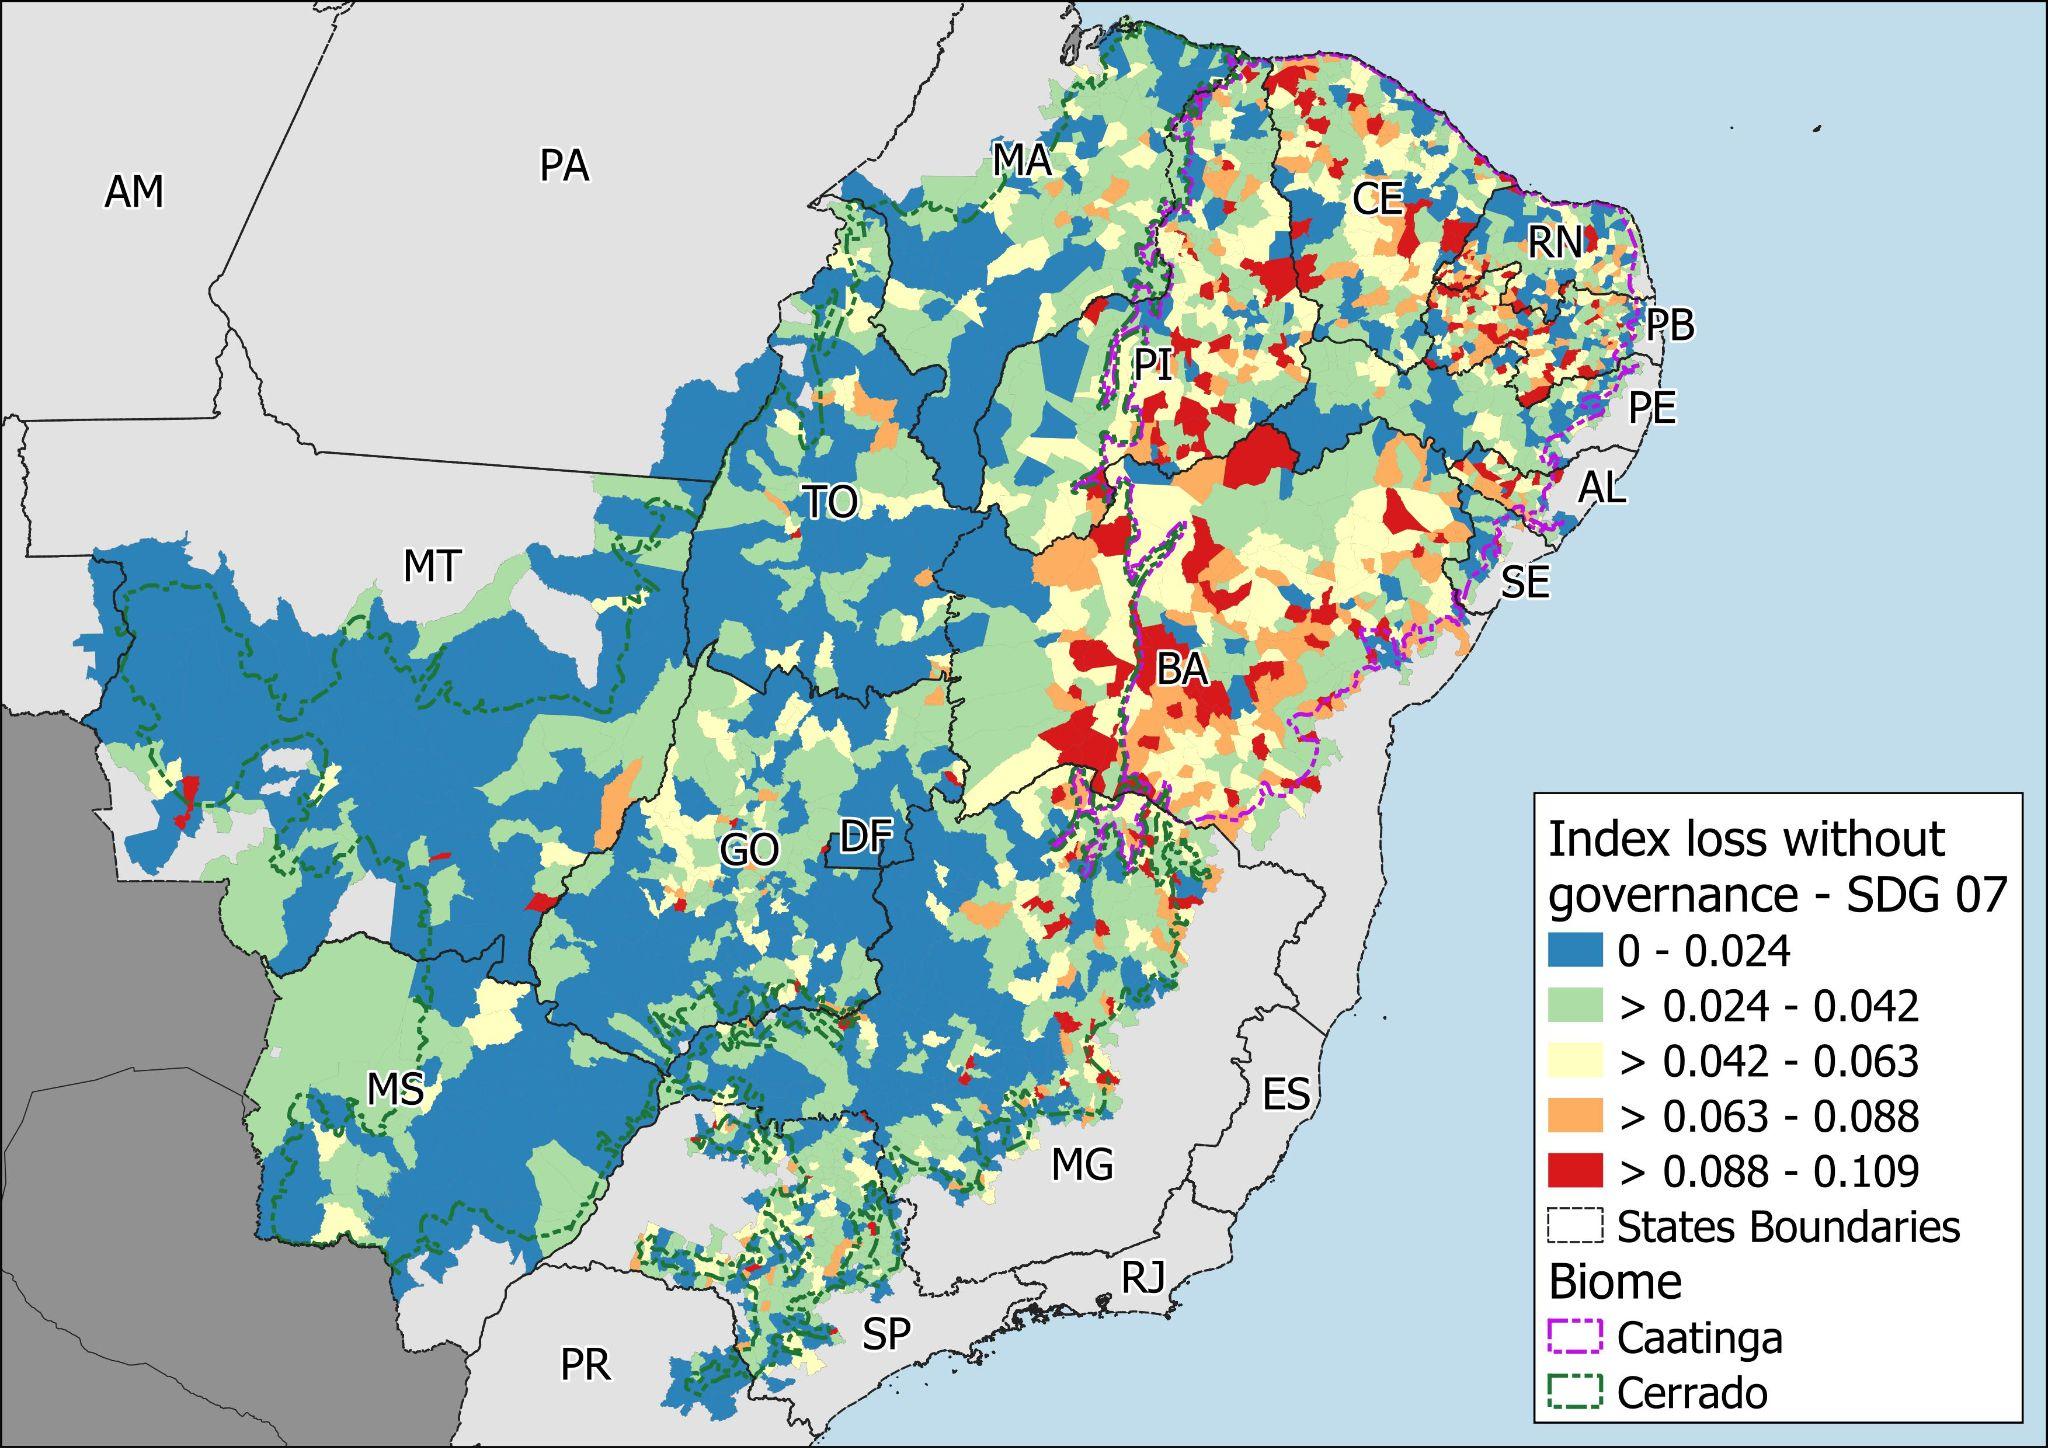

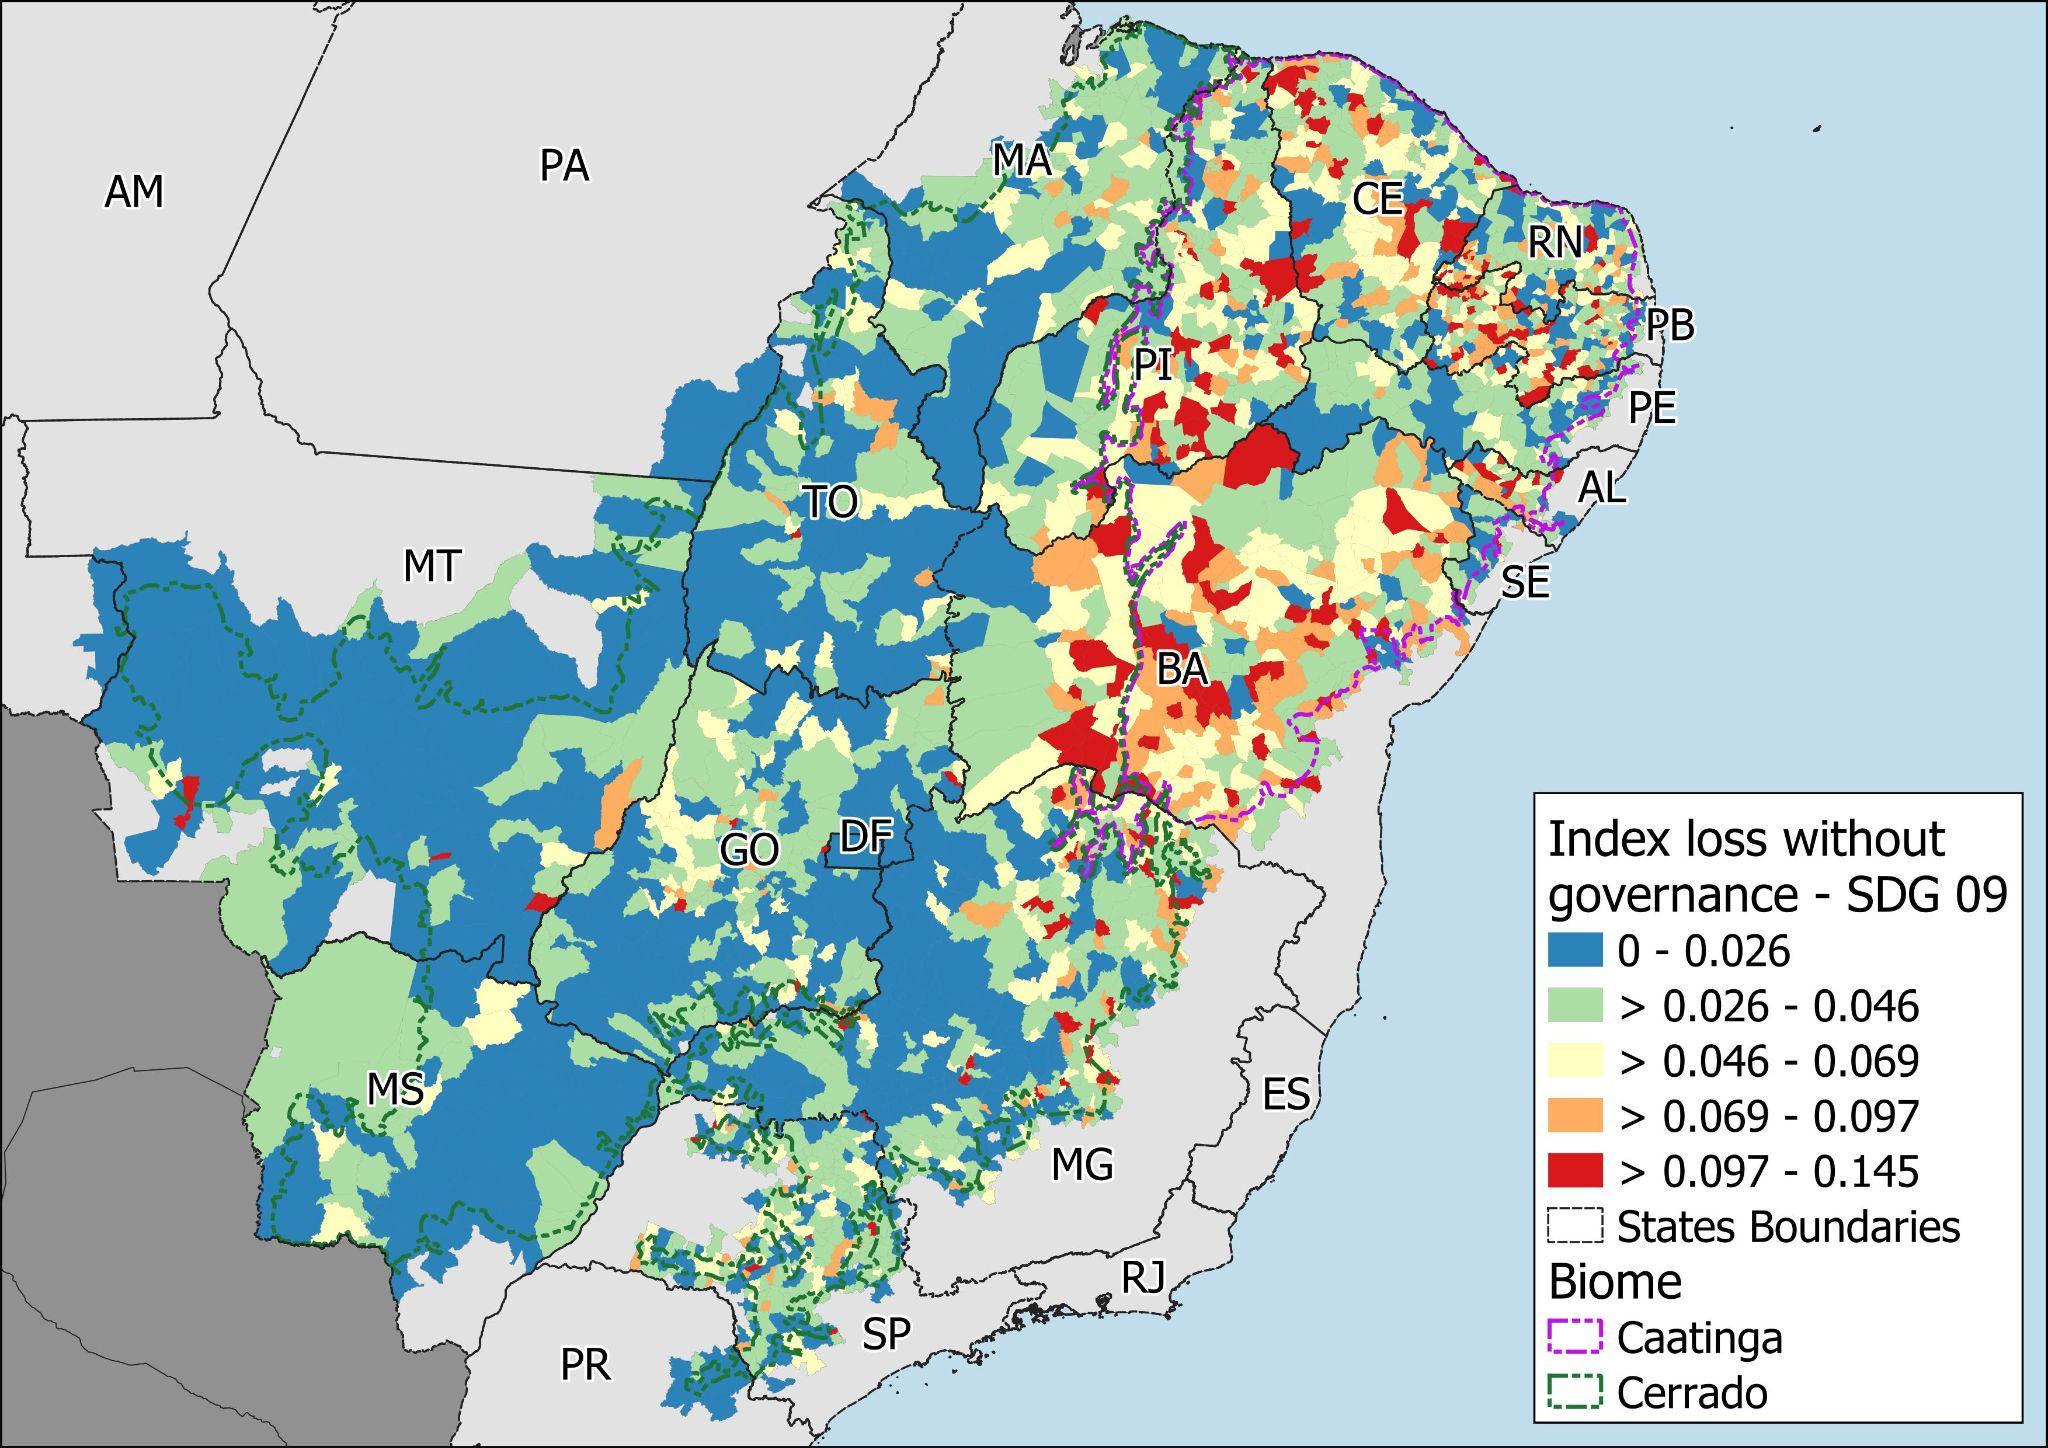


Index loss without governance - SDG 10 and 11


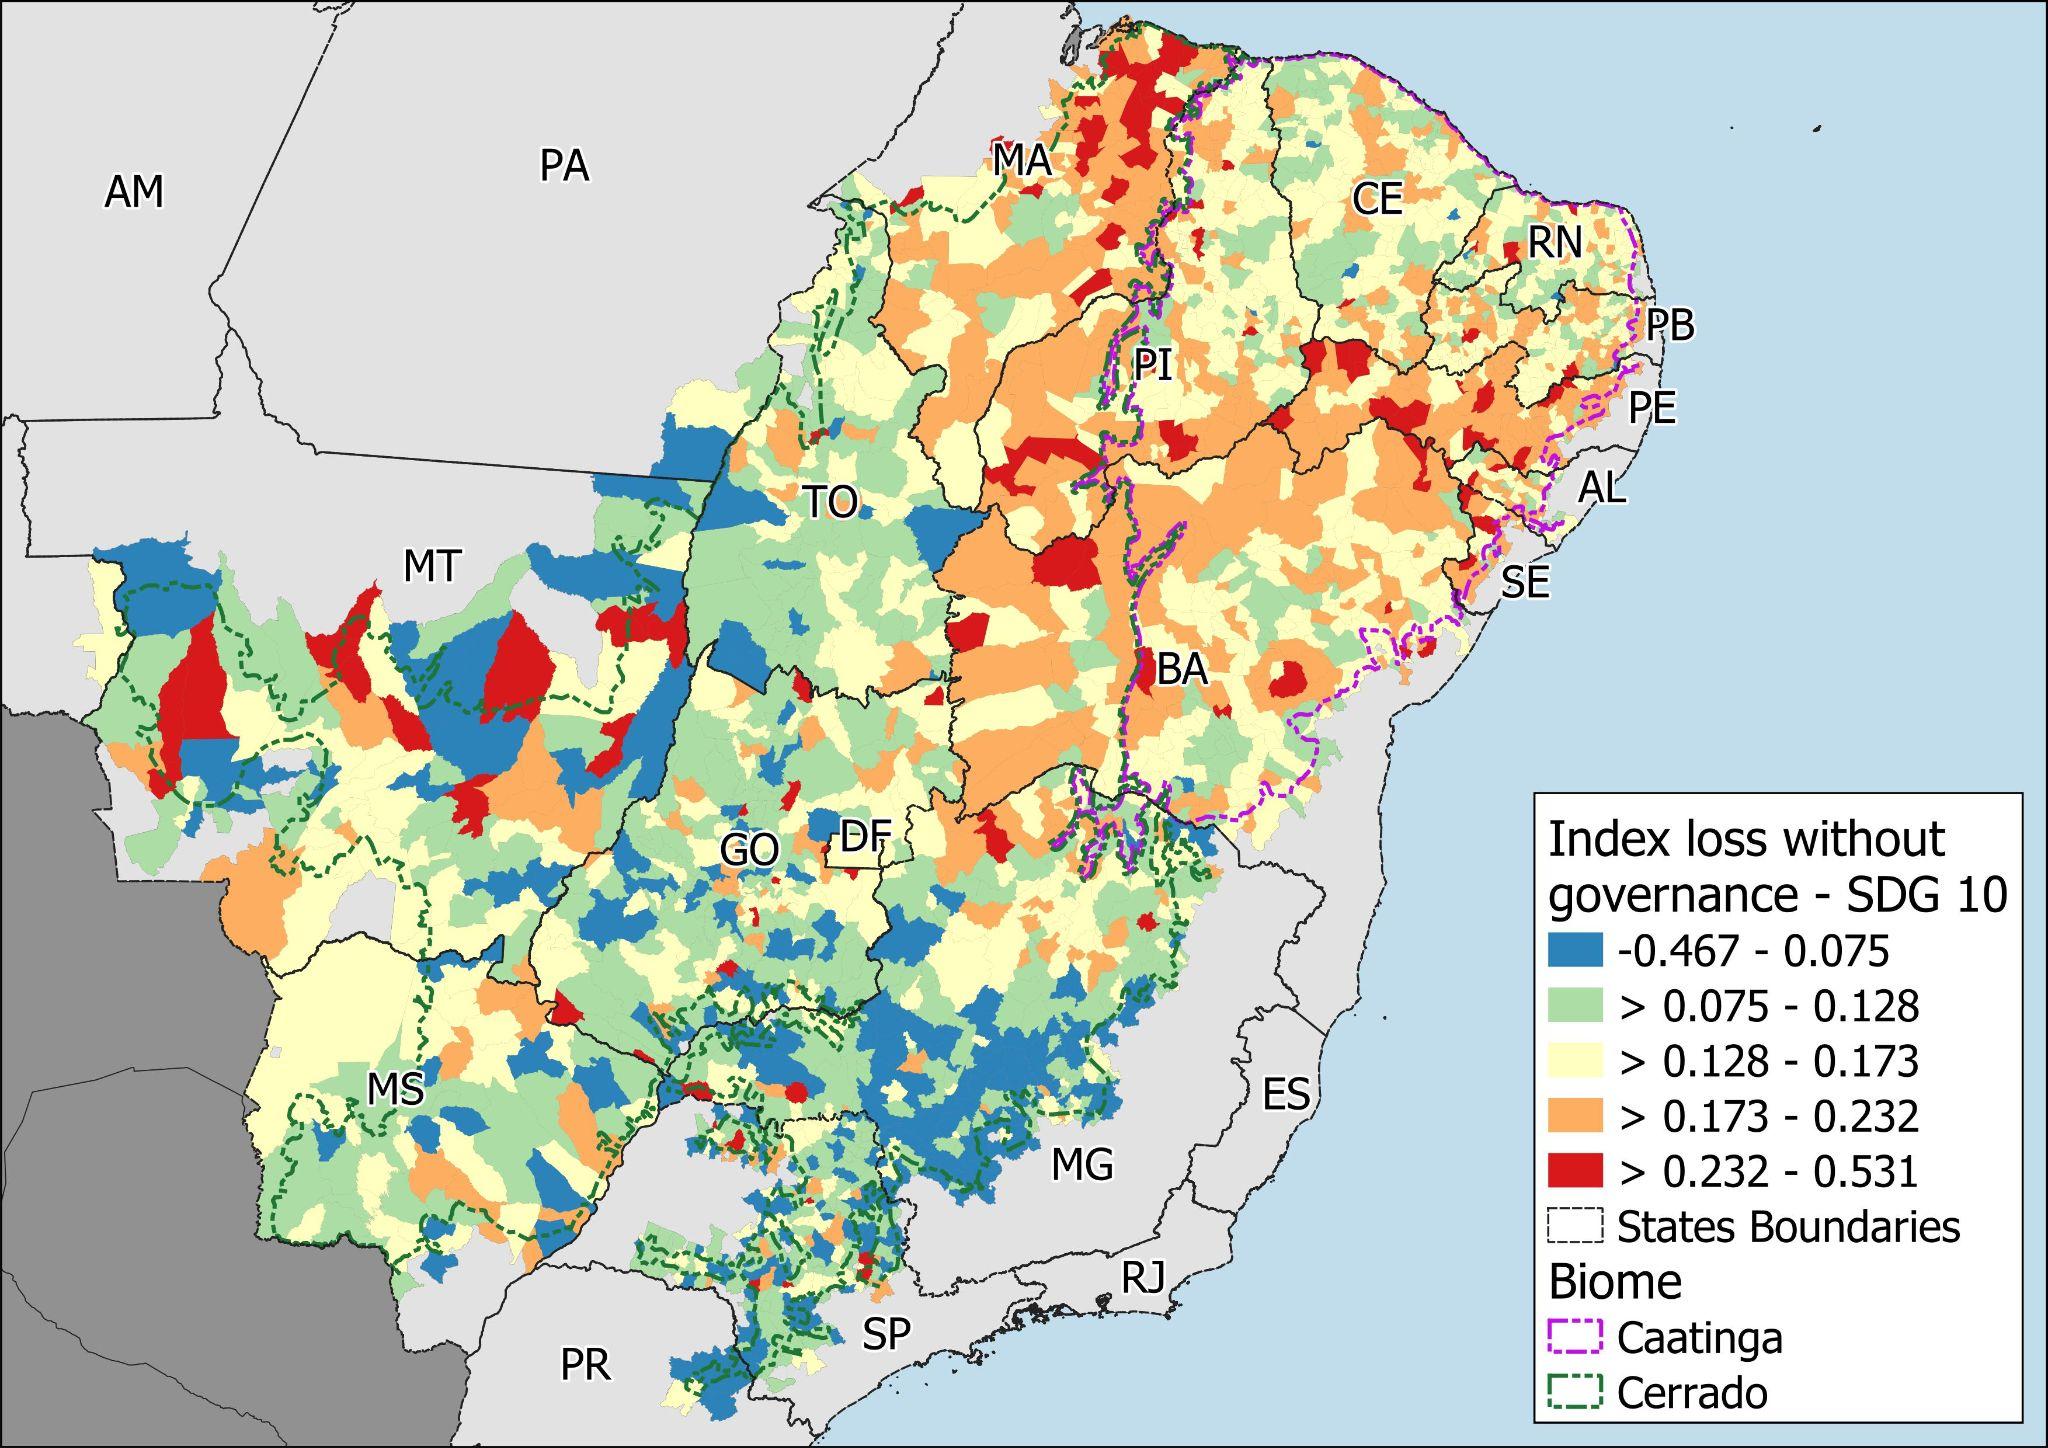

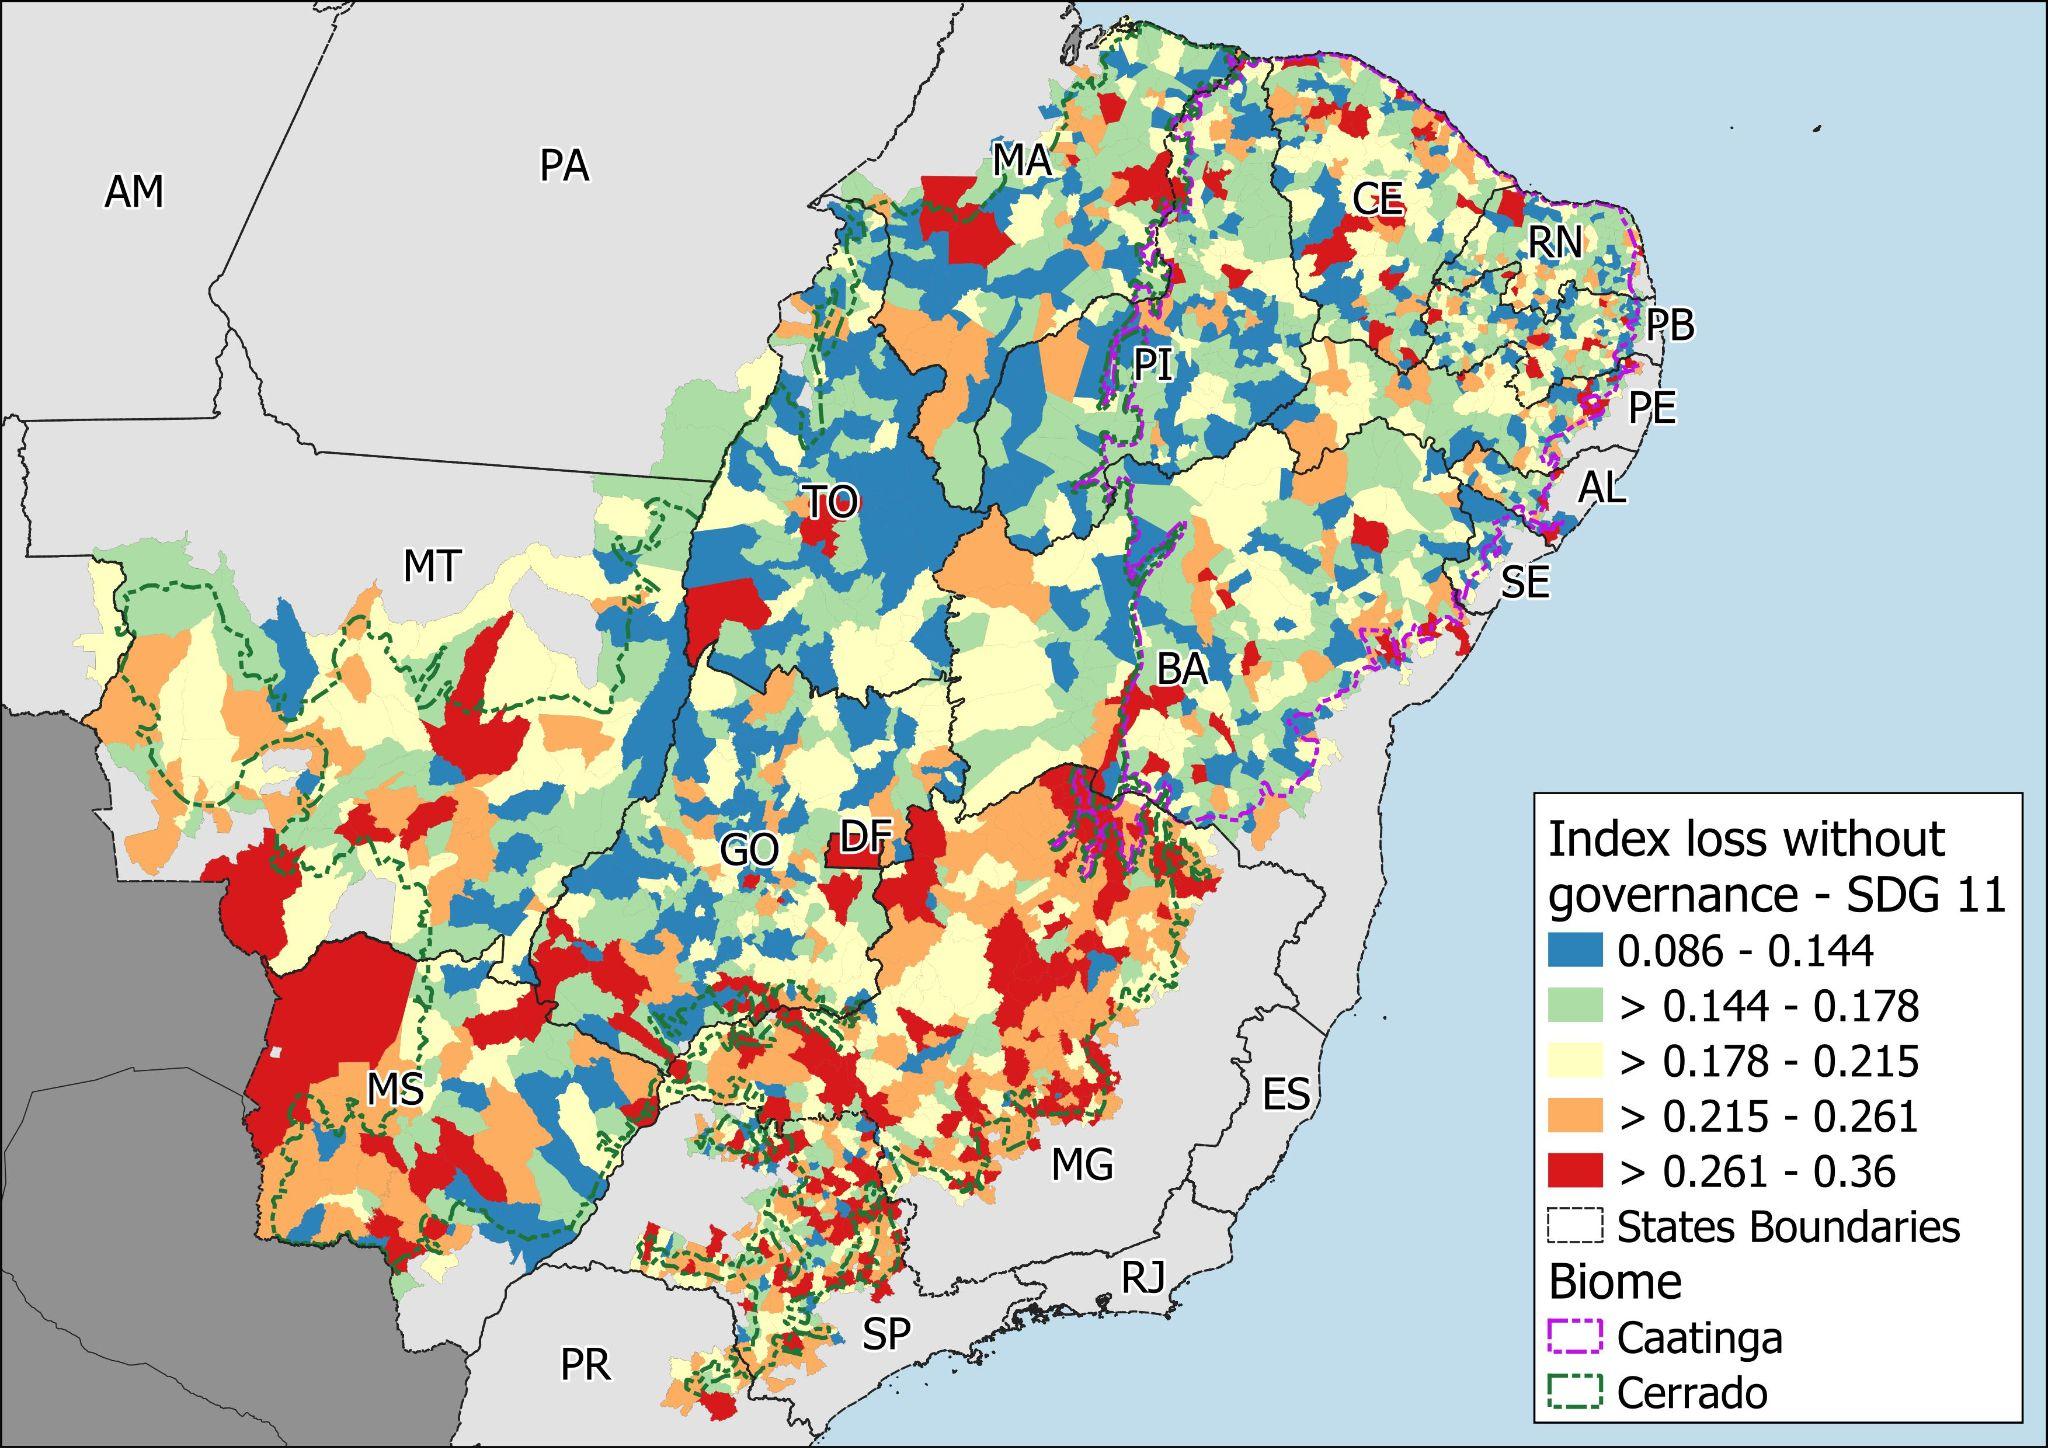


Index loss without governance - SDG 12 and 13


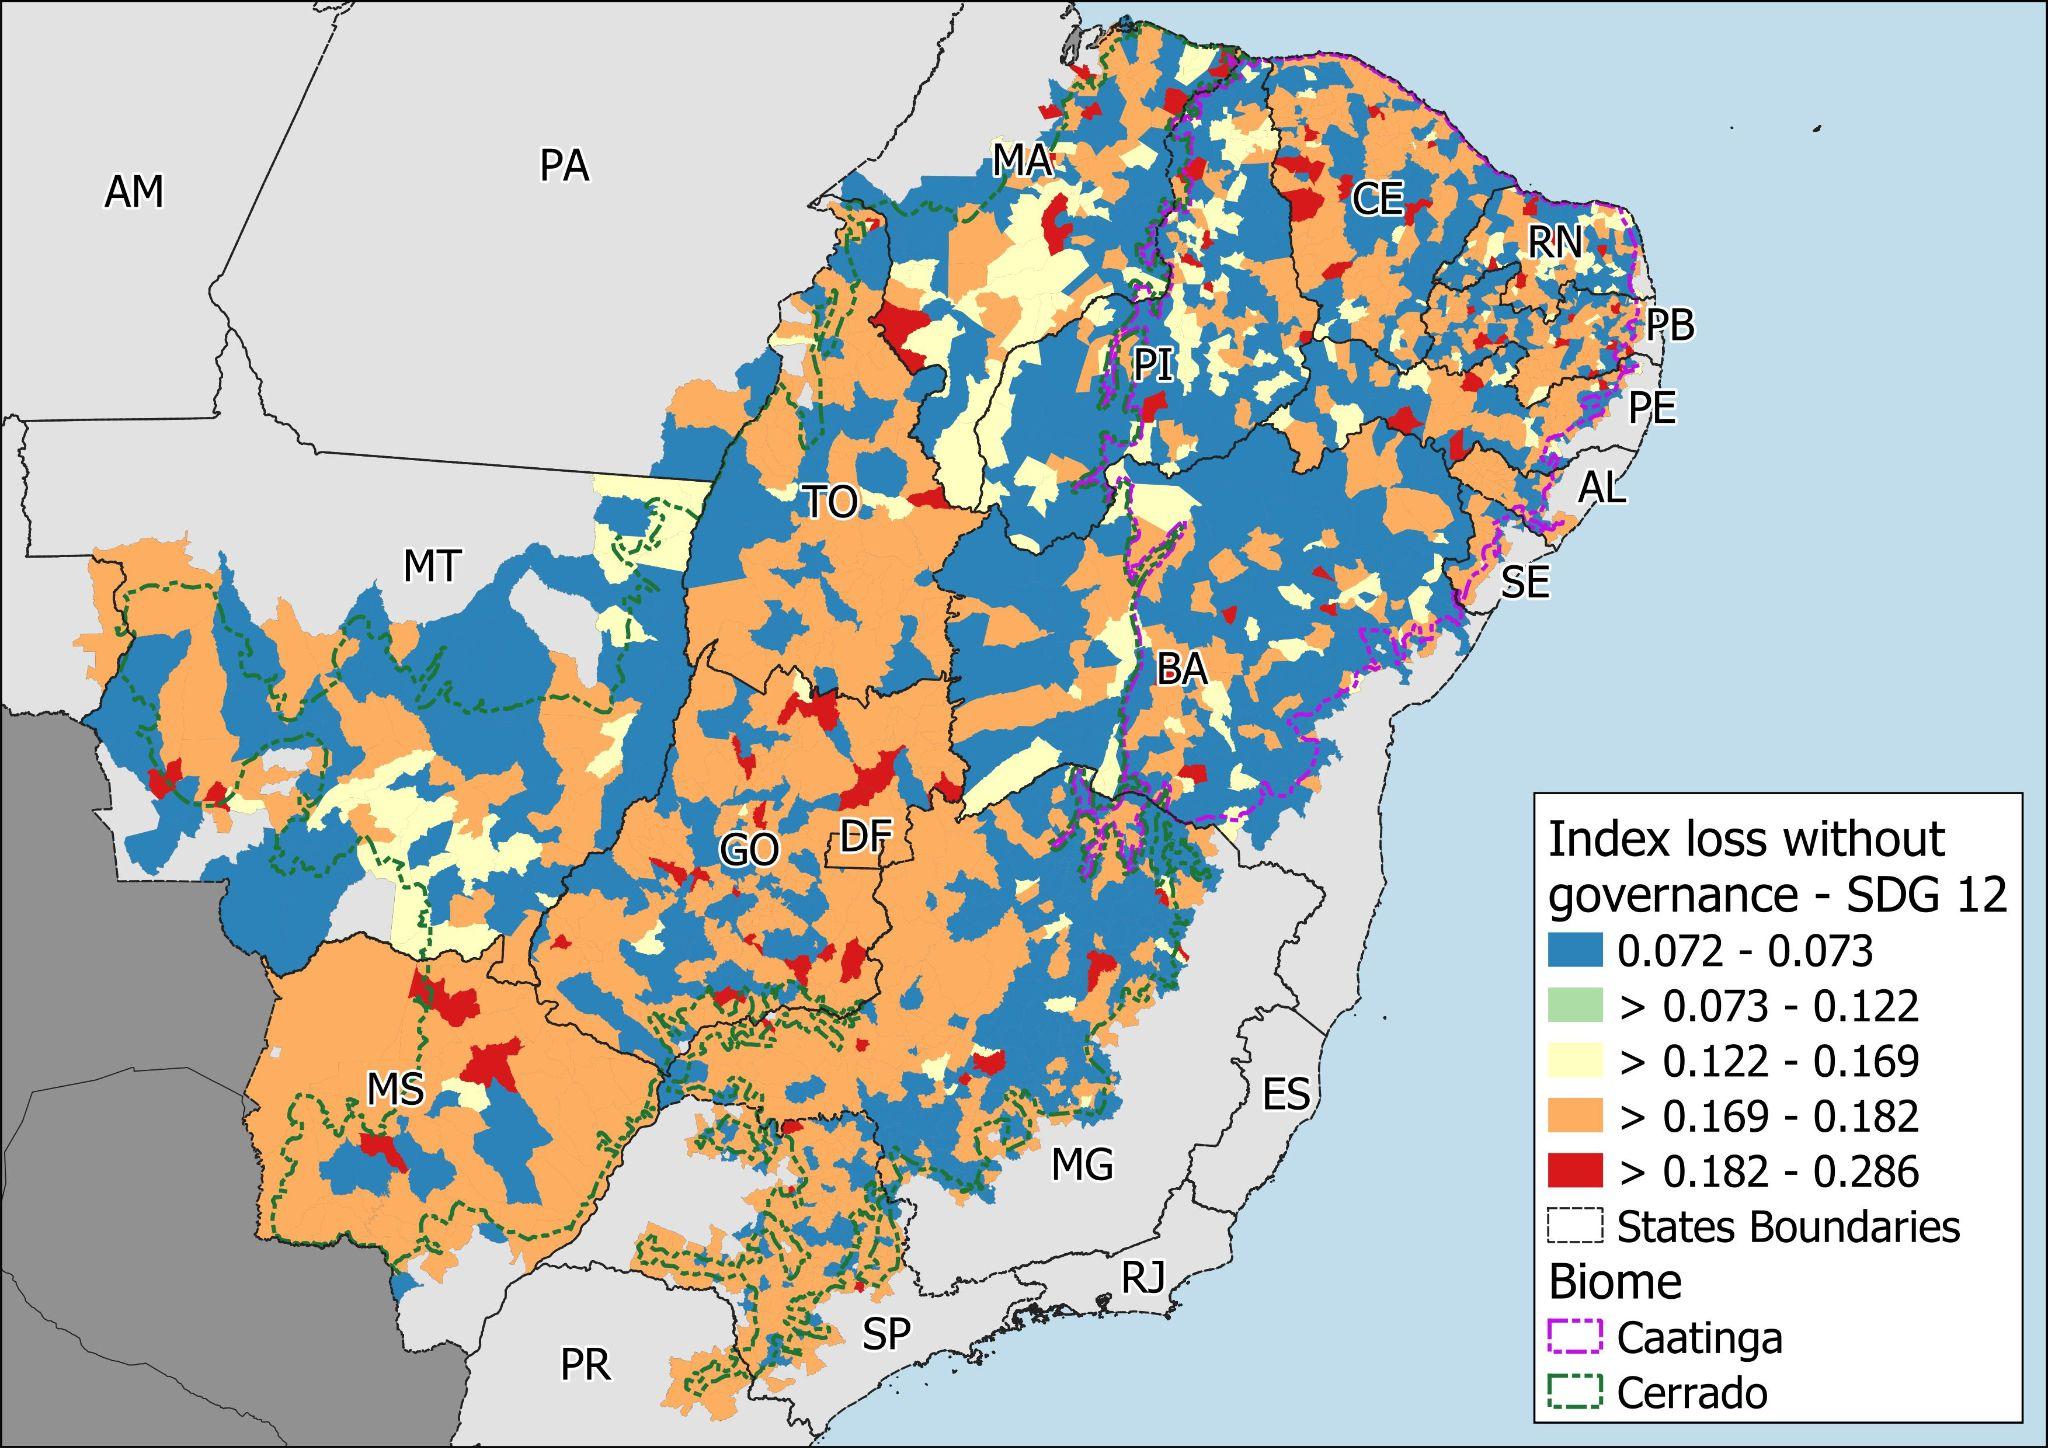

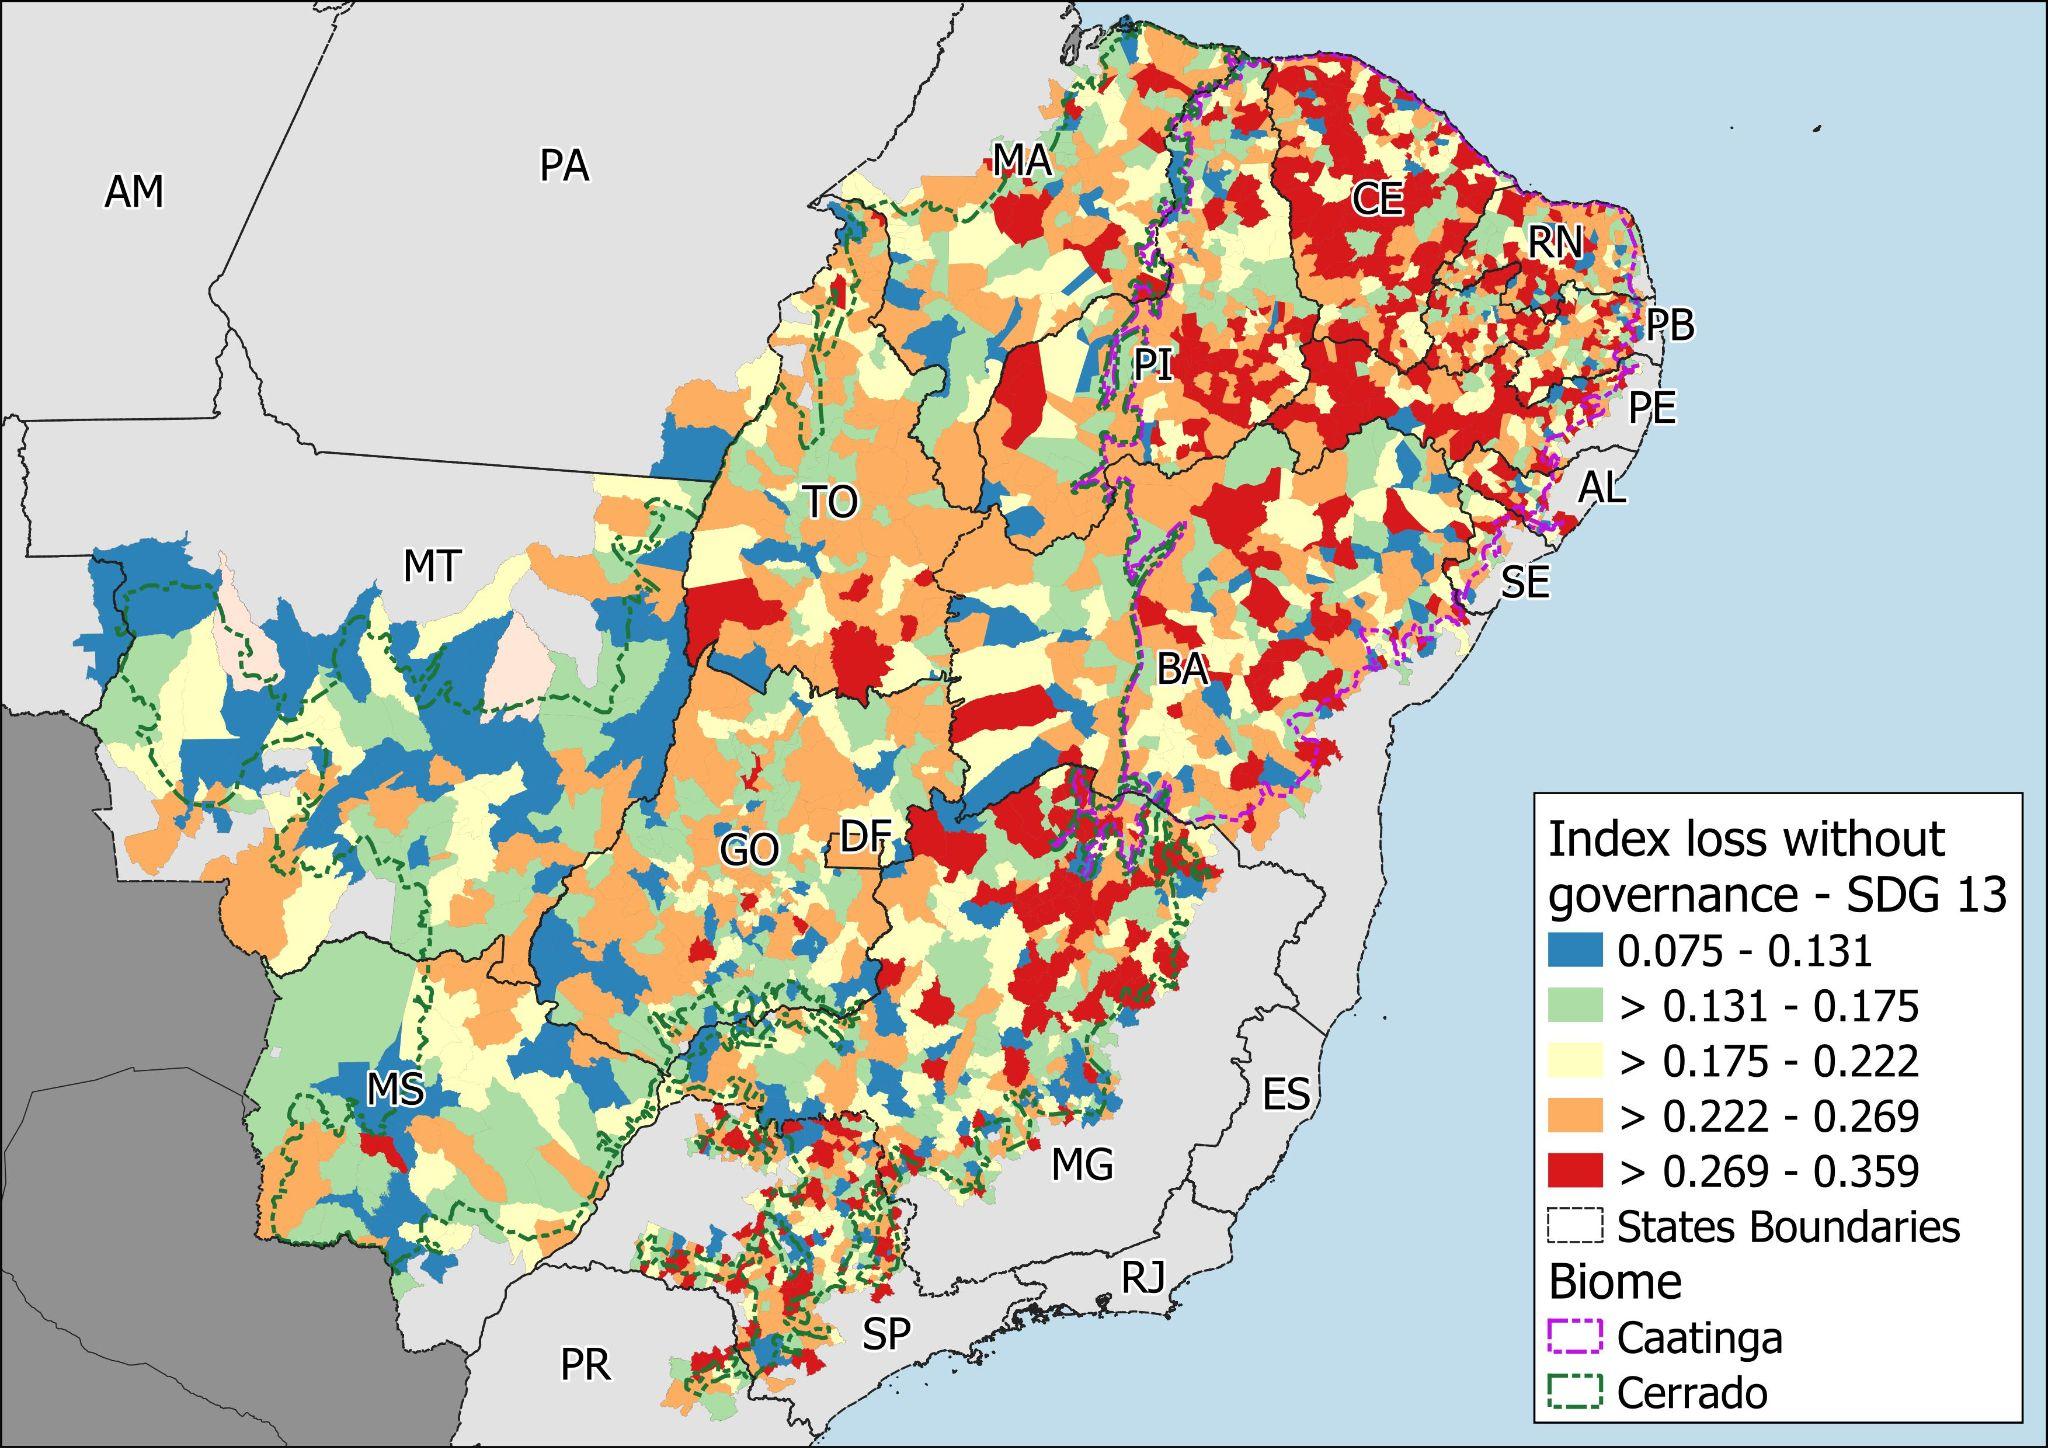


Index loss without governance - SDG 15 and 16


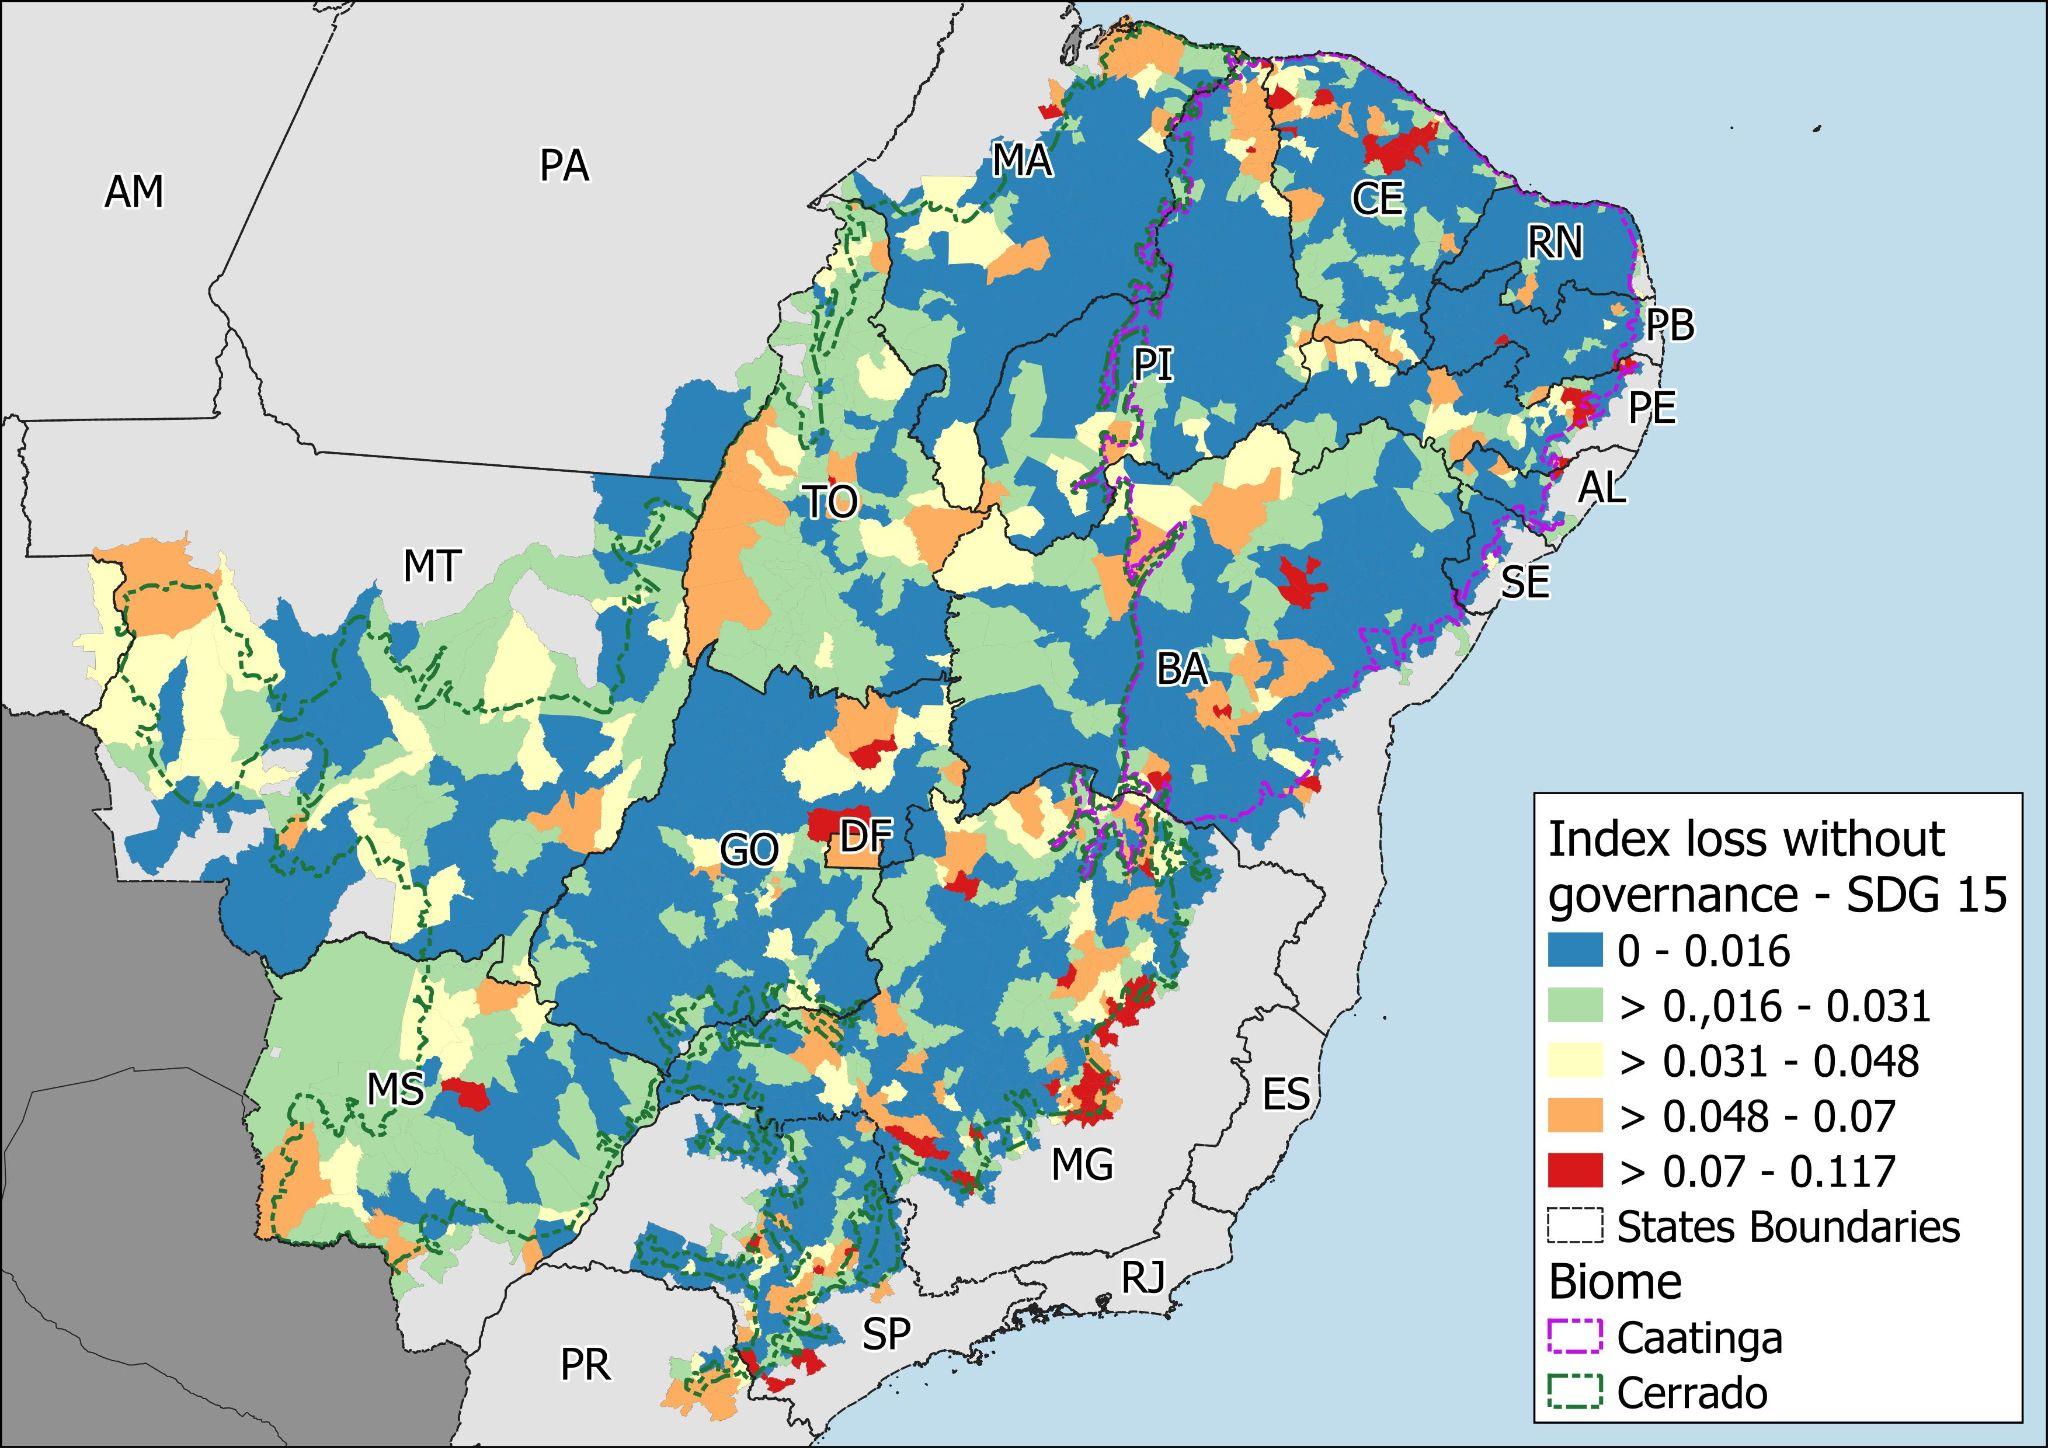

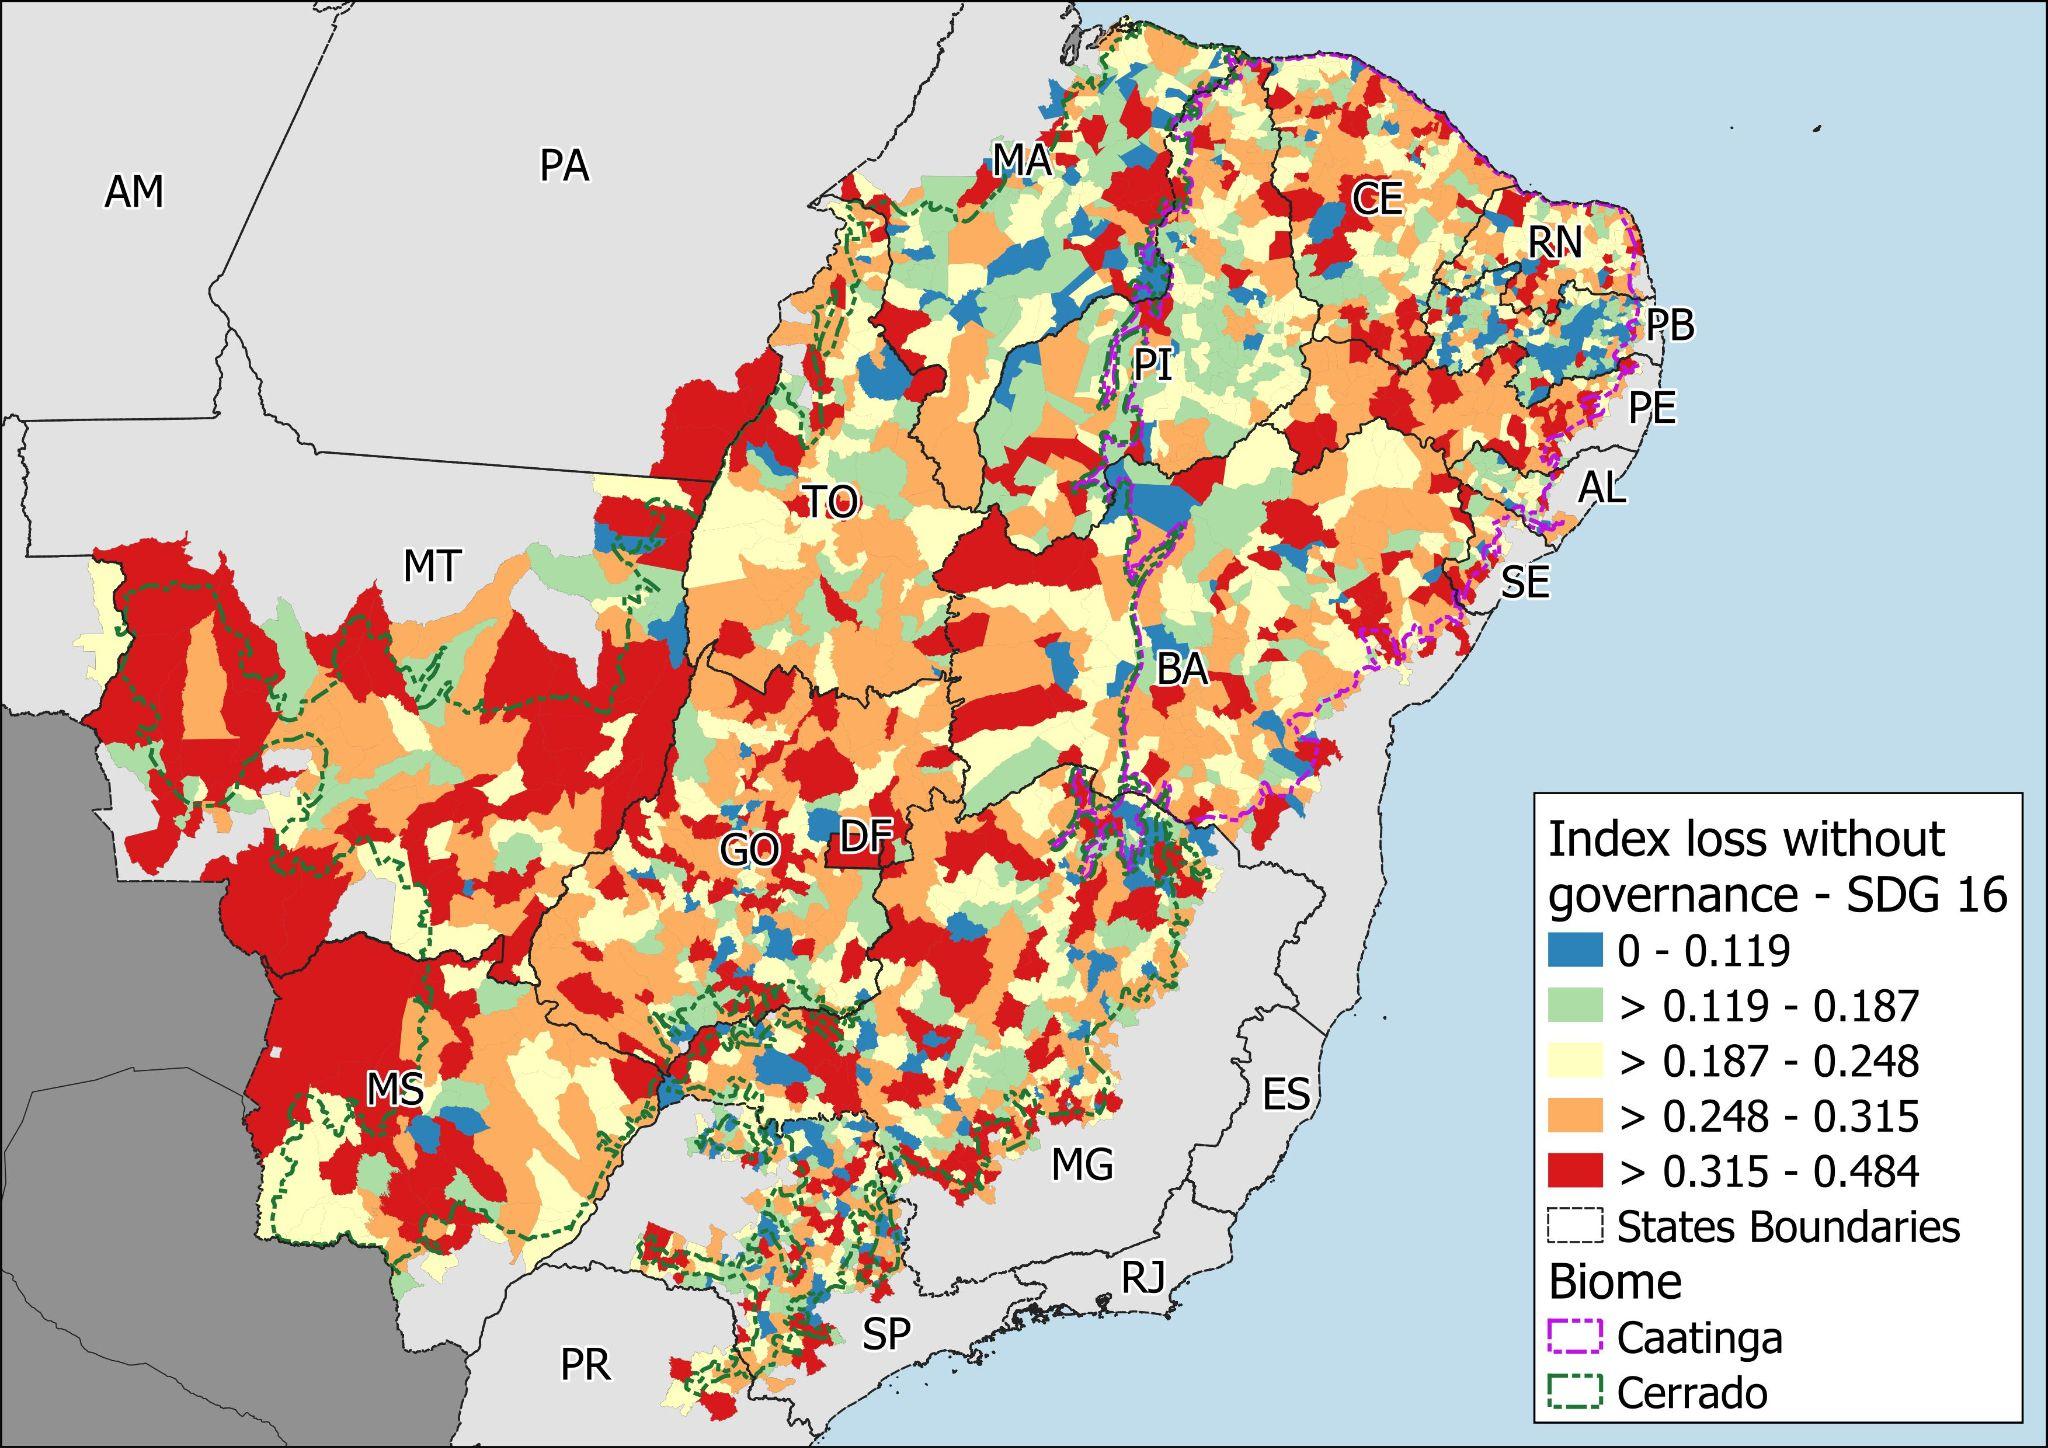


Index loss without governance - SDG 17


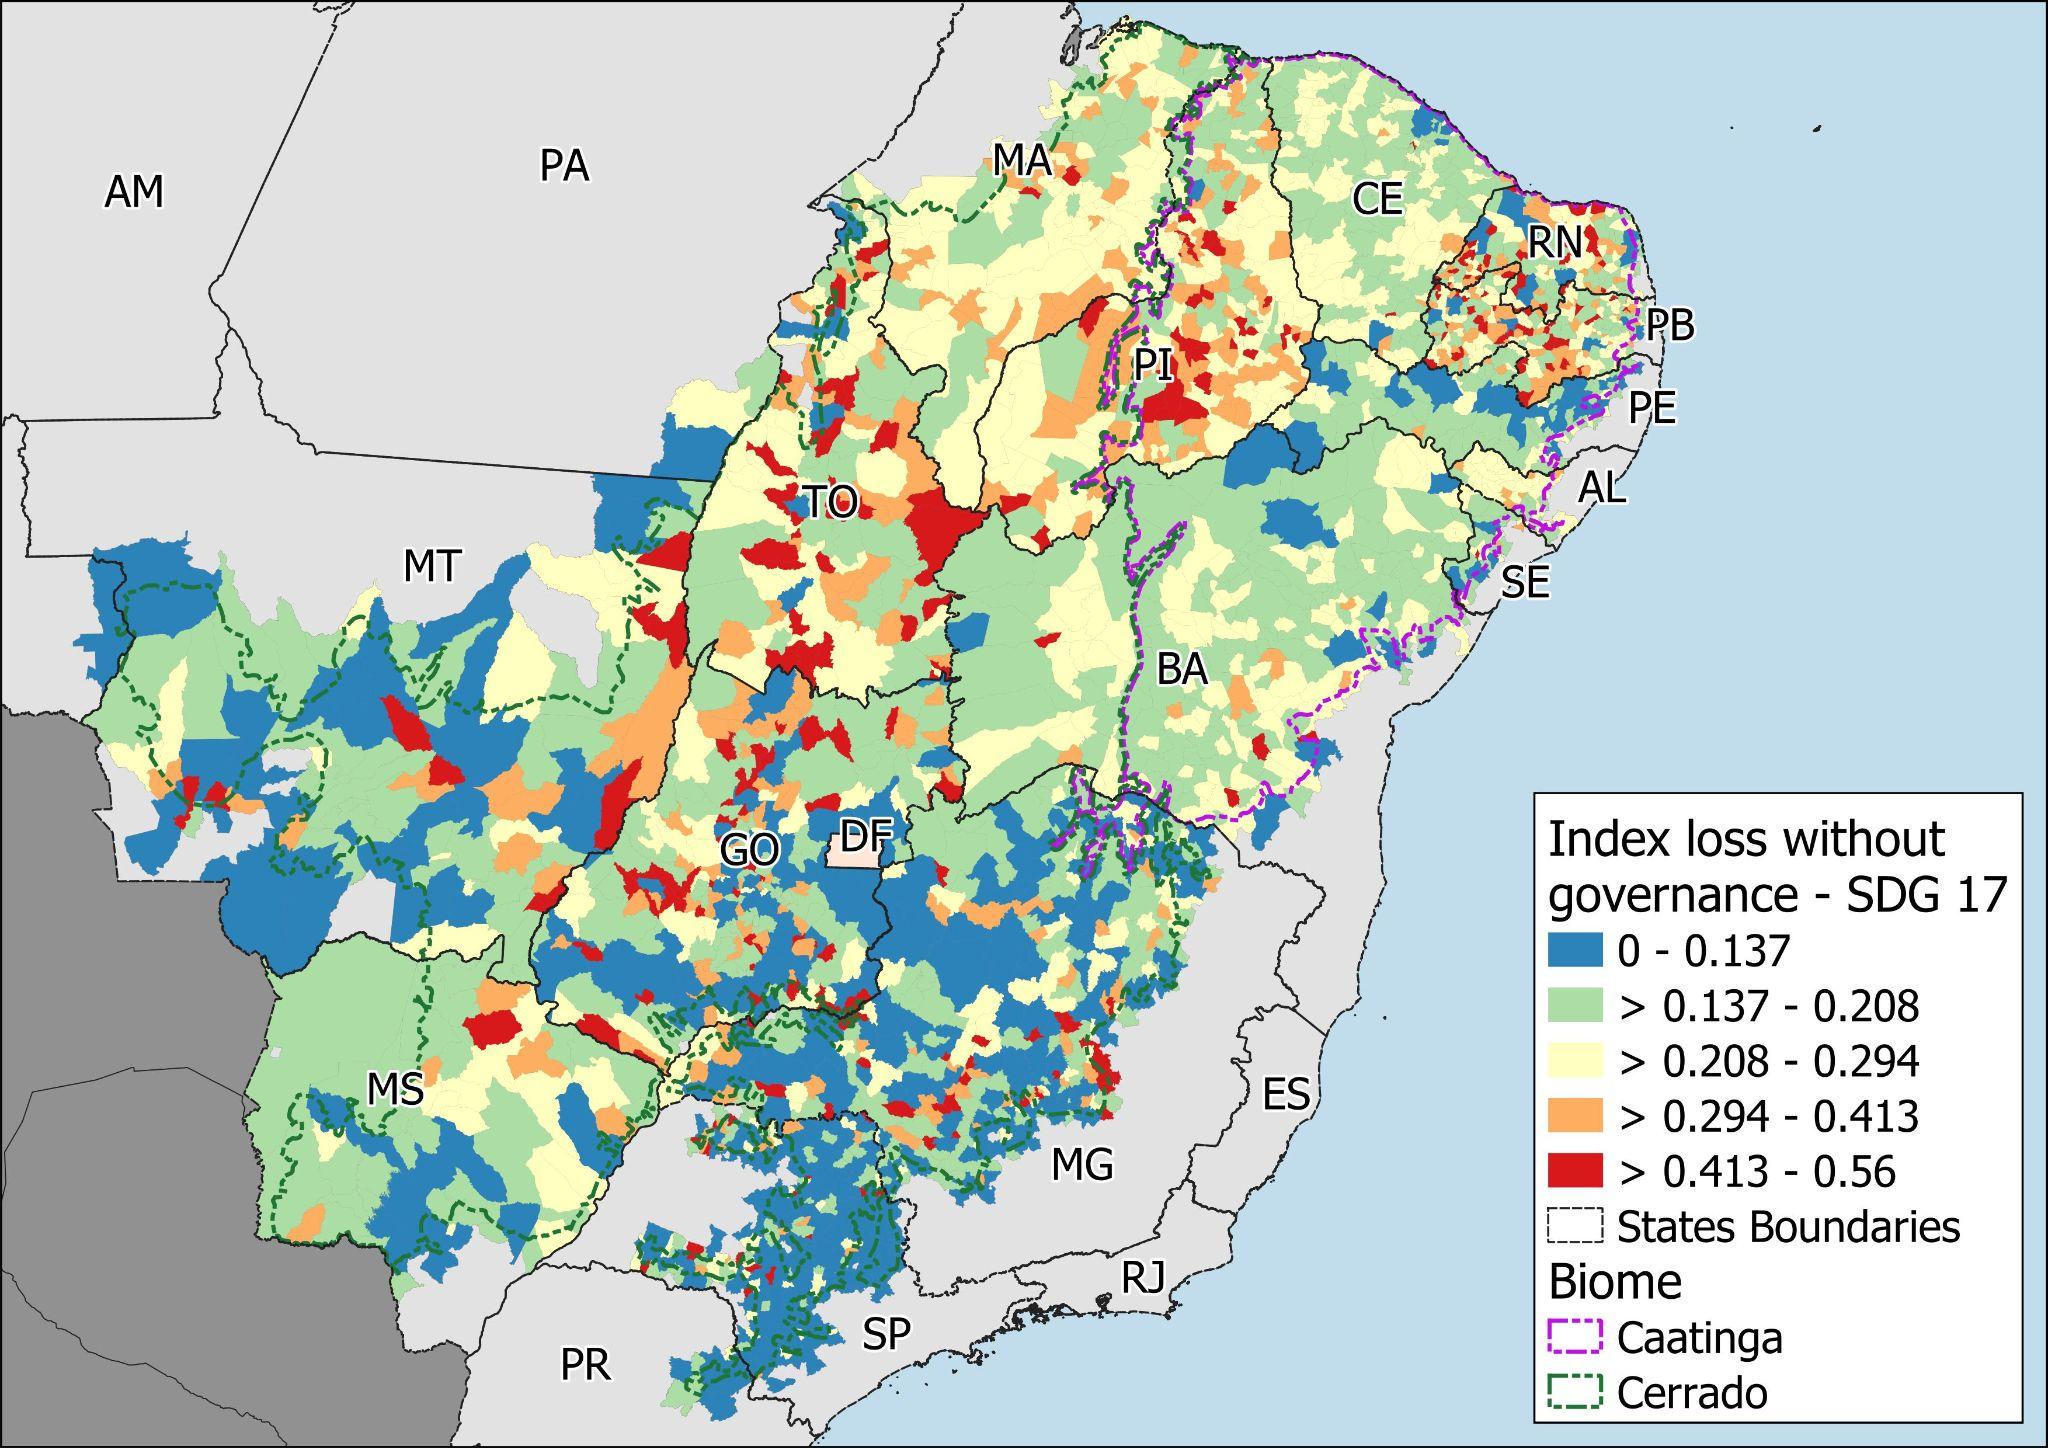


**Nexus performance index**


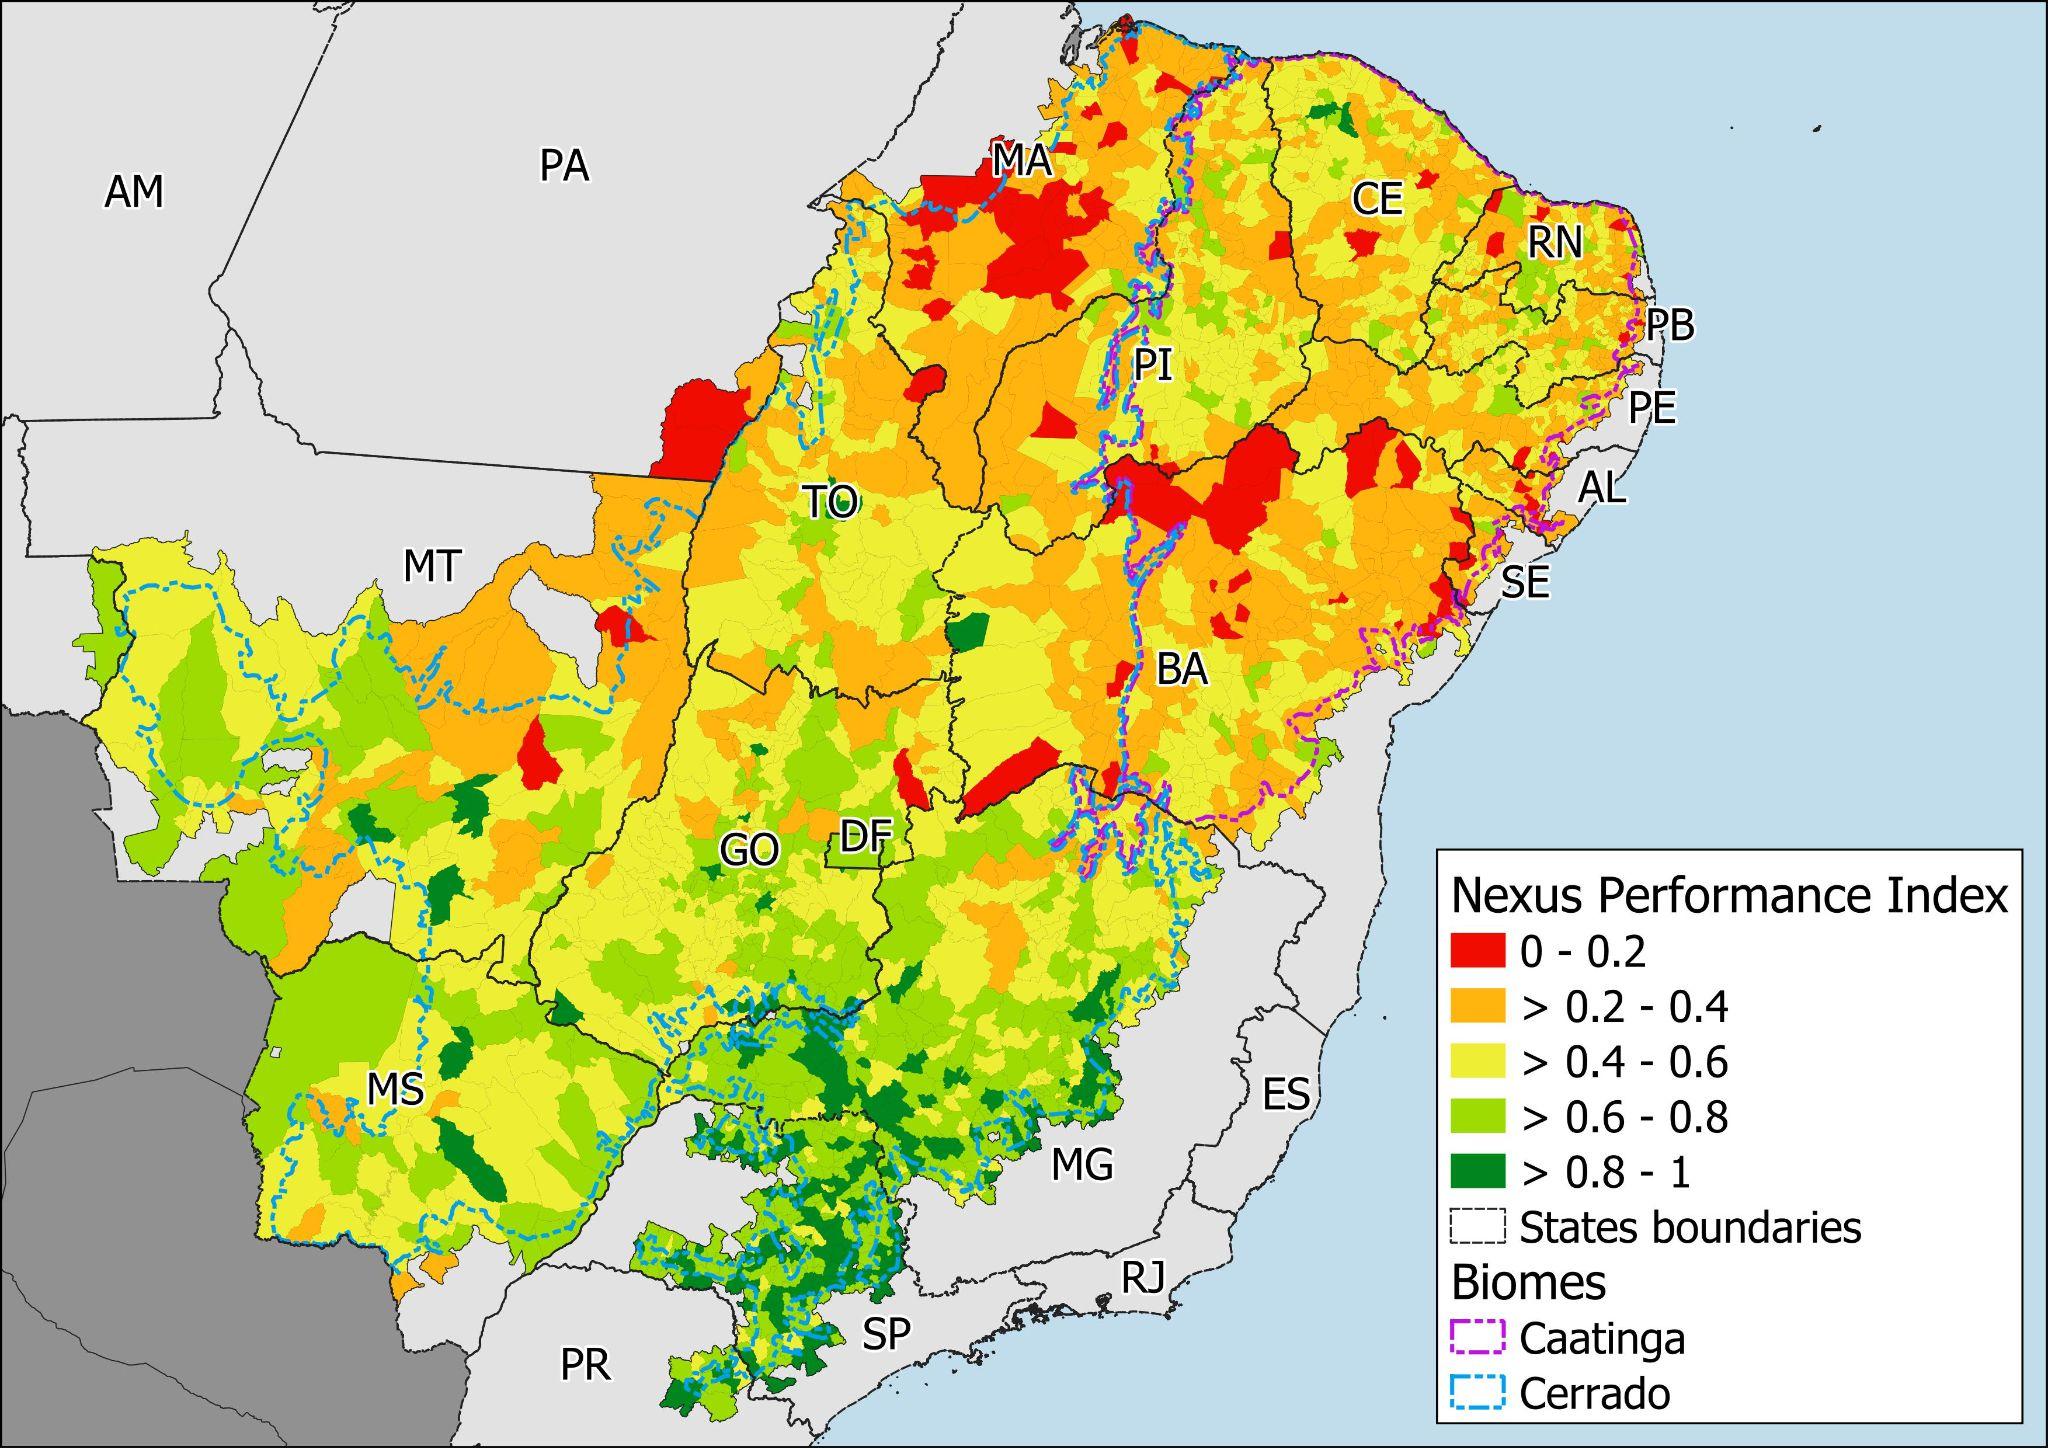


**Nexus synergy index**


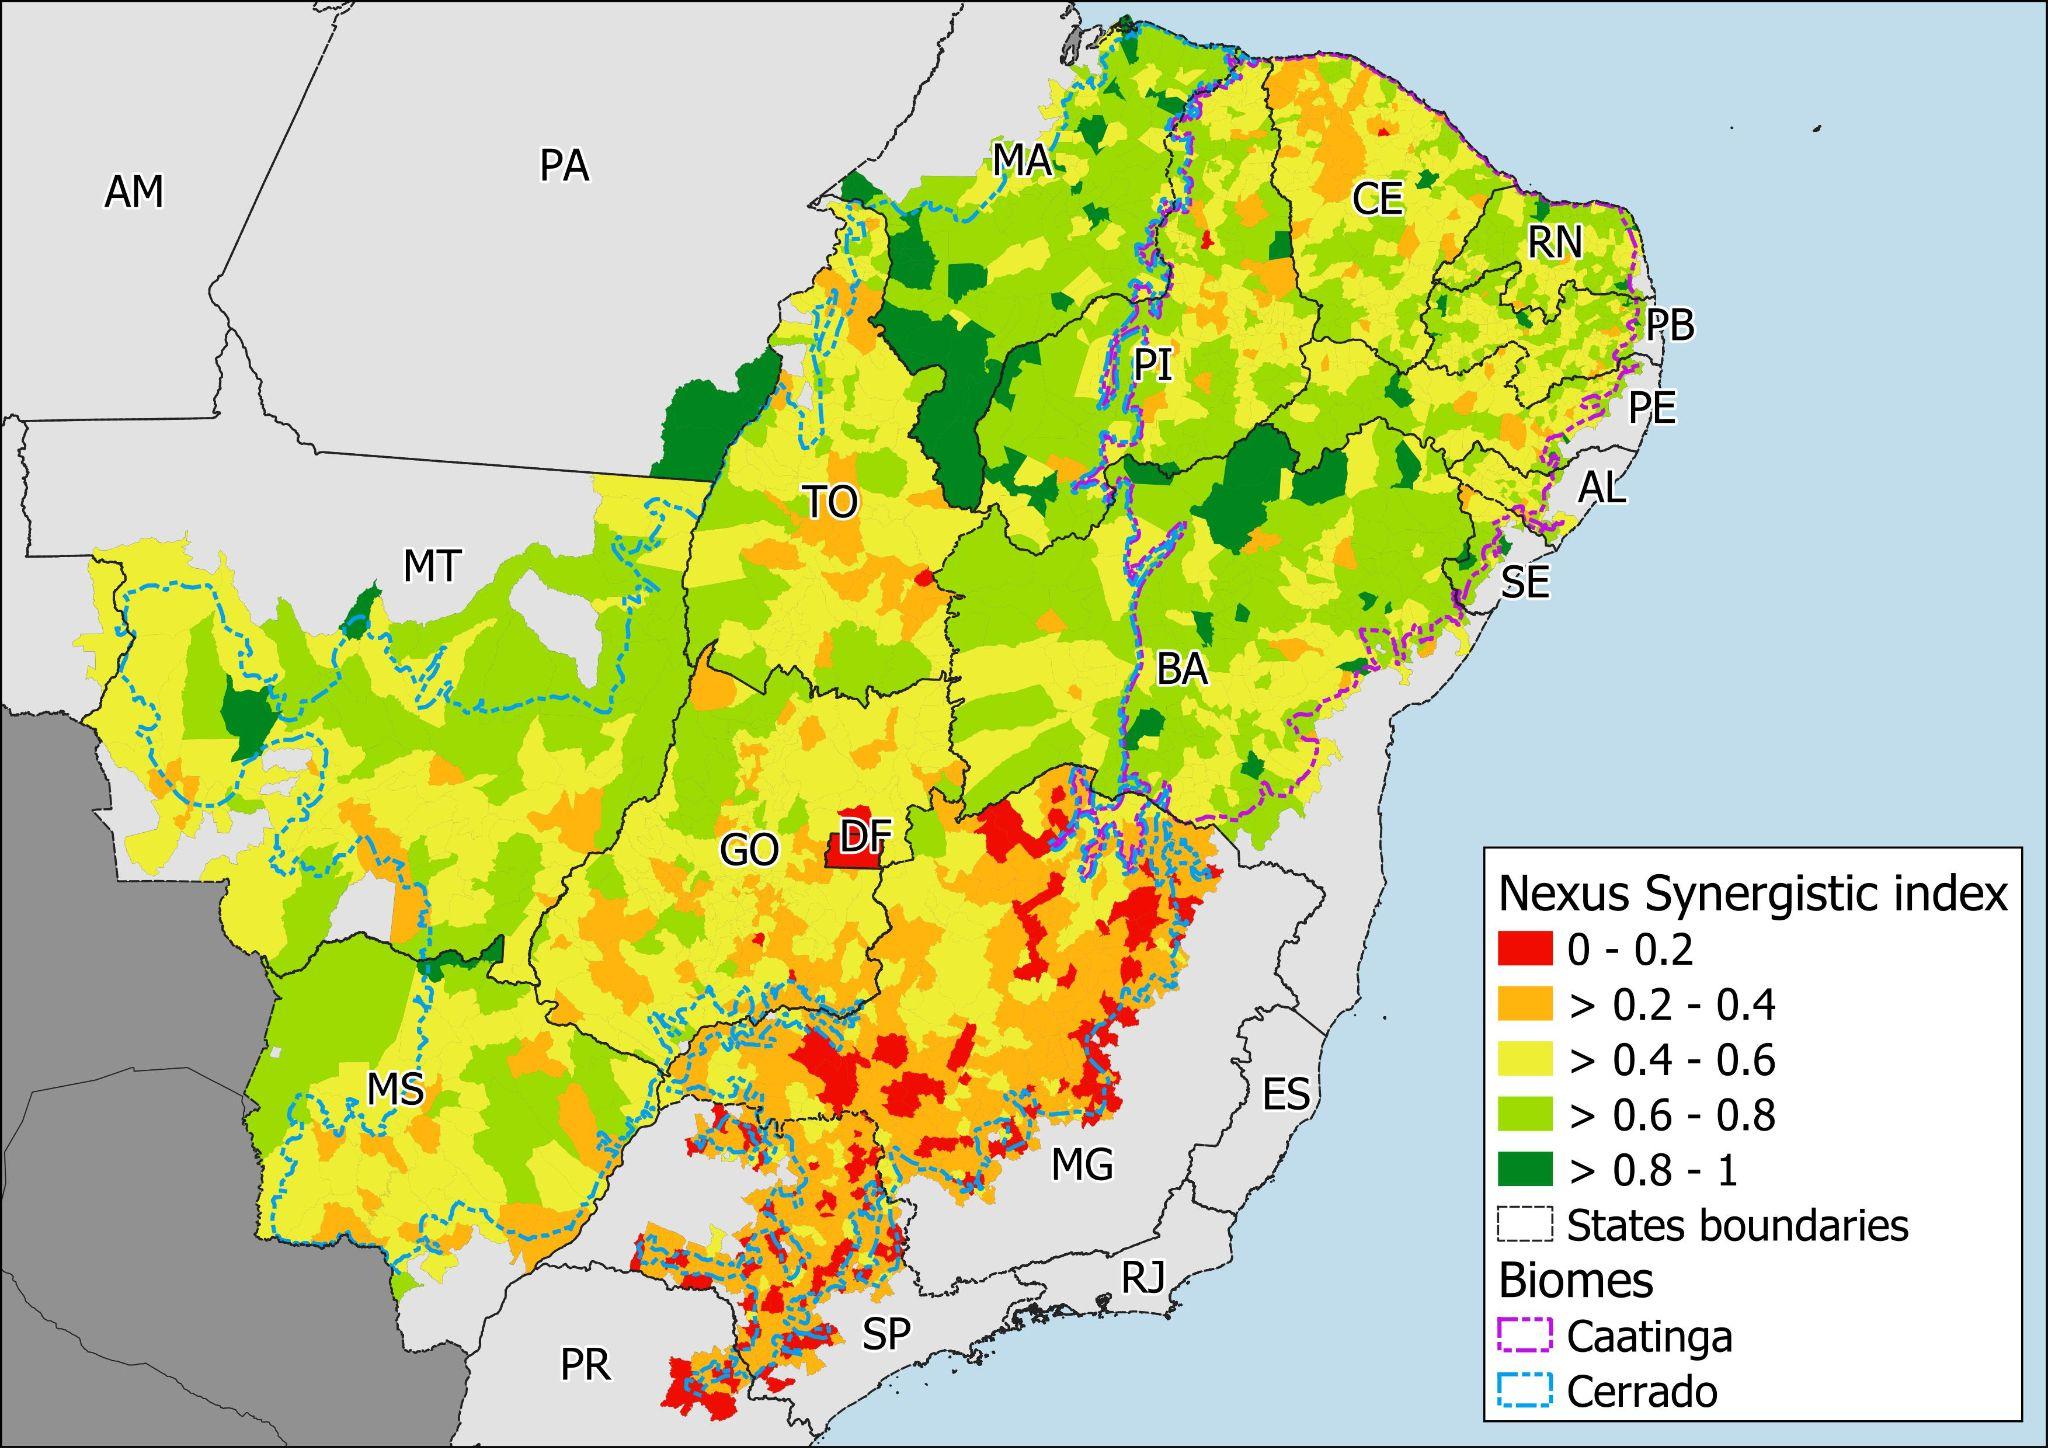


**Overall index**


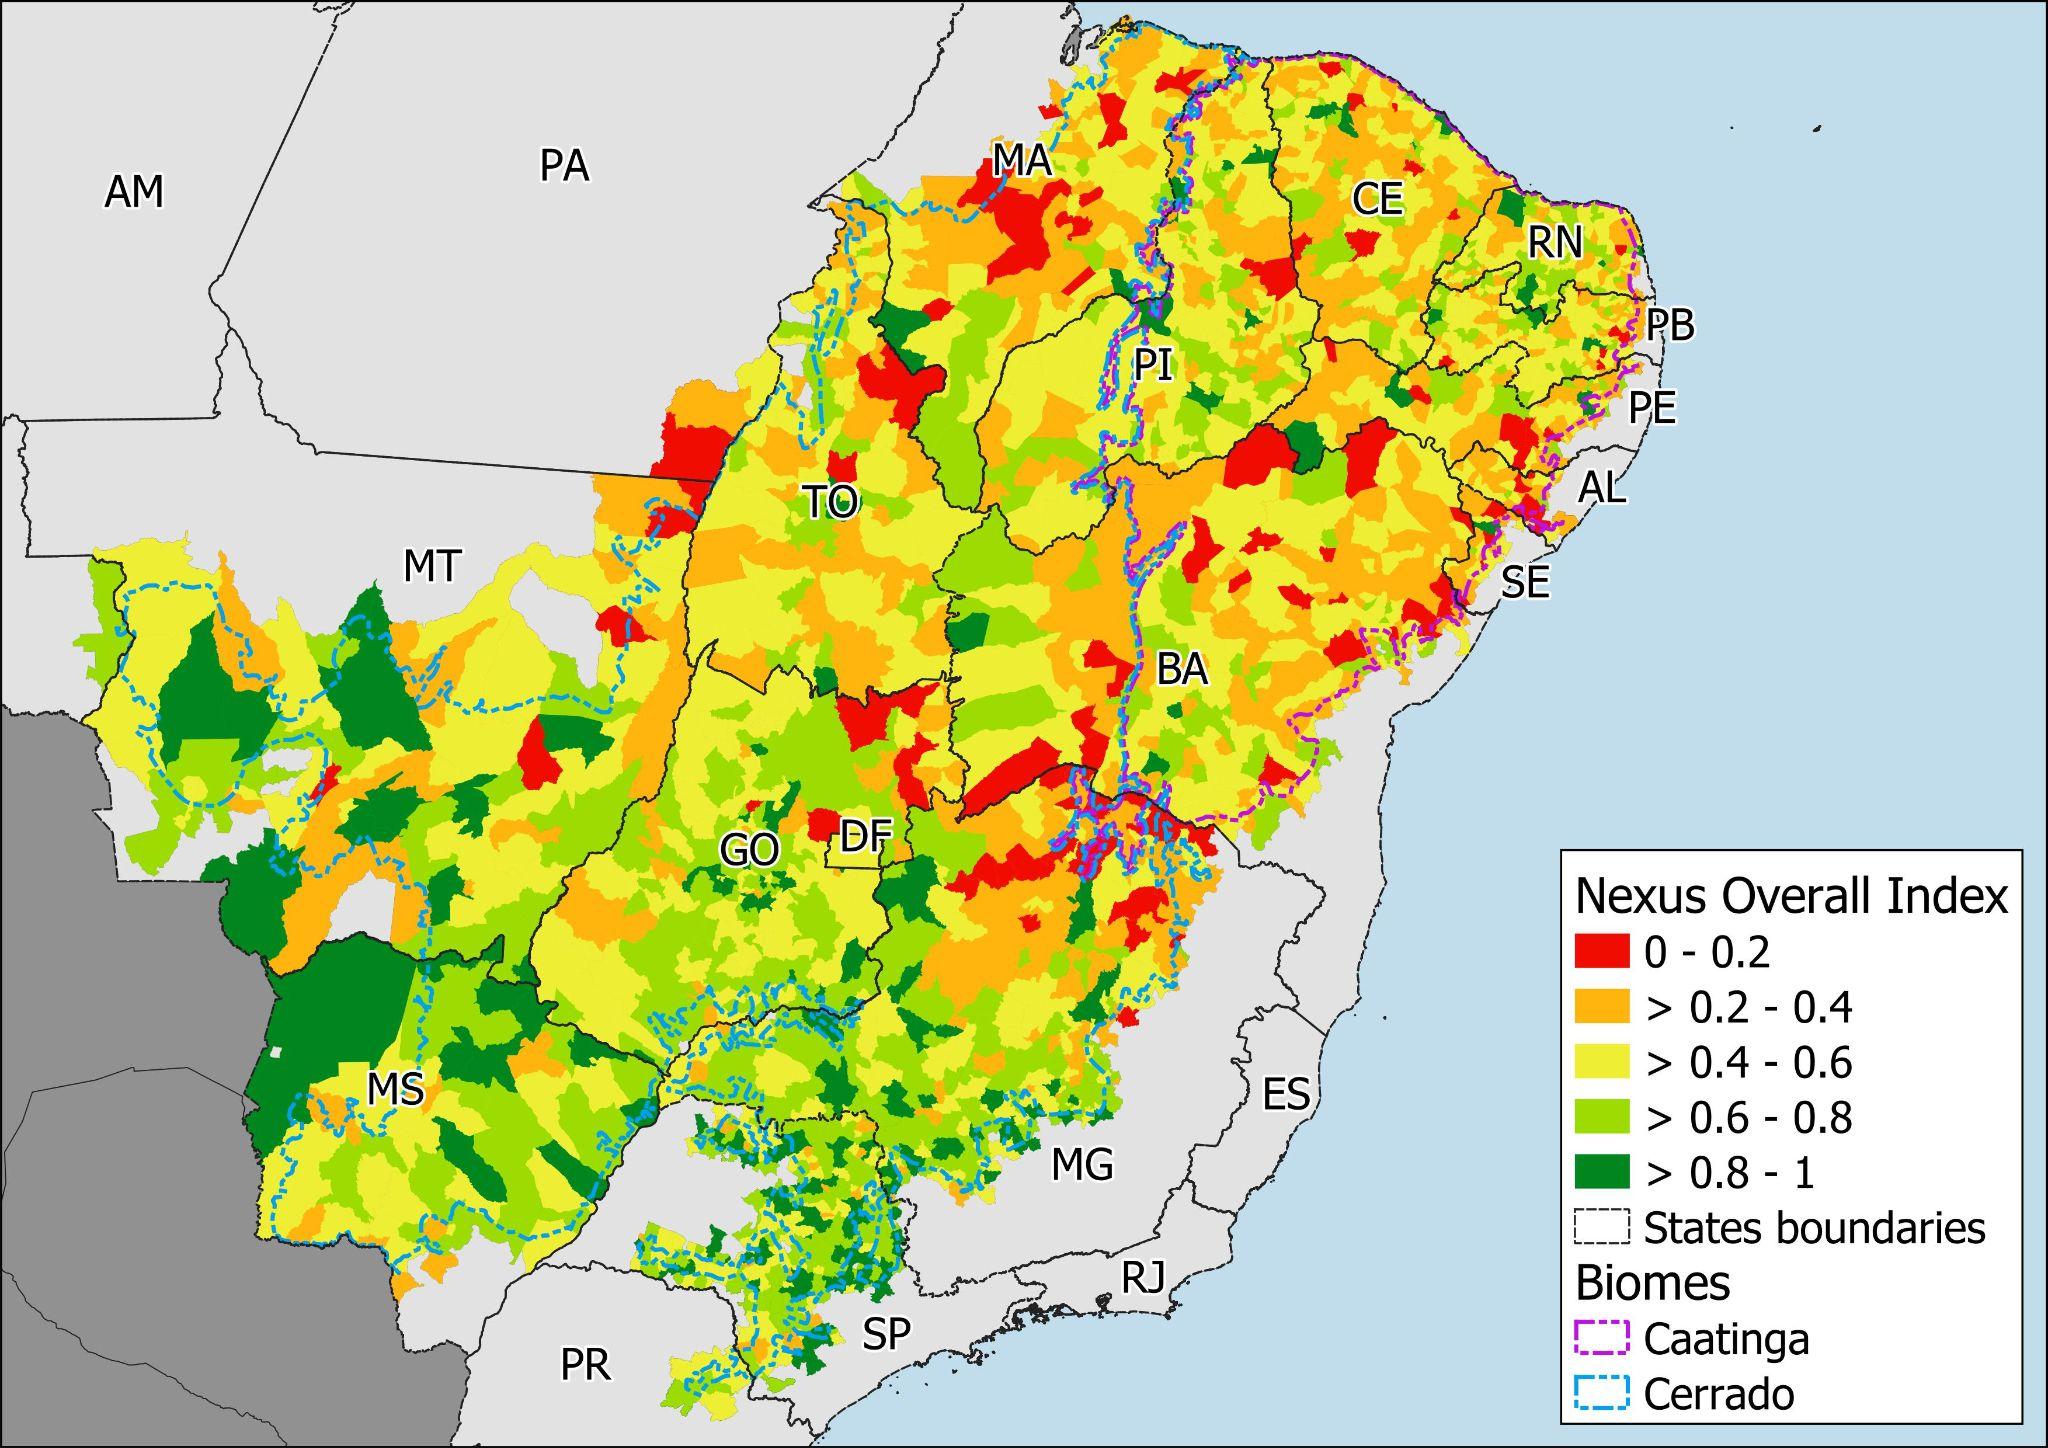


**Sensitivity analysis patterns to governance indicators for**

**Nexus Performance Index - Loss without governance**


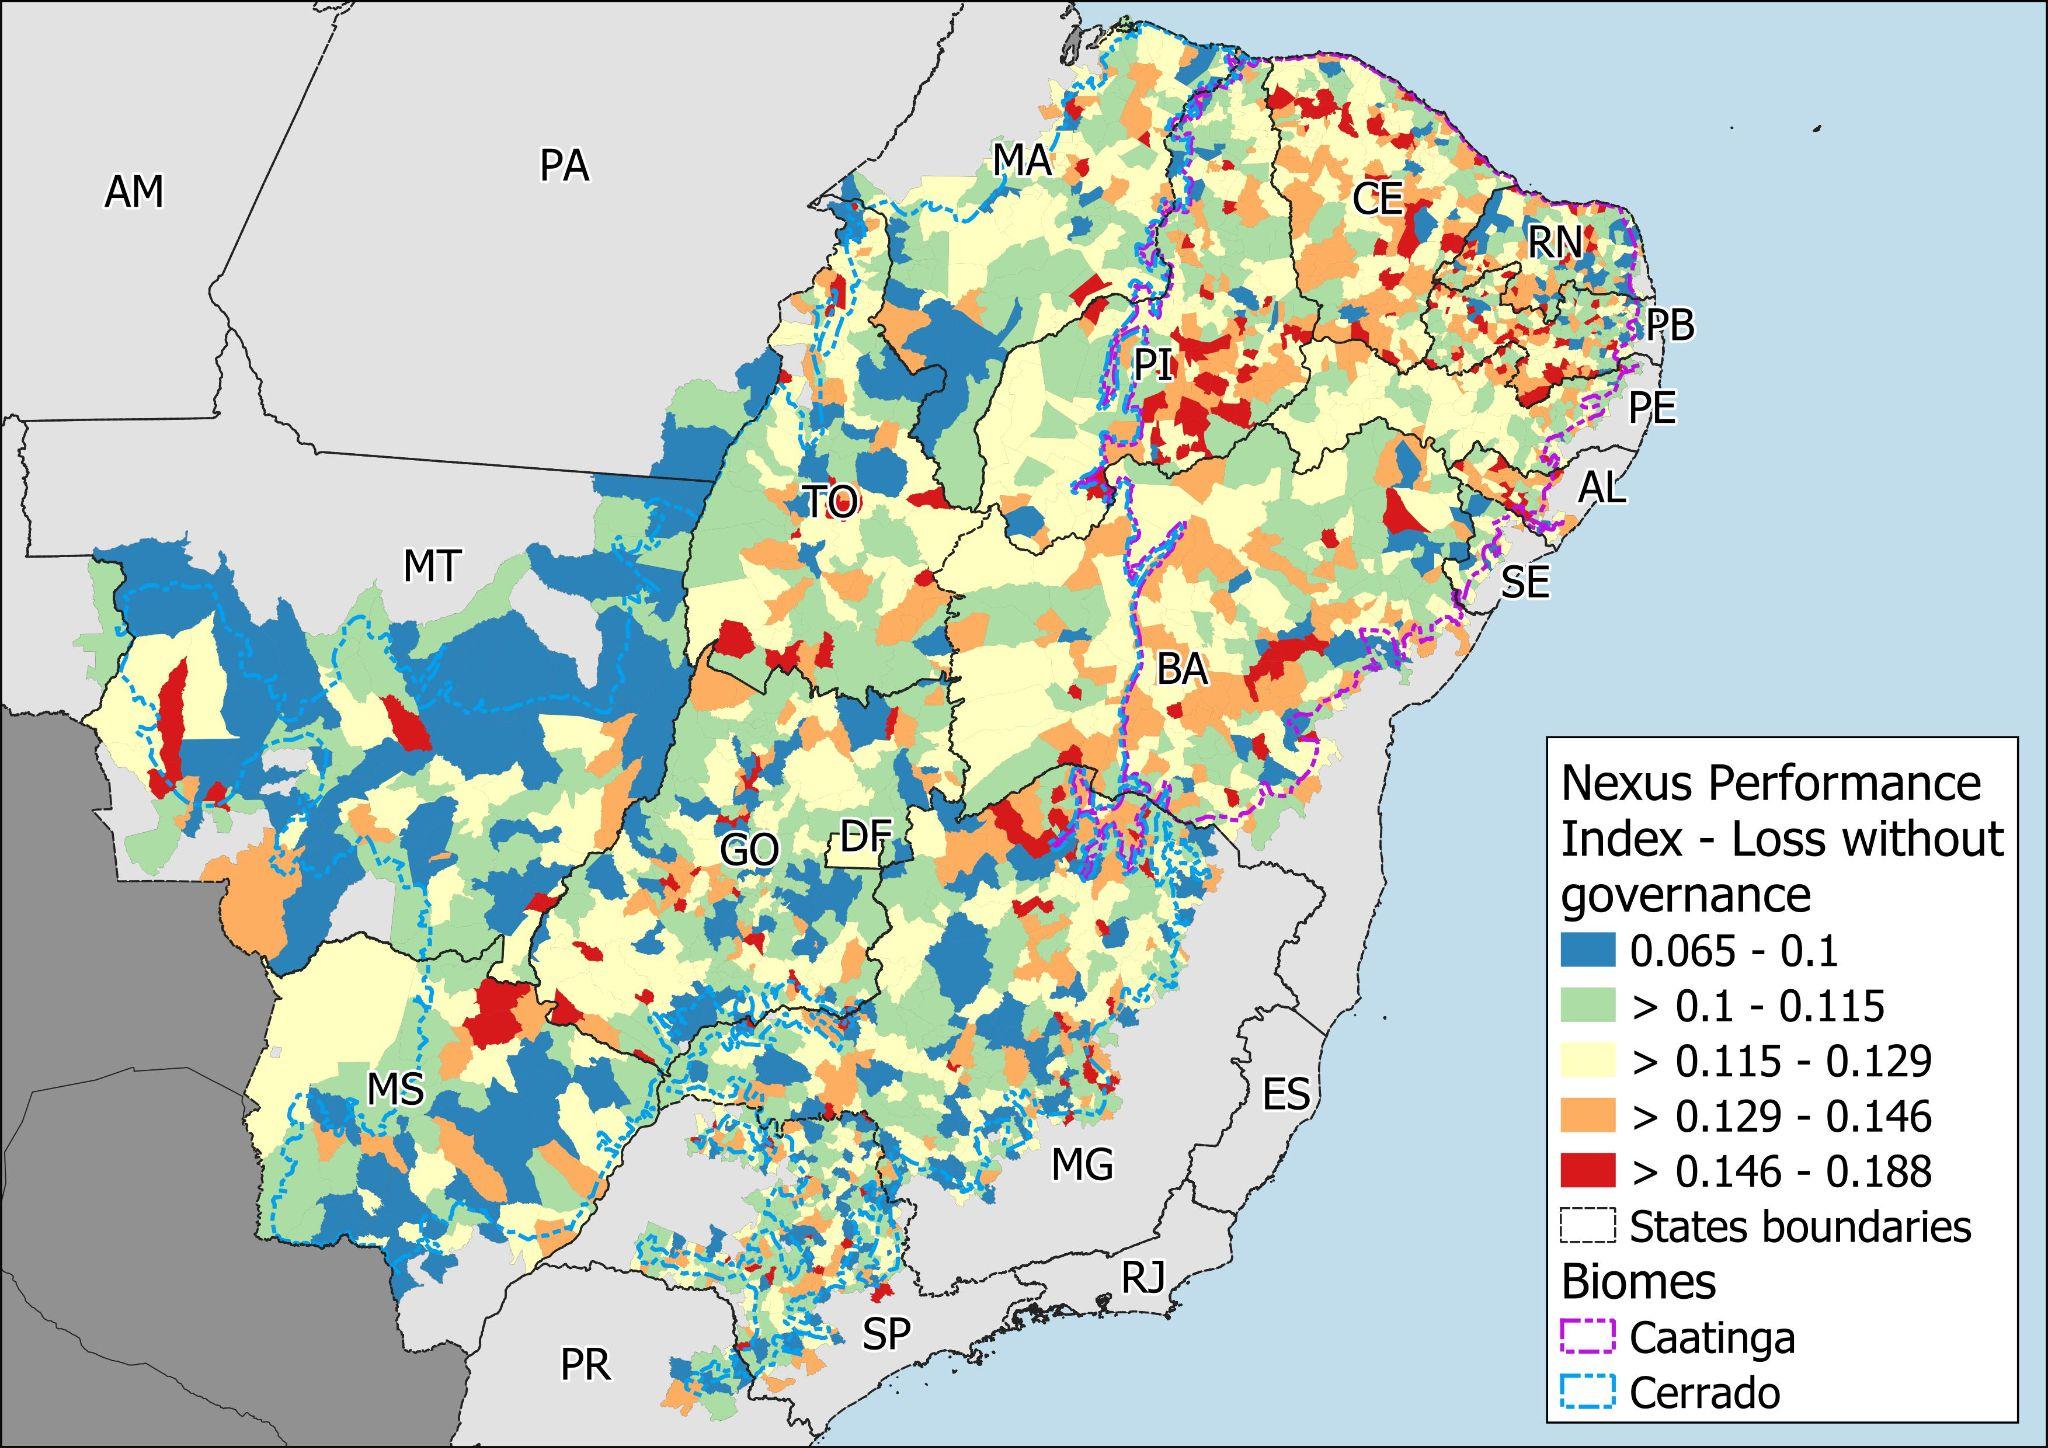

Supplement: Data_Sheet_1.docx [file Data_Sheet_1.docx]
